# Supplementary material
Source: publisher figshare collection journal article supplement (https://acs.figshare.com/ndownloader/files/5727159)
Supplement: Supplementary file 1 [file 5727159]

 
data_Rala 
 
_audit_creation_method            SHELXL-97 
_chemical_name_systematic 
; 
 ? 
; 
_chemical_name_common             ? 
_chemical_melting_point           ? 
_chemical_formula_moiety          ? 
_chemical_formula_sum 
 'C57 H79 Cl Co N6 O15.50' 
_chemical_formula_weight          1190.64 
 
loop_ 
 _atom_type_symbol 
 _atom_type_description 
 _atom_type_scat_dispersion_real 
 _atom_type_scat_dispersion_imag 
 _atom_type_scat_source 
 'C'  'C'   0.0033   0.0016 
 'International Tables Vol C Tables 4.2.6.8 and 6.1.1.4' 
 'H'  'H'   0.0000   0.0000 
 'International Tables Vol C Tables 4.2.6.8 and 6.1.1.4' 
 'N'  'N'   0.0061   0.0033 
 'International Tables Vol C Tables 4.2.6.8 and 6.1.1.4' 
 'O'  'O'   0.0106   0.0060 
 'International Tables Vol C Tables 4.2.6.8 and 6.1.1.4' 
 'Cl'  'Cl'   0.1484   0.1585 
 'International Tables Vol C Tables 4.2.6.8 and 6.1.1.4' 
 'Co'  'Co'   0.3494   0.9721 
 'International Tables Vol C Tables 4.2.6.8 and 6.1.1.4' 
 
_symmetry_cell_setting            ? 
_symmetry_space_group_name_H-M    ? 
 
loop_ 
 _symmetry_equiv_pos_as_xyz 
 'x, y, z' 
 '-x, y+1/2, -z' 
 
_cell_length_a                    11.39840(10) 
_cell_length_b                    21.2100(4) 
_cell_length_c                    12.5746(2) 
_cell_angle_alpha                 90.00 
_cell_angle_beta                  100.3470(10) 
_cell_angle_gamma                 90.00 
_cell_volume                      2990.60(8) 
_cell_formula_units_Z             2 
_cell_measurement_temperature     293(2) 
_cell_measurement_reflns_used     ? 
_cell_measurement_theta_min       ? 
_cell_measurement_theta_max       ? 
 
_exptl_crystal_description        ? 
_exptl_crystal_colour             ? 
_exptl_crystal_size_max           ? 
_exptl_crystal_size_mid           ? 
_exptl_crystal_size_min           ? 
_exptl_crystal_density_meas       ? 
_exptl_crystal_density_diffrn     1.322 
_exptl_crystal_density_method     'not measured' 
_exptl_crystal_F_000              1262 
_exptl_absorpt_coefficient_mu     0.402 
_exptl_absorpt_correction_type    ? 
_exptl_absorpt_correction_T_min   ? 
_exptl_absorpt_correction_T_max   ? 
_exptl_absorpt_process_details    ? 
 
_exptl_special_details 
; 
 ? 
; 
 
_diffrn_ambient_temperature       293(2) 
_diffrn_radiation_wavelength      0.71073 
_diffrn_radiation_type            MoK\a 
_diffrn_radiation_source          'fine-focus sealed tube' 
_diffrn_radiation_monochromator   graphite 
_diffrn_measurement_device_type   ? 
_diffrn_measurement_method        ? 
_diffrn_detector_area_resol_mean  ? 
_diffrn_standards_number          ? 
_diffrn_standards_interval_count  ? 
_diffrn_standards_interval_time   ? 
_diffrn_standards_decay_%         ? 
_diffrn_reflns_number             12213 
_diffrn_reflns_av_R_equivalents   0.0341 
_diffrn_reflns_av_sigmaI/netI     0.0798 
_diffrn_reflns_limit_h_min        -11 
_diffrn_reflns_limit_h_max        12 
_diffrn_reflns_limit_k_min        -20 
_diffrn_reflns_limit_k_max        23 
_diffrn_reflns_limit_l_min        -13 
_diffrn_reflns_limit_l_max        10 
_diffrn_reflns_theta_min          1.65 
_diffrn_reflns_theta_max          23.28 
_reflns_number_total              7913 
_reflns_number_gt                 6200 
_reflns_threshold_expression      >2sigma(I) 
 
_computing_data_collection        ? 
_computing_cell_refinement        ? 
_computing_data_reduction         ? 
_computing_structure_solution     'SHELXS-97 (Sheldrick, 1990)' 
_computing_structure_refinement   'SHELXL-97 (Sheldrick, 1997)' 
_computing_molecular_graphics     ? 
_computing_publication_material   ? 
 
_refine_special_details 
; 
 Refinement of F^2^ against ALL reflections.  The weighted R-factor wR and 
 goodness of fit S are based on F^2^, conventional R-factors R are based 
 on F, with F set to zero for negative F^2^. The threshold expression of 
 F^2^ > 2sigma(F^2^) is used only for calculating R-factors(gt) etc. and is 
 not relevant to the choice of reflections for refinement.  R-factors based 
 on F^2^ are statistically about twice as large as those based on F, and R- 
 factors based on ALL data will be even larger. 
; 
 
_refine_ls_structure_factor_coef  Fsqd  
_refine_ls_matrix_type            full 
_refine_ls_weighting_scheme       calc  
_refine_ls_weighting_details 
 'calc w=1/[\s^2^(Fo^2^)+(0.1949P)^2^+3.9484P] where P=(Fo^2^+2Fc^2^)/3' 
_atom_sites_solution_primary      direct 
_atom_sites_solution_secondary    difmap 
_atom_sites_solution_hydrogens    geom 
_refine_ls_hydrogen_treatment     mixed 
_refine_ls_extinction_method      none 
_refine_ls_extinction_coef        ? 
_refine_ls_abs_structure_details 
 'Flack H D (1983), Acta Cryst. A39, 876-881' 
_refine_ls_abs_structure_Flack    0.01(3) 
_refine_ls_number_reflns          7913 
_refine_ls_number_parameters      667 
_refine_ls_number_restraints      1 
_refine_ls_R_factor_all           0.1217 
_refine_ls_R_factor_gt            0.0975 
_refine_ls_wR_factor_ref          0.2826 
_refine_ls_wR_factor_gt           0.2566 
_refine_ls_goodness_of_fit_ref    1.047 
_refine_ls_restrained_S_all       1.047 
_refine_ls_shift/su_max           0.240 
_refine_ls_shift/su_mean          0.016 
 
loop_ 
 _atom_site_label 
 _atom_site_type_symbol 
 _atom_site_fract_x 
 _atom_site_fract_y 
 _atom_site_fract_z 
 _atom_site_U_iso_or_equiv 
 _atom_site_adp_type 
 _atom_site_occupancy 
 _atom_site_symmetry_multiplicity 
 _atom_site_calc_flag 
 _atom_site_refinement_flags 
 _atom_site_disorder_assembly 
 _atom_site_disorder_group 
Co Co 0.71461(9) 0.9618(2) 0.30811(9) 0.0299(3) Uani 1 1 d . . . 
O21 O 0.9969(10) 1.1002(7) 0.5504(8) 0.108(4) Uani 1 1 d . . . 
O22 O 1.0519(7) 1.1268(4) 0.7184(7) 0.062(2) Uani 1 1 d . . . 
O31 O 0.3516(7) 0.9744(5) 0.0266(8) 0.077(3) Uani 1 1 d . . . 
O32 O 0.3174(10) 0.9738(6) -0.1521(9) 0.100(4) Uani 1 1 d . . . 
O41 O 1.0073(11) 0.9439(6) 0.0672(8) 0.102(4) Uani 1 1 d . . . 
O42 O 0.9769(8) 0.9389(6) -0.1141(7) 0.085(3) Uani 1 1 d . . . 
O51 O 0.5235(8) 0.8329(5) 0.5923(8) 0.070(2) Uani 1 1 d . . . 
O52 O 0.5697(10) 0.8152(6) 0.7697(8) 0.092(3) Uani 1 1 d . . . 
O61 O 0.4213(7) 1.0329(5) 0.3764(8) 0.066(2) Uani 1 1 d . . . 
O62 O 0.4620(8) 0.9840(5) 0.5345(7) 0.069(2) Uani 1 1 d . . . 
N1 N 0.7395(6) 0.9643(5) 0.4660(5) 0.0368(17) Uani 1 1 d . A . 
N2 N 0.6602(6) 1.0492(4) 0.3016(6) 0.0328(18) Uani 1 1 d . A . 
N3 N 0.6888(6) 0.9597(5) 0.1518(5) 0.0349(16) Uani 1 1 d . A . 
N4 N 0.7713(6) 0.8749(4) 0.3161(6) 0.0307(17) Uani 1 1 d . A . 
N5 N 0.5456(7) 0.9330(4) 0.2914(7) 0.041(2) Uani 1 1 d . . . 
H5A H 0.5028 0.9591 0.2429 0.049 Uiso 1 1 calc R . . 
H5B H 0.5428 0.8949 0.2599 0.049 Uiso 1 1 calc R . . 
C1 C 0.7561(11) 0.9125(6) 0.5342(8) 0.044(3) Uani 1 1 d . . . 
C2 C 0.7711(13) 0.9346(7) 0.6465(10) 0.063(4) Uani 1 1 d . . . 
H2 H 0.7789 0.9100 0.7087 0.075 Uiso 1 1 calc R . . 
C3 C 0.7711(12) 0.9990(6) 0.6404(10) 0.056(3) Uani 1 1 d . . . 
H3 H 0.7839 1.0263 0.6992 0.067 Uiso 1 1 calc R A . 
C4 C 0.7485(11) 1.0177(6) 0.5295(10) 0.053(3) Uani 1 1 d . A . 
C5 C 0.7274(9) 1.0801(5) 0.4905(8) 0.037(2) Uani 1 1 d . . . 
C6 C 0.6739(8) 1.0913(5) 0.3856(8) 0.036(2) Uani 1 1 d . A . 
C7 C 0.6139(8) 1.1491(6) 0.3475(8) 0.040(2) Uani 1 1 d . . . 
H7 H 0.6135 1.1860 0.3872 0.048 Uiso 1 1 calc R A . 
C8 C 0.5578(8) 1.1401(5) 0.2429(9) 0.041(3) Uani 1 1 d . . . 
H8 H 0.5084 1.1682 0.1991 0.050 Uiso 1 1 calc R . . 
C9 C 0.5920(8) 1.0770(5) 0.2149(7) 0.033(2) Uani 1 1 d . . . 
C10 C 0.5662(8) 1.0543(5) 0.1084(7) 0.033(2) Uani 1 1 d . . . 
C11 C 0.6213(8) 1.0005(5) 0.0826(8) 0.038(2) Uani 1 1 d . . . 
C12 C 0.6259(10) 0.9817(6) -0.0287(8) 0.053(3) Uani 1 1 d . . . 
H12 H 0.5854 1.0011 -0.0909 0.063 Uiso 1 1 calc R . . 
C13 C 0.6969(10) 0.9327(6) -0.0257(8) 0.043(3) Uani 1 1 d . . . 
H13 H 0.7191 0.9127 -0.0849 0.052 Uiso 1 1 calc R A . 
C14 C 0.7344(9) 0.9154(5) 0.0874(8) 0.038(2) Uani 1 1 d . A . 
C15 C 0.8028(8) 0.8631(5) 0.1267(8) 0.036(2) Uani 1 1 d . . . 
C16 C 0.8098(7) 0.8430(5) 0.2317(8) 0.036(2) Uani 1 1 d . A . 
C17 C 0.8493(8) 0.7793(5) 0.2708(9) 0.042(2) Uani 1 1 d . . . 
H17 H 0.8825 0.7485 0.2327 0.050 Uiso 1 1 calc R A . 
C18 C 0.8281(8) 0.7746(5) 0.3715(7) 0.033(2) Uani 1 1 d . . . 
H18 H 0.8407 0.7391 0.4153 0.039 Uiso 1 1 calc R . . 
C19 C 0.7817(8) 0.8351(5) 0.4007(7) 0.033(2) Uani 1 1 d . . . 
C20 C 0.7676(9) 0.8508(5) 0.5041(8) 0.038(2) Uani 1 1 d . . . 
C21 C 0.7412(9) 1.1336(5) 0.5705(9) 0.041(2) Uani 1 1 d . A . 
H21 H 0.6730 1.1373 0.6078 0.050 Uiso 1 1 calc R . . 
C22 C 0.7969(9) 1.1949(5) 0.5564(9) 0.043(3) Uani 1 1 d . . . 
C23 C 0.7402(11) 1.2523(7) 0.5991(11) 0.062(3) Uani 1 1 d . . . 
H23A H 0.7834 1.2895 0.5858 0.094 Uiso 1 1 calc R . . 
H23B H 0.7426 1.2476 0.6754 0.094 Uiso 1 1 calc R . . 
H23C H 0.6588 1.2559 0.5629 0.094 Uiso 1 1 calc R . . 
C24 C 0.8578(11) 1.2096(6) 0.4606(10) 0.063(3) Uani 1 1 d . . . 
H24A H 0.8881 1.2519 0.4669 0.095 Uiso 1 1 calc R . . 
H24B H 0.8012 1.2054 0.3945 0.095 Uiso 1 1 calc R . . 
H24C H 0.9225 1.1806 0.4601 0.095 Uiso 1 1 calc R . . 
C25 C 0.8606(9) 1.1494(5) 0.6445(8) 0.043(2) Uani 1 1 d . A . 
H25 H 0.8551 1.1607 0.7190 0.051 Uiso 1 1 calc R . . 
C26 C 0.9705(11) 1.1221(6) 0.6302(9) 0.052(3) Uani 1 1 d . . . 
C27 C 1.1699(13) 1.1007(9) 0.7086(15) 0.098(6) Uani 1 1 d . . . 
H27A H 1.2240 1.1059 0.7760 0.147 Uiso 1 1 calc R A . 
H27B H 1.2003 1.1227 0.6526 0.147 Uiso 1 1 calc R . . 
H27C H 1.1619 1.0567 0.6910 0.147 Uiso 1 1 calc R . . 
C31 C 0.4900(9) 1.0927(5) 0.0243(8) 0.040(2) Uani 1 1 d . . . 
H31 H 0.5356 1.1246 -0.0072 0.049 Uiso 1 1 calc R A . 
C32 C 0.3637(10) 1.1132(6) 0.0255(9) 0.051(3) Uani 1 1 d . A . 
C33 C 0.3290(15) 1.1791(7) -0.0235(11) 0.074(4) Uani 1 1 d . . . 
H33A H 0.3724 1.1872 -0.0809 0.112 Uiso 1 1 calc R A . 
H33B H 0.3483 1.2106 0.0315 0.112 Uiso 1 1 calc R . . 
H33C H 0.2450 1.1801 -0.0516 0.112 Uiso 1 1 calc R . . 
C34 C 0.3000(10) 1.0973(7) 0.1152(10) 0.058(3) Uani 1 1 d . . . 
H34A H 0.2927 1.1344 0.1572 0.088 Uiso 1 1 calc R A . 
H34B H 0.3441 1.0658 0.1605 0.088 Uiso 1 1 calc R . . 
H34C H 0.2220 1.0814 0.0860 0.088 Uiso 1 1 calc R . . 
C35 C 0.3909(10) 1.0665(6) -0.0555(9) 0.051(3) Uani 1 1 d . A . 
H35 H 0.3879 1.0869 -0.1259 0.062 Uiso 1 1 calc R . . 
C36 C 0.3508(13) 1.0034(10) -0.0697(11) 0.081(5) Uani 1 1 d . . . 
C37 C 0.3092(18) 0.9056(8) 0.010(2) 0.142(10) Uani 1 1 d . . . 
H37A H 0.3110 0.8860 0.0793 0.213 Uiso 1 1 calc R A . 
H37B H 0.3609 0.8830 -0.0290 0.213 Uiso 1 1 calc R . . 
H37C H 0.2292 0.9048 -0.0301 0.213 Uiso 1 1 calc R . . 
C41 C 0.8513(9) 0.8219(5) 0.0490(9) 0.042(2) Uani 1 1 d . A . 
H41 H 0.7932 0.7917 0.0114 0.050 Uiso 1 1 calc R . . 
C42 C 0.9791(10) 0.7994(7) 0.0630(10) 0.059(3) Uani 1 1 d . . . 
C43 C 0.9936(13) 0.7348(7) 0.0169(16) 0.093(5) Uani 1 1 d . . . 
H43A H 0.9305 0.7274 -0.0434 0.140 Uiso 1 1 calc R . . 
H43B H 0.9904 0.7035 0.0715 0.140 Uiso 1 1 calc R . . 
H43C H 1.0691 0.7323 -0.0065 0.140 Uiso 1 1 calc R . . 
C44 C 1.0725(10) 0.8178(7) 0.1593(9) 0.061(3) Uani 1 1 d . . . 
H44A H 1.0558 0.8594 0.1828 0.091 Uiso 1 1 calc R . . 
H44B H 1.1499 0.8174 0.1392 0.091 Uiso 1 1 calc R . . 
H44C H 1.0712 0.7884 0.2171 0.091 Uiso 1 1 calc R . . 
C45 C 0.9383(9) 0.8490(7) -0.0233(9) 0.054(3) Uani 1 1 d . A . 
H45 H 0.9243 0.8326 -0.0973 0.064 Uiso 1 1 calc R . . 
C46 C 0.9781(10) 0.9142(8) -0.0141(10) 0.059(3) Uani 1 1 d . . . 
C47 C 1.0074(15) 1.0065(10) -0.1125(16) 0.118(8) Uani 1 1 d . . . 
H47A H 1.0046 1.0211 -0.1852 0.176 Uiso 1 1 calc R A . 
H47B H 1.0862 1.0126 -0.0717 0.176 Uiso 1 1 calc R . . 
H47C H 0.9511 1.0299 -0.0797 0.176 Uiso 1 1 calc R . . 
C51 C 0.7926(11) 0.8008(6) 0.5898(9) 0.050(3) Uani 1 1 d . . . 
H51 H 0.8778 0.7964 0.6194 0.061 Uiso 1 1 calc R A . 
C52 C 0.7258(12) 0.7385(6) 0.5846(11) 0.060(3) Uani 1 1 d . A . 
C53 C 0.6257(11) 0.7232(6) 0.4975(10) 0.058(3) Uani 1 1 d . . . 
H53A H 0.6514 0.6932 0.4494 0.087 Uiso 1 1 calc R A . 
H53B H 0.5988 0.7609 0.4583 0.087 Uiso 1 1 calc R . . 
H53C H 0.5616 0.7056 0.5280 0.087 Uiso 1 1 calc R . . 
C54 C 0.8034(14) 0.6806(6) 0.6280(13) 0.076(4) Uani 1 1 d . . . 
H54A H 0.8668 0.6939 0.6845 0.115 Uiso 1 1 calc R A . 
H54B H 0.8366 0.6621 0.5702 0.115 Uiso 1 1 calc R . . 
H54C H 0.7549 0.6500 0.6560 0.115 Uiso 1 1 calc R . . 
C55 C 0.7122(10) 0.7847(6) 0.6731(8) 0.048(3) Uani 1 1 d . A . 
H55 H 0.7553 0.7733 0.7451 0.058 Uiso 1 1 calc R . . 
C56 C 0.5929(13) 0.8158(6) 0.6714(10) 0.063(3) Uani 1 1 d . . . 
C57 C 0.454(2) 0.8412(15) 0.7777(16) 0.170(12) Uani 1 1 d . . . 
H57A H 0.4429 0.8397 0.8516 0.255 Uiso 1 1 calc R A . 
H57B H 0.3927 0.8170 0.7335 0.255 Uiso 1 1 calc R . . 
H57C H 0.4497 0.8842 0.7533 0.255 Uiso 1 1 calc R . . 
C61 C 0.4788(10) 0.9272(6) 0.3812(9) 0.047(3) Uani 1 1 d . . . 
H61 H 0.5254 0.9010 0.4378 0.057 Uiso 1 1 calc R A . 
C62 C 0.3596(9) 0.8937(6) 0.3397(11) 0.053(3) Uani 1 1 d . . . 
H62A H 0.3746 0.8540 0.3079 0.080 Uiso 1 1 calc R . . 
H62B H 0.3112 0.9195 0.2864 0.080 Uiso 1 1 calc R . . 
H62C H 0.3185 0.8865 0.3990 0.080 Uiso 1 1 calc R . . 
C63 C 0.4541(10) 0.9866(6) 0.4285(9) 0.048(3) Uani 1 1 d . . . 
C64 C 0.4237(16) 1.0383(7) 0.5873(12) 0.086(5) Uani 1 1 d . . . 
H64A H 0.4339 1.0306 0.6637 0.128 Uiso 1 1 calc R . . 
H64B H 0.3411 1.0465 0.5592 0.128 Uiso 1 1 calc R . . 
H64C H 0.4706 1.0742 0.5744 0.128 Uiso 1 1 calc R . . 
O72 O 1.0343 0.8923 0.3962 0.041 Uani 0.50 1 d P A 1 
O71 O 1.0679 0.9558 0.5417 0.056 Uani 0.50 1 d P A 1 
N6 N 0.8815 0.9934 0.3375 0.038 Uani 0.50 1 d P A 1 
H6A H 0.8970 0.9838 0.2716 0.045 Uiso 0.50 1 calc PR A 1 
H6B H 0.8616 1.0344 0.3316 0.045 Uiso 0.50 1 calc PR A 1 
C71 C 0.9802 1.0020 0.3768 0.025 Uani 0.50 1 d P A 1 
H71A H 0.9706 1.0296 0.4372 0.029 Uiso 0.50 1 calc PR A 1 
C72 C 1.0846 1.0313 0.3412 0.035 Uani 0.50 1 d P A 1 
H72A H 1.0604 1.0695 0.3026 0.053 Uiso 0.50 1 calc PR A 1 
H72B H 1.1167 1.0026 0.2947 0.053 Uiso 0.50 1 calc PR A 1 
H72C H 1.1444 1.0407 0.4032 0.053 Uiso 0.50 1 calc PR A 1 
C73 C 1.0258 0.9432 0.4356 0.031 Uani 0.50 1 d P A 1 
C74 C 1.0966 0.9066 0.6168 0.050 Uani 0.50 1 d P A 1 
H74A H 1.1247 0.9240 0.6873 0.075 Uiso 0.50 1 calc PR A 1 
H74B H 1.1578 0.8808 0.5959 0.075 Uiso 0.50 1 calc PR A 1 
H74C H 1.0269 0.8814 0.6185 0.075 Uiso 0.50 1 calc PR A 1 
O81 O 0.8772 1.1100 0.2337 0.120 Uani 0.50 1 d P A 2 
O82 O 0.8934 1.0686 0.0944 0.060 Uani 0.50 1 d P A 2 
N7 N 0.8748 0.9858 0.2808 0.038 Uani 0.50 1 d P A 2 
H7A H 0.9098 0.9806 0.3503 0.045 Uiso 0.50 1 calc PR A 2 
H7B H 0.8869 0.9484 0.2507 0.045 Uiso 0.50 1 calc PR A 2 
C81 C 0.9450 1.0048 0.2607 0.059 Uani 0.50 1 d P A 2 
H81A H 0.9522 0.9754 0.2021 0.071 Uiso 0.50 1 calc PR A 2 
C82 C 1.0886 1.0187 0.2981 0.050 Uani 0.50 1 d P A 2 
H82A H 1.1243 0.9853 0.3444 0.075 Uiso 0.50 1 calc PR A 2 
H82B H 1.0997 1.0580 0.3363 0.075 Uiso 0.50 1 calc PR A 2 
H82C H 1.1255 1.0208 0.2353 0.075 Uiso 0.50 1 calc PR A 2 
C83 C 0.9013 1.0636 0.1860 0.069 Uani 0.50 1 d P A 2 
C84 C 0.8429 1.1733 0.1802 0.050 Uani 0.50 1 d P A 2 
H84A H 0.8278 1.2030 0.2338 0.075 Uiso 0.50 1 calc PR A 2 
H84B H 0.7723 1.1684 0.1263 0.075 Uiso 0.50 1 calc PR A 2 
H84C H 0.9069 1.1884 0.1468 0.075 Uiso 0.50 1 calc PR A 2 
Cl Cl 0.5254(9) 0.8050(6) 0.1880(11) 0.258(6) Uani 1 1 d . . . 
O102 O 1.1117(10) 0.8344(7) 0.7510(10) 0.115(5) Uani 1 1 d . . . 
C102 C 1.1223(15) 0.7800(9) 0.8073(11) 0.099(6) Uani 1 1 d . . . 
O101 O 0.3372(9) 0.7431(5) 0.0170(16) 0.149(7) Uani 1 1 d . . . 
O104 O 0.4458(14) 0.6634(5) 0.2249(8) 0.128(6) Uani 1 1 d . . . 
O103 O 0.2672(18) 0.6246(12) 0.1173(14) 0.092(7) Uani 0.50 1 d P . . 
 
loop_ 
 _atom_site_aniso_label 
 _atom_site_aniso_U_11 
 _atom_site_aniso_U_22 
 _atom_site_aniso_U_33 
 _atom_site_aniso_U_23 
 _atom_site_aniso_U_13 
 _atom_site_aniso_U_12 
Co 0.0251(6) 0.0260(6) 0.0385(7) 0.0017(6) 0.0050(4) -0.0021(6) 
O21 0.082(7) 0.171(12) 0.068(7) -0.015(7) 0.007(5) 0.066(8) 
O22 0.052(5) 0.048(5) 0.073(6) 0.001(4) -0.025(4) 0.006(4) 
O31 0.054(5) 0.049(6) 0.127(8) -0.023(5) 0.016(5) -0.005(4) 
O32 0.097(7) 0.081(8) 0.106(8) -0.026(7) -0.028(6) 0.026(6) 
O41 0.145(10) 0.091(9) 0.060(6) 0.017(5) -0.011(6) -0.062(7) 
O42 0.053(5) 0.138(10) 0.064(5) 0.048(6) 0.013(4) -0.012(5) 
O51 0.079(6) 0.047(5) 0.087(7) 0.004(5) 0.020(5) 0.011(5) 
O52 0.102(7) 0.123(9) 0.060(6) -0.024(6) 0.039(5) 0.007(7) 
O61 0.064(5) 0.048(5) 0.095(7) 0.005(5) 0.038(5) 0.006(4) 
O62 0.090(6) 0.059(6) 0.060(5) -0.005(4) 0.018(4) 0.019(4) 
N1 0.051(4) 0.022(4) 0.034(4) -0.001(4) -0.001(3) 0.005(5) 
N2 0.025(4) 0.031(5) 0.040(5) -0.006(4) -0.002(3) 0.001(3) 
N3 0.038(4) 0.033(4) 0.038(4) 0.004(5) 0.017(3) 0.003(5) 
N4 0.030(4) 0.023(4) 0.040(5) 0.005(4) 0.012(3) 0.005(3) 
N5 0.037(4) 0.034(5) 0.057(5) -0.005(4) 0.022(4) -0.001(4) 
C1 0.060(7) 0.037(7) 0.032(6) 0.006(5) 0.000(5) 0.001(5) 
C2 0.096(10) 0.057(9) 0.029(6) -0.007(5) -0.004(6) 0.018(7) 
C3 0.086(10) 0.035(8) 0.043(7) -0.012(5) 0.005(6) 0.007(6) 
C4 0.063(8) 0.036(7) 0.056(8) -0.014(6) -0.001(6) -0.006(6) 
C5 0.046(6) 0.025(6) 0.039(6) -0.001(4) 0.001(5) -0.002(4) 
C6 0.035(5) 0.019(5) 0.051(6) -0.002(4) -0.002(5) -0.010(4) 
C7 0.028(5) 0.043(6) 0.049(6) -0.016(5) 0.004(5) 0.003(4) 
C8 0.024(5) 0.035(6) 0.065(7) 0.008(5) 0.004(5) 0.010(4) 
C9 0.023(5) 0.034(5) 0.040(5) 0.001(4) 0.001(4) 0.005(4) 
C10 0.031(5) 0.030(5) 0.037(5) 0.005(4) 0.006(4) 0.000(4) 
C11 0.025(5) 0.050(7) 0.039(6) 0.004(5) 0.000(4) -0.005(4) 
C12 0.054(7) 0.075(9) 0.030(5) 0.004(5) 0.010(5) 0.012(6) 
C13 0.053(6) 0.043(6) 0.035(6) -0.005(5) 0.014(5) 0.015(5) 
C14 0.046(6) 0.029(6) 0.045(6) 0.011(4) 0.021(5) 0.012(4) 
C15 0.035(5) 0.036(6) 0.041(6) 0.001(4) 0.017(4) -0.007(4) 
C16 0.022(4) 0.027(5) 0.060(6) -0.004(5) 0.012(4) -0.006(4) 
C17 0.033(5) 0.032(6) 0.065(7) 0.008(5) 0.023(5) 0.018(4) 
C18 0.036(5) 0.024(5) 0.037(5) 0.011(4) 0.007(4) -0.001(4) 
C19 0.032(5) 0.028(5) 0.038(5) 0.003(4) 0.007(4) 0.004(4) 
C20 0.037(6) 0.027(6) 0.049(6) 0.005(5) 0.000(5) 0.001(4) 
C21 0.032(5) 0.040(6) 0.051(6) -0.022(5) 0.004(5) -0.008(5) 
C22 0.032(5) 0.034(6) 0.054(7) -0.021(5) -0.011(5) 0.004(4) 
C23 0.059(7) 0.050(8) 0.074(9) -0.020(6) 0.000(6) -0.005(6) 
C24 0.055(7) 0.050(8) 0.073(9) 0.003(6) -0.019(6) -0.017(6) 
C25 0.042(6) 0.042(6) 0.042(6) -0.022(5) 0.004(5) -0.004(5) 
C26 0.065(8) 0.045(7) 0.040(6) 0.005(5) -0.003(6) -0.001(6) 
C27 0.055(8) 0.089(12) 0.135(15) -0.014(10) -0.023(9) 0.024(8) 
C31 0.040(5) 0.036(6) 0.046(6) 0.008(5) 0.011(5) 0.008(4) 
C32 0.046(6) 0.064(8) 0.042(6) 0.000(5) 0.008(5) 0.012(5) 
C33 0.104(11) 0.053(9) 0.066(8) -0.005(6) 0.016(8) 0.015(8) 
C34 0.036(6) 0.066(8) 0.073(8) -0.013(6) 0.007(6) 0.006(5) 
C35 0.057(7) 0.037(7) 0.054(7) -0.005(5) -0.008(5) 0.012(5) 
C36 0.066(9) 0.132(16) 0.043(7) 0.038(9) 0.005(7) 0.036(9) 
C37 0.129(15) 0.056(10) 0.28(3) 0.076(13) 0.144(18) 0.048(10) 
C41 0.040(6) 0.026(5) 0.064(7) -0.013(5) 0.023(5) -0.002(4) 
C42 0.046(6) 0.064(8) 0.073(8) -0.008(6) 0.025(6) 0.001(6) 
C43 0.079(10) 0.055(9) 0.155(16) -0.029(9) 0.044(10) 0.022(8) 
C44 0.041(6) 0.079(10) 0.061(7) 0.026(7) 0.010(5) 0.007(6) 
C45 0.034(6) 0.090(10) 0.042(6) -0.001(6) 0.019(5) 0.016(6) 
C46 0.045(7) 0.084(10) 0.050(7) 0.016(7) 0.011(6) -0.005(6) 
C47 0.075(10) 0.151(18) 0.125(15) 0.100(14) 0.011(10) -0.009(11) 
C51 0.054(7) 0.048(7) 0.049(7) 0.000(5) 0.010(5) 0.004(5) 
C52 0.075(8) 0.038(7) 0.074(8) 0.022(6) 0.034(7) 0.018(6) 
C53 0.075(8) 0.049(7) 0.060(8) -0.005(6) 0.034(7) -0.010(6) 
C54 0.101(11) 0.038(7) 0.105(11) 0.027(7) 0.058(9) 0.029(7) 
C55 0.059(7) 0.057(7) 0.034(6) 0.009(5) 0.019(5) 0.003(6) 
C56 0.091(10) 0.048(8) 0.053(8) 0.004(6) 0.022(7) 0.030(7) 
C57 0.133(17) 0.29(4) 0.105(15) -0.040(18) 0.066(13) 0.08(2) 
C61 0.053(7) 0.050(7) 0.040(6) 0.016(5) 0.011(5) 0.005(5) 
C62 0.038(6) 0.034(6) 0.093(9) -0.012(6) 0.028(6) -0.005(5) 
C63 0.059(7) 0.034(6) 0.054(7) 0.012(5) 0.019(5) 0.000(5) 
C64 0.127(13) 0.060(9) 0.082(10) -0.012(8) 0.052(9) 0.015(9) 
O72 0.034 0.026 0.057 -0.006 -0.010 0.005 
O71 0.051 0.078 0.032 -0.001 -0.013 -0.025 
N6 0.017 0.033 0.056 0.002 -0.012 -0.011 
C71 0.019 0.023 0.028 -0.001 -0.007 0.009 
C72 0.029 0.065 0.014 -0.012 0.009 -0.005 
C73 0.004 0.030 0.053 0.006 -0.010 0.000 
C74 0.050 0.050 0.050 0.000 0.009 0.000 
O81 0.084 0.049 0.228 -0.057 0.035 0.007 
O82 0.051 0.115 0.015 0.013 0.008 -0.023 
N7 0.017 0.033 0.056 0.002 -0.012 -0.011 
C81 0.052 0.045 0.078 -0.031 0.005 -0.005 
C82 0.029 0.116 0.007 -0.017 0.009 -0.023 
C83 0.036 0.062 0.106 -0.018 0.008 0.011 
C84 0.050 0.050 0.050 0.000 0.009 0.000 
Cl 0.179(8) 0.186(10) 0.429(18) -0.074(10) 0.105(9) -0.029(7) 
O102 0.103(8) 0.150(13) 0.106(9) -0.057(9) 0.054(7) -0.045(8) 
C102 0.131(13) 0.129(14) 0.064(9) 0.051(9) 0.089(10) 0.075(11) 
O101 0.061(6) 0.039(6) 0.37(2) 0.005(9) 0.090(10) 0.012(5) 
O104 0.283(16) 0.054(6) 0.087(7) -0.046(5) 0.145(9) -0.071(8) 
O103 0.084(13) 0.15(2) 0.050(10) -0.010(11) 0.031(10) 0.046(13) 
 
_geom_special_details 
; 
 All esds (except the esd in the dihedral angle between two l.s. planes) 
 are estimated using the full covariance matrix.  The cell esds are taken 
 into account individually in the estimation of esds in distances, angles 
 and torsion angles; correlations between esds in cell parameters are only 
 used when they are defined by crystal symmetry.  An approximate (isotropic) 
 treatment of cell esds is used for estimating esds involving l.s. planes. 
; 
 
loop_ 
 _geom_bond_atom_site_label_1 
 _geom_bond_atom_site_label_2 
 _geom_bond_distance 
 _geom_bond_site_symmetry_2 
 _geom_bond_publ_flag 
Co N3 1.936(7) . ? 
Co N4 1.949(7) . ? 
Co N2 1.952(8) . ? 
Co N1 1.955(7) . ? 
Co N7 1.9847(16) . ? 
Co N6 1.9878(19) . ? 
Co N5 1.995(8) . ? 
O21 C26 1.192(14) . ? 
O22 C26 1.317(13) . ? 
O22 C27 1.479(17) . ? 
O31 C36 1.356(15) . ? 
O31 C37 1.54(2) . ? 
O32 C36 1.213(18) . ? 
O41 C46 1.197(16) . ? 
O42 C46 1.360(14) . ? 
O42 C47 1.48(2) . ? 
O51 C56 1.210(14) . ? 
O52 C56 1.310(15) . ? 
O52 C57 1.45(2) . ? 
O61 C63 1.204(13) . ? 
O62 C63 1.321(13) . ? 
O62 C64 1.436(15) . ? 
N1 C4 1.379(14) . ? 
N1 C1 1.386(13) . ? 
N2 C9 1.356(11) . ? 
N2 C6 1.370(12) . ? 
N3 C11 1.364(13) . ? 
N3 C14 1.399(13) . ? 
N4 C19 1.347(12) . ? 
N4 C16 1.394(12) . ? 
N5 C61 1.477(13) . ? 
C1 C20 1.375(15) . ? 
C1 C2 1.469(16) . ? 
C2 C3 1.368(16) . ? 
C3 C4 1.428(17) . ? 
C4 C5 1.417(15) . ? 
C5 C6 1.370(14) . ? 
C5 C21 1.506(14) . ? 
C6 C7 1.443(14) . ? 
C7 C8 1.370(15) . ? 
C8 C9 1.454(14) . ? 
C9 C10 1.404(13) . ? 
C10 C11 1.368(14) . ? 
C10 C31 1.486(13) . ? 
C11 C12 1.465(14) . ? 
C12 C13 1.314(15) . ? 
C13 C14 1.457(14) . ? 
C14 C15 1.394(14) . ? 
C15 C16 1.377(14) . ? 
C15 C41 1.489(13) . ? 
C16 C17 1.480(14) . ? 
C17 C18 1.334(14) . ? 
C18 C19 1.460(13) . ? 
C19 C20 1.379(14) . ? 
C20 C51 1.501(15) . ? 
C21 C22 1.471(15) . ? 
C21 C25 1.541(14) . ? 
C22 C23 1.520(16) . ? 
C22 C24 1.527(17) . ? 
C22 C25 1.549(15) . ? 
C25 C26 1.420(16) . ? 
C31 C35 1.478(15) . ? 
C31 C32 1.507(14) . ? 
C32 C34 1.486(16) . ? 
C32 C35 1.493(16) . ? 
C32 C33 1.550(18) . ? 
C35 C36 1.42(2) . ? 
C41 C42 1.513(15) . ? 
C41 C45 1.570(15) . ? 
C42 C43 1.509(18) . ? 
C42 C44 1.514(17) . ? 
C42 C45 1.523(17) . ? 
C45 C46 1.453(19) . ? 
C51 C52 1.522(17) . ? 
C51 C55 1.549(15) . ? 
C52 C53 1.469(18) . ? 
C52 C55 1.511(17) . ? 
C52 C54 1.554(17) . ? 
C55 C56 1.508(17) . ? 
C61 C63 1.442(16) . ? 
C61 C62 1.539(15) . ? 
O72 C73 1.2004 . ? 
O71 C73 1.3604 . ? 
O71 C74 1.4060 . ? 
N6 C71 1.1587 . ? 
C71 C72 1.4821 . ? 
C71 C73 1.4943 . ? 
O81 C83 1.2099 . ? 
O81 C84 1.5213 . ? 
O82 C83 1.1441 . ? 
N7 C81 0.9683 . ? 
C81 C83 1.5861 . ? 
C81 C82 1.6465 . ? 
O102 C102 1.348(19) . ? 
 
loop_ 
 _geom_angle_atom_site_label_1 
 _geom_angle_atom_site_label_2 
 _geom_angle_atom_site_label_3 
 _geom_angle 
 _geom_angle_site_symmetry_1 
 _geom_angle_site_symmetry_3 
 _geom_angle_publ_flag 
N3 Co N4 91.1(3) . . ? 
N3 Co N2 89.4(3) . . ? 
N4 Co N2 179.1(3) . . ? 
N3 Co N1 179.5(4) . . ? 
N4 Co N1 89.3(3) . . ? 
N2 Co N1 90.2(3) . . ? 
N3 Co N7 78.9(2) . . ? 
N4 Co N7 86.8(2) . . ? 
N2 Co N7 92.5(3) . . ? 
N1 Co N7 101.4(2) . . ? 
N3 Co N6 99.3(2) . . ? 
N4 Co N6 90.7(3) . . ? 
N2 Co N6 88.5(3) . . ? 
N1 Co N6 80.9(2) . . ? 
N7 Co N6 20.916(19) . . ? 
N3 Co N5 85.3(3) . . ? 
N4 Co N5 91.2(3) . . ? 
N2 Co N5 89.6(3) . . ? 
N1 Co N5 94.4(3) . . ? 
N7 Co N5 164.0(2) . . ? 
N6 Co N5 174.9(2) . . ? 
C26 O22 C27 114.6(11) . . ? 
C36 O31 C37 111.0(15) . . ? 
C46 O42 C47 113.5(13) . . ? 
C56 O52 C57 113.7(13) . . ? 
C63 O62 C64 117.6(10) . . ? 
C4 N1 C1 107.8(7) . . ? 
C4 N1 Co 126.4(7) . . ? 
C1 N1 Co 125.8(7) . . ? 
C9 N2 C6 107.8(8) . . ? 
C9 N2 Co 125.4(6) . . ? 
C6 N2 Co 126.5(6) . . ? 
C11 N3 C14 106.5(7) . . ? 
C11 N3 Co 126.8(7) . . ? 
C14 N3 Co 126.8(6) . . ? 
C19 N4 C16 107.6(8) . . ? 
C19 N4 Co 127.9(6) . . ? 
C16 N4 Co 124.5(6) . . ? 
C61 N5 Co 124.5(7) . . ? 
C20 C1 N1 126.4(9) . . ? 
C20 C1 C2 124.6(10) . . ? 
N1 C1 C2 108.7(10) . . ? 
C3 C2 C1 105.4(12) . . ? 
C2 C3 C4 109.3(11) . . ? 
N1 C4 C5 125.2(10) . . ? 
N1 C4 C3 108.6(10) . . ? 
C5 C4 C3 125.9(10) . . ? 
C6 C5 C4 120.8(9) . . ? 
C6 C5 C21 119.2(9) . . ? 
C4 C5 C21 118.8(9) . . ? 
N2 C6 C5 126.8(9) . . ? 
N2 C6 C7 108.4(8) . . ? 
C5 C6 C7 124.6(9) . . ? 
C8 C7 C6 108.2(9) . . ? 
C7 C8 C9 105.2(8) . . ? 
N2 C9 C10 127.6(8) . . ? 
N2 C9 C8 110.2(8) . . ? 
C10 C9 C8 121.8(8) . . ? 
C11 C10 C9 119.1(8) . . ? 
C11 C10 C31 121.5(8) . . ? 
C9 C10 C31 119.1(8) . . ? 
N3 C11 C10 127.5(9) . . ? 
N3 C11 C12 108.8(9) . . ? 
C10 C11 C12 123.4(9) . . ? 
C13 C12 C11 108.4(9) . . ? 
C12 C13 C14 107.3(9) . . ? 
C15 C14 N3 124.9(8) . . ? 
C15 C14 C13 126.4(9) . . ? 
N3 C14 C13 108.8(8) . . ? 
C16 C15 C14 121.2(9) . . ? 
C16 C15 C41 118.9(9) . . ? 
C14 C15 C41 119.0(9) . . ? 
C15 C16 N4 127.4(9) . . ? 
C15 C16 C17 124.3(9) . . ? 
N4 C16 C17 108.0(9) . . ? 
C18 C17 C16 106.7(8) . . ? 
C17 C18 C19 108.0(8) . . ? 
N4 C19 C20 125.8(9) . . ? 
N4 C19 C18 109.6(8) . . ? 
C20 C19 C18 123.9(8) . . ? 
C1 C20 C19 121.4(9) . . ? 
C1 C20 C51 119.3(10) . . ? 
C19 C20 C51 117.9(9) . . ? 
C22 C21 C5 125.5(10) . . ? 
C22 C21 C25 61.8(7) . . ? 
C5 C21 C25 122.8(9) . . ? 
C21 C22 C23 116.4(10) . . ? 
C21 C22 C24 122.8(9) . . ? 
C23 C22 C24 113.4(10) . . ? 
C21 C22 C25 61.3(7) . . ? 
C23 C22 C25 114.9(9) . . ? 
C24 C22 C25 118.0(9) . . ? 
C26 C25 C21 122.6(9) . . ? 
C26 C25 C22 118.3(9) . . ? 
C21 C25 C22 56.9(7) . . ? 
O21 C26 O22 119.5(12) . . ? 
O21 C26 C25 128.9(11) . . ? 
O22 C26 C25 111.5(10) . . ? 
C35 C31 C10 123.7(9) . . ? 
C35 C31 C32 60.0(7) . . ? 
C10 C31 C32 126.0(9) . . ? 
C34 C32 C35 123.9(11) . . ? 
C34 C32 C31 122.7(9) . . ? 
C35 C32 C31 59.0(7) . . ? 
C34 C32 C33 112.5(10) . . ? 
C35 C32 C33 113.3(10) . . ? 
C31 C32 C33 115.6(11) . . ? 
C36 C35 C31 129.1(10) . . ? 
C36 C35 C32 127.6(12) . . ? 
C31 C35 C32 61.0(7) . . ? 
O32 C36 O31 118.6(18) . . ? 
O32 C36 C35 129.9(13) . . ? 
O31 C36 C35 111.5(14) . . ? 
C15 C41 C42 124.9(10) . . ? 
C15 C41 C45 120.8(9) . . ? 
C42 C41 C45 59.2(7) . . ? 
C43 C42 C41 114.3(10) . . ? 
C43 C42 C44 115.6(12) . . ? 
C41 C42 C44 122.4(10) . . ? 
C43 C42 C45 113.3(12) . . ? 
C41 C42 C45 62.3(7) . . ? 
C44 C42 C45 118.2(11) . . ? 
C46 C45 C42 123.4(10) . . ? 
C46 C45 C41 121.6(9) . . ? 
C42 C45 C41 58.5(7) . . ? 
O41 C46 O42 122.9(14) . . ? 
O41 C46 C45 127.1(11) . . ? 
O42 C46 C45 110.0(12) . . ? 
C20 C51 C52 123.6(10) . . ? 
C20 C51 C55 125.6(10) . . ? 
C52 C51 C55 58.9(8) . . ? 
C53 C52 C55 121.6(10) . . ? 
C53 C52 C51 122.6(10) . . ? 
C55 C52 C51 61.4(8) . . ? 
C53 C52 C54 113.9(12) . . ? 
C55 C52 C54 112.4(11) . . ? 
C51 C52 C54 115.0(12) . . ? 
C56 C55 C52 119.0(11) . . ? 
C56 C55 C51 122.4(10) . . ? 
C52 C55 C51 59.6(7) . . ? 
O51 C56 O52 124.4(12) . . ? 
O51 C56 C55 126.7(11) . . ? 
O52 C56 C55 108.5(11) . . ? 
C63 C61 N5 114.1(9) . . ? 
C63 C61 C62 108.5(9) . . ? 
N5 C61 C62 109.0(9) . . ? 
O61 C63 O62 122.8(11) . . ? 
O61 C63 C61 123.6(10) . . ? 
O62 C63 C61 113.4(9) . . ? 
C73 O71 C74 120.8 . . ? 
C71 N6 Co 162.82(8) . . ? 
N6 C71 C72 135.1 . . ? 
N6 C71 C73 107.8 . . ? 
C72 C71 C73 105.8 . . ? 
O72 C73 O71 122.8 . . ? 
O72 C73 C71 126.4 . . ? 
O71 C73 C71 110.6 . . ? 
C83 O81 C84 124.2 . . ? 
C81 N7 Co 168.66(12) . . ? 
N7 C81 C83 107.2 . . ? 
N7 C81 C82 145.6 . . ? 
C83 C81 C82 102.7 . . ? 
O82 C83 O81 116.0 . . ? 
O82 C83 C81 129.0 . . ? 
O81 C83 C81 114.9 . . ? 
 
loop_ 
 _geom_hbond_atom_site_label_D 
 _geom_hbond_atom_site_label_H 
 _geom_hbond_atom_site_label_A 
 _geom_hbond_distance_DH 
 _geom_hbond_distance_HA 
 _geom_hbond_distance_DA 
 _geom_hbond_angle_DHA 
 _geom_hbond_site_symmetry_A 
C71 H71A O21  0.98 2.05 2.999(13) 162.0 . 
C81 H81A O41  0.98 2.03 2.952(13) 156.9 . 
C61 H61 O51  0.98 2.43 3.290(14) 146.8 . 
C47 H47C O82  0.96 2.53 3.38(2) 146.7 . 
N5 H5B Cl  0.90 2.10 3.003(13) 176.5 . 
C62 H62A Cl  0.96 2.69 3.471(15) 138.8 . 
C84 H84B O101  0.96 2.55 3.275(17) 132.3 2_655 
 
_diffrn_measured_fraction_theta_max    0.997 
_diffrn_reflns_theta_full              23.28 
_diffrn_measured_fraction_theta_full   0.997 
_refine_diff_density_max    2.212 
_refine_diff_density_min   -0.713 
_refine_diff_density_rms    0.121 
#==END


data_Rile
 
_audit_creation_method            SHELXL-97
_chemical_name_systematic
;
 ?
;
_chemical_name_common             ?
_chemical_melting_point           ?
_chemical_formula_moiety          ?
_chemical_formula_sum
 'C64 H84 Cl7 Co N6 O12'
_chemical_formula_weight          1436.45
 
loop_
 _atom_type_symbol
 _atom_type_description
 _atom_type_scat_dispersion_real
 _atom_type_scat_dispersion_imag
 _atom_type_scat_source
 'C'  'C'   0.0033   0.0016
 'International Tables Vol C Tables 4.2.6.8 and 6.1.1.4'
 'H'  'H'   0.0000   0.0000
 'International Tables Vol C Tables 4.2.6.8 and 6.1.1.4'
 'N'  'N'   0.0061   0.0033
 'International Tables Vol C Tables 4.2.6.8 and 6.1.1.4'
 'O'  'O'   0.0106   0.0060
 'International Tables Vol C Tables 4.2.6.8 and 6.1.1.4'
 'Cl'  'Cl'   0.1484   0.1585
 'International Tables Vol C Tables 4.2.6.8 and 6.1.1.4'
 'Co'  'Co'   0.3494   0.9721
 'International Tables Vol C Tables 4.2.6.8 and 6.1.1.4'
 
_symmetry_cell_setting            Monoclinic
_symmetry_space_group_name_H-M    C2
 
loop_
 _symmetry_equiv_pos_as_xyz
 'x, y, z'
 '-x, y, -z'
 'x+1/2, y+1/2, z'
 '-x+1/2, y+1/2, -z'
 
_cell_length_a                    24.378(12)
_cell_length_b                    12.601(4)
_cell_length_c                    12.280(7)
_cell_angle_alpha                 90.00
_cell_angle_beta                  113.70(5)
_cell_angle_gamma                 90.00
_cell_volume                      3454(3)
_cell_formula_units_Z             2
_cell_measurement_temperature     193(2)
_cell_measurement_reflns_used     ?
_cell_measurement_theta_min       ?
_cell_measurement_theta_max       ?
 
_exptl_crystal_description        ?
_exptl_crystal_colour             ?
_exptl_crystal_size_max           0.1
_exptl_crystal_size_mid           0.2
_exptl_crystal_size_min           0.5
_exptl_crystal_density_meas       ?
_exptl_crystal_density_diffrn     1.381
_exptl_crystal_density_method     'not measured'
_exptl_crystal_F_000              1504
_exptl_absorpt_coefficient_mu     0.582
_exptl_absorpt_correction_type    none
_exptl_absorpt_correction_T_min   ?
_exptl_absorpt_correction_T_max   ?
_exptl_absorpt_process_details    ?
 
_exptl_special_details
;
 ?
;
 
_diffrn_ambient_temperature       193(2)
_diffrn_radiation_wavelength      0.71073
_diffrn_radiation_type            MoK\a
_diffrn_radiation_source          'fine-focus sealed tube'
_diffrn_radiation_monochromator   graphite
_diffrn_measurement_device_type   'CCD area detector'
_diffrn_measurement_method        'phi and omega scans'
_diffrn_detector_area_resol_mean  ?
_diffrn_standards_number          ?
_diffrn_standards_interval_count  ?
_diffrn_standards_interval_time   ?
_diffrn_standards_decay_%         ?
_diffrn_reflns_number             6793
_diffrn_reflns_av_R_equivalents   0.0416
_diffrn_reflns_av_sigmaI/netI     0.1066
_diffrn_reflns_limit_h_min        -32
_diffrn_reflns_limit_h_max        5
_diffrn_reflns_limit_k_min        -17
_diffrn_reflns_limit_k_max        13
_diffrn_reflns_limit_l_min        -10
_diffrn_reflns_limit_l_max        14
_diffrn_reflns_theta_min          1.99
_diffrn_reflns_theta_max          29.55
_reflns_number_total              5593
_reflns_number_gt                 3620
_reflns_threshold_expression      >2sigma(I)
 
_computing_data_collection        'Bruker SMART'
_computing_cell_refinement        'Bruker SMART'
_computing_data_reduction         'Bruker SHELXTL'
_computing_structure_solution     'SHELXS-97 (Sheldrick, 1990)'
_computing_structure_refinement   'SHELXL-97 (Sheldrick, 1997)'
_computing_molecular_graphics     'Bruker SHELXTL'
_computing_publication_material   'Bruker SHELXTL'
 
_refine_special_details
;
 Refinement of F^2^ against ALL reflections.  The weighted R-factor wR and
 goodness of fit S are based on F^2^, conventional R-factors R are based
 on F, with F set to zero for negative F^2^. The threshold expression of
 F^2^ > 2sigma(F^2^) is used only for calculating R-factors(gt) etc. and is
 not relevant to the choice of reflections for refinement.  R-factors based
 on F^2^ are statistically about twice as large as those based on F, and R-
 factors based on ALL data will be even larger.
;
 
_refine_ls_structure_factor_coef  Fsqd
_refine_ls_matrix_type            full
_refine_ls_weighting_scheme       calc
_refine_ls_weighting_details
 'calc w=1/[\s^2^(Fo^2^)+(0.0689P)^2^+0.0000P] where P=(Fo^2^+2Fc^2^)/3'
_atom_sites_solution_primary      direct
_atom_sites_solution_secondary    difmap
_atom_sites_solution_hydrogens    geom
_refine_ls_hydrogen_treatment     mixed
_refine_ls_extinction_method      none
_refine_ls_extinction_coef        ?
_refine_ls_abs_structure_details
 'Flack H D (1983), Acta Cryst. A39, 876-881'
_refine_ls_abs_structure_Flack    0.03(2)
_refine_ls_number_reflns          5593
_refine_ls_number_parameters      408
_refine_ls_number_restraints      1
_refine_ls_R_factor_all           0.0887
_refine_ls_R_factor_gt            0.0506
_refine_ls_wR_factor_ref          0.1266
_refine_ls_wR_factor_gt           0.1094
_refine_ls_goodness_of_fit_ref    0.899
_refine_ls_restrained_S_all       0.899
_refine_ls_shift/su_max           0.001
_refine_ls_shift/su_mean          0.000
 
loop_
 _atom_site_label
 _atom_site_type_symbol
 _atom_site_fract_x
 _atom_site_fract_y
 _atom_site_fract_z
 _atom_site_U_iso_or_equiv
 _atom_site_adp_type
 _atom_site_occupancy
 _atom_site_symmetry_multiplicity
 _atom_site_calc_flag
 _atom_site_refinement_flags
 _atom_site_disorder_assembly
 _atom_site_disorder_group
Co Co 0.5000 0.16899(7) 0.0000 0.0185(2) Uani 1 2 d S . .
O11 O 0.30987(15) 0.0137(4) 0.0555(4) 0.0462(11) Uani 1 1 d . . .
O12 O 0.28910(15) -0.0082(3) 0.2161(3) 0.0408(10) Uani 1 1 d . . .
O21 O 0.62353(16) 0.2746(4) 0.3838(4) 0.0451(11) Uani 1 1 d . . .
O22 O 0.6362(2) 0.3108(4) 0.5722(4) 0.0614(14) Uani 1 1 d . . .
O31 O 0.64975(16) 0.2788(3) -0.0670(3) 0.0404(10) Uani 1 1 d . . .
O32 O 0.63149(15) 0.3686(3) 0.0733(3) 0.0404(10) Uani 1 1 d . . .
N1 N 0.5000 0.0144(5) 0.0000 0.0157(13) Uani 1 2 d S . .
N2 N 0.47879(13) 0.1682(4) 0.1385(3) 0.0189(8) Uani 1 1 d . . .
N3 N 0.5000 0.3228(5) 0.0000 0.0221(14) Uani 1 2 d S . .
N4 N 0.58506(13) 0.1709(4) 0.1174(3) 0.0223(8) Uani 1 1 d . . .
H4A H 0.5882 0.2264 0.1682 0.027 Uiso 1 1 calc R . .
H4B H 0.5905 0.1099 0.1618 0.027 Uiso 1 1 calc R . .
C1 C 0.48369(19) -0.1599(5) 0.0334(5) 0.0305(14) Uani 1 1 d . . .
H1 H 0.4694 -0.2209 0.0591 0.037 Uiso 1 1 calc R . .
C2 C 0.47444(19) -0.0515(4) 0.0586(5) 0.0226(12) Uani 1 1 d . . .
C3 C 0.44970(18) -0.0186(4) 0.1377(4) 0.0230(12) Uani 1 1 d . . .
C4 C 0.45698(19) 0.0840(4) 0.1820(5) 0.0239(12) Uani 1 1 d . . .
C5 C 0.4508(2) 0.1163(5) 0.2878(5) 0.0294(13) Uani 1 1 d . . .
H5 H 0.4348 0.0747 0.3326 0.035 Uiso 1 1 calc R . .
C6 C 0.4718(2) 0.2160(4) 0.3130(5) 0.0287(13) Uani 1 1 d . . .
H6 H 0.4751 0.2568 0.3805 0.034 Uiso 1 1 calc R . .
C7 C 0.48822(18) 0.2489(4) 0.2174(4) 0.0218(11) Uani 1 1 d . . .
C8 C 0.50669(19) 0.3518(4) 0.2035(4) 0.0231(12) Uani 1 1 d . . .
C9 C 0.50628(19) 0.3868(4) 0.0939(4) 0.0234(12) Uani 1 1 d . . .
C10 C 0.5045(2) 0.4959(4) 0.0586(4) 0.0268(12) Uani 1 1 d . . .
H10 H 0.5087 0.5564 0.1074 0.032 Uiso 1 1 calc R . .
C11 C 0.42900(19) -0.1037(4) 0.1990(5) 0.0255(12) Uani 1 1 d . . .
H11 H 0.4624 -0.1296 0.2729 0.031 Uiso 1 1 calc R . .
C12 C 0.3844(2) -0.1897(4) 0.1396(5) 0.0307(13) Uani 1 1 d . . .
C13 C 0.3495(2) -0.1940(5) 0.0060(5) 0.0407(16) Uani 1 1 d . . .
H13A H 0.3647 -0.2522 -0.0271 0.061 Uiso 1 1 calc R . .
H13B H 0.3541 -0.1267 -0.0293 0.061 Uiso 1 1 calc R . .
H13C H 0.3070 -0.2060 -0.0121 0.061 Uiso 1 1 calc R . .
C14 C 0.3997(2) -0.2979(4) 0.1973(6) 0.0399(15) Uani 1 1 d . . .
H14A H 0.4227 -0.2895 0.2830 0.060 Uiso 1 1 calc R . .
H14B H 0.4237 -0.3373 0.1630 0.060 Uiso 1 1 calc R . .
H14C H 0.3627 -0.3370 0.1831 0.060 Uiso 1 1 calc R . .
C15 C 0.3690(2) -0.1047(4) 0.2111(5) 0.0282(13) Uani 1 1 d . . .
H15 H 0.3712 -0.1289 0.2903 0.034 Uiso 1 1 calc R . .
C16 C 0.3211(2) -0.0268(4) 0.1504(6) 0.0315(14) Uani 1 1 d . . .
C17 C 0.2389(2) 0.0625(6) 0.1621(6) 0.058(2) Uani 1 1 d . . .
H17A H 0.2180 0.0710 0.2151 0.087 Uiso 1 1 calc R . .
H17B H 0.2112 0.0328 0.0860 0.087 Uiso 1 1 calc R . .
H17C H 0.2532 0.1318 0.1484 0.087 Uiso 1 1 calc R . .
C21 C 0.5177(2) 0.4306(4) 0.3017(5) 0.0255(12) Uani 1 1 d . . .
H21 H 0.4799 0.4613 0.3021 0.031 Uiso 1 1 calc R . .
C22 C 0.5703(2) 0.5049(5) 0.3515(5) 0.0291(12) Uani 1 1 d . . .
C23 C 0.6205(2) 0.5051(5) 0.3063(5) 0.0376(15) Uani 1 1 d . . .
H23A H 0.6254 0.4334 0.2807 0.056 Uiso 1 1 calc R . .
H23B H 0.6580 0.5279 0.3704 0.056 Uiso 1 1 calc R . .
H23C H 0.6101 0.5541 0.2390 0.056 Uiso 1 1 calc R . .
C24 C 0.5582(3) 0.6104(5) 0.3942(5) 0.0448(16) Uani 1 1 d . . .
H24A H 0.5265 0.6027 0.4235 0.067 Uiso 1 1 calc R . .
H24B H 0.5455 0.6614 0.3283 0.067 Uiso 1 1 calc R . .
H24C H 0.5949 0.6362 0.4586 0.067 Uiso 1 1 calc R . .
C25 C 0.5656(2) 0.4102(4) 0.4265(5) 0.0304(13) Uani 1 1 d . . .
H25 H 0.5536 0.4288 0.4930 0.036 Uiso 1 1 calc R . .
C26 C 0.6104(2) 0.3243(5) 0.4532(6) 0.0416(16) Uani 1 1 d . . .
C27 C 0.6831(4) 0.2335(8) 0.6152(7) 0.113(4) Uani 1 1 d . . .
H27A H 0.6990 0.2308 0.7022 0.169 Uiso 1 1 calc R . .
H27B H 0.7153 0.2532 0.5903 0.169 Uiso 1 1 calc R . .
H27C H 0.6672 0.1637 0.5824 0.169 Uiso 1 1 calc R . .
C31 C 0.63847(16) 0.1792(5) 0.0854(4) 0.0240(12) Uani 1 1 d . . .
H31 H 0.6364 0.1218 0.0276 0.029 Uiso 1 1 calc R . .
C32 C 0.6378(2) 0.2854(5) 0.0298(5) 0.0285(13) Uani 1 1 d . . .
C33 C 0.6549(3) 0.3774(6) -0.1217(6) 0.056(2) Uani 1 1 d . . .
H33A H 0.6635 0.3627 -0.1916 0.084 Uiso 1 1 calc R . .
H33B H 0.6875 0.4198 -0.0646 0.084 Uiso 1 1 calc R . .
H33C H 0.6172 0.4169 -0.1461 0.084 Uiso 1 1 calc R . .
C34 C 0.69750(17) 0.1679(5) 0.1989(4) 0.0333(12) Uani 1 1 d . . .
H34 H 0.6945 0.2135 0.2629 0.040 Uiso 1 1 calc R . .
C35 C 0.7510(2) 0.2057(5) 0.1736(6) 0.0480(19) Uani 1 1 d . . .
H35A H 0.7880 0.1963 0.2450 0.072 Uiso 1 1 calc R . .
H35B H 0.7459 0.2809 0.1514 0.072 Uiso 1 1 calc R . .
H35C H 0.7534 0.1640 0.1082 0.072 Uiso 1 1 calc R . .
C36 C 0.7067(2) 0.0539(5) 0.2418(5) 0.0470(17) Uani 1 1 d . . .
H36A H 0.7165 0.0103 0.1849 0.056 Uiso 1 1 calc R . .
H36B H 0.6688 0.0266 0.2428 0.056 Uiso 1 1 calc R . .
C37 C 0.7564(3) 0.0413(8) 0.3653(6) 0.079(3) Uani 1 1 d . . .
H37A H 0.7611 -0.0340 0.3873 0.119 Uiso 1 1 calc R . .
H37B H 0.7462 0.0812 0.4230 0.119 Uiso 1 1 calc R . .
H37C H 0.7941 0.0684 0.3652 0.119 Uiso 1 1 calc R . .
C41 C 0.8853(3) 0.3842(6) 0.5821(6) 0.0502(17) Uani 1 1 d . . .
H41 H 0.9178 0.3505 0.5640 0.075 Uiso 1 1 calc R . .
Cl11 Cl 0.81557(8) 0.3489(2) 0.47158(17) 0.0780(7) Uani 1 1 d . . .
Cl12 Cl 0.89440(10) 0.52061(19) 0.5872(2) 0.0895(7) Uani 1 1 d . . .
Cl13 Cl 0.89003(10) 0.3390(2) 0.72102(17) 0.0846(7) Uani 1 1 d . . .
Cl1 Cl 1.0000 0.33016(19) 0.5000 0.0445(5) Uani 1 2 d S . .
 
loop_
 _atom_site_aniso_label
 _atom_site_aniso_U_11
 _atom_site_aniso_U_22
 _atom_site_aniso_U_33
 _atom_site_aniso_U_23
 _atom_site_aniso_U_13
 _atom_site_aniso_U_12
Co 0.0157(4) 0.0176(5) 0.0207(6) 0.000 0.0058(4) 0.000
O11 0.035(2) 0.048(3) 0.054(3) 0.022(2) 0.016(2) 0.0115(18)
O12 0.037(2) 0.039(3) 0.050(3) 0.000(2) 0.0217(19) 0.0041(18)
O21 0.047(2) 0.040(3) 0.036(3) -0.002(2) 0.004(2) 0.0135(19)
O22 0.086(3) 0.047(4) 0.025(3) 0.015(2) -0.005(2) 0.017(2)
O31 0.045(2) 0.044(3) 0.033(3) 0.000(2) 0.018(2) -0.0138(17)
O32 0.039(2) 0.031(3) 0.054(3) -0.009(2) 0.021(2) -0.0081(16)
N1 0.017(3) 0.018(4) 0.013(3) 0.000 0.006(2) 0.000
N2 0.0203(16) 0.019(2) 0.014(2) 0.005(2) 0.0037(15) -0.0039(19)
N3 0.024(3) 0.022(4) 0.019(4) 0.000 0.007(3) 0.000
N4 0.0190(16) 0.021(2) 0.022(2) -0.001(2) 0.0035(15) -0.0037(19)
C1 0.027(2) 0.018(3) 0.047(4) 0.004(3) 0.015(2) -0.004(2)
C2 0.018(2) 0.021(3) 0.027(3) 0.001(2) 0.007(2) -0.0024(19)
C3 0.014(2) 0.029(3) 0.022(3) 0.000(2) 0.004(2) -0.0008(19)
C4 0.020(2) 0.026(3) 0.024(3) -0.005(3) 0.008(2) -0.004(2)
C5 0.026(2) 0.035(4) 0.026(3) -0.002(3) 0.009(2) -0.008(2)
C6 0.033(3) 0.027(3) 0.025(4) -0.012(2) 0.010(2) -0.002(2)
C7 0.018(2) 0.023(3) 0.022(3) -0.005(2) 0.005(2) -0.001(2)
C8 0.022(2) 0.022(3) 0.025(3) 0.003(2) 0.009(2) 0.0027(19)
C9 0.021(2) 0.022(3) 0.026(4) 0.002(2) 0.008(2) 0.000(2)
C10 0.030(3) 0.017(3) 0.031(3) -0.005(3) 0.010(2) -0.002(2)
C11 0.024(2) 0.023(3) 0.029(3) 0.004(2) 0.011(2) 0.000(2)
C12 0.026(2) 0.025(3) 0.040(4) 0.003(3) 0.012(3) -0.002(2)
C13 0.035(3) 0.040(4) 0.045(4) -0.009(3) 0.014(3) -0.005(2)
C14 0.031(3) 0.030(4) 0.063(4) 0.006(3) 0.023(3) 0.000(2)
C15 0.031(2) 0.022(3) 0.035(4) 0.010(3) 0.016(2) -0.003(2)
C16 0.025(2) 0.020(3) 0.049(4) 0.000(3) 0.015(3) -0.010(2)
C17 0.034(3) 0.042(5) 0.092(6) -0.016(4) 0.019(3) 0.007(3)
C21 0.032(3) 0.022(3) 0.020(3) 0.000(2) 0.007(2) 0.001(2)
C22 0.036(3) 0.019(3) 0.027(3) -0.003(2) 0.006(2) 0.000(2)
C23 0.040(3) 0.035(4) 0.033(4) -0.002(3) 0.010(3) -0.004(3)
C24 0.055(3) 0.024(4) 0.044(4) -0.008(3) 0.008(3) -0.004(3)
C25 0.036(3) 0.029(4) 0.021(4) -0.003(2) 0.006(2) 0.003(2)
C26 0.046(3) 0.024(4) 0.046(5) -0.001(3) 0.009(3) -0.006(3)
C27 0.126(7) 0.079(8) 0.067(7) 0.022(5) -0.029(5) 0.051(6)
C31 0.021(2) 0.027(3) 0.021(3) -0.010(3) 0.0056(19) -0.004(2)
C32 0.021(2) 0.028(3) 0.032(4) 0.001(3) 0.007(2) -0.006(2)
C33 0.061(4) 0.062(6) 0.045(5) 0.008(4) 0.021(3) -0.023(3)
C34 0.0170(19) 0.036(3) 0.039(3) 0.007(3) 0.003(2) 0.000(3)
C35 0.021(2) 0.065(5) 0.049(4) -0.002(3) 0.005(3) -0.013(2)
C36 0.028(3) 0.051(5) 0.049(4) 0.020(3) 0.003(3) 0.004(3)
C37 0.046(4) 0.105(8) 0.063(5) 0.031(5) -0.004(3) 0.012(4)
C41 0.053(4) 0.038(5) 0.056(5) -0.005(3) 0.018(3) 0.004(3)
Cl11 0.0653(11) 0.101(2) 0.0553(13) -0.0194(12) 0.0112(9) -0.0172(10)
Cl12 0.0949(15) 0.0488(16) 0.135(2) -0.0105(14) 0.0568(14) -0.0143(11)
Cl13 0.1314(18) 0.0710(17) 0.0442(13) 0.0096(11) 0.0278(12) 0.0464(14)
Cl1 0.0530(11) 0.0450(15) 0.0361(14) 0.000 0.0187(10) 0.000
 
_geom_special_details
;
 All esds (except the esd in the dihedral angle between two l.s. planes)
 are estimated using the full covariance matrix.  The cell esds are taken
 into account individually in the estimation of esds in distances, angles
 and torsion angles; correlations between esds in cell parameters are only
 used when they are defined by crystal symmetry.  An approximate (isotropic)
 treatment of cell esds is used for estimating esds involving l.s. planes.
;
 
loop_
 _geom_bond_atom_site_label_1
 _geom_bond_atom_site_label_2
 _geom_bond_distance
 _geom_bond_site_symmetry_2
 _geom_bond_publ_flag
Co N3 1.939(7) . ?
Co N1 1.948(6) . ?
Co N2 1.966(3) 2_655 ?
Co N2 1.966(3) . ?
Co N4 1.994(3) . ?
Co N4 1.994(3) 2_655 ?
O11 C16 1.199(6) . ?
O12 C16 1.349(6) . ?
O12 C17 1.442(7) . ?
O21 C26 1.200(7) . ?
O22 C26 1.350(8) . ?
O22 C27 1.431(8) . ?
O31 C32 1.336(6) . ?
O31 C33 1.442(7) . ?
O32 C32 1.214(6) . ?
N1 C2 1.399(6) 2_655 ?
N1 C2 1.399(6) . ?
N2 C7 1.360(6) . ?
N2 C4 1.386(6) . ?
N3 C9 1.364(7) 2_655 ?
N3 C9 1.364(7) . ?
N4 C31 1.507(5) . ?
C1 C1 1.352(10) 2_655 ?
C1 C2 1.438(8) . ?
C2 C3 1.396(6) . ?
C3 C4 1.387(7) . ?
C3 C11 1.509(7) . ?
C4 C5 1.426(7) . ?
C5 C6 1.345(7) . ?
C6 C7 1.445(7) . ?
C7 C8 1.404(7) . ?
C8 C9 1.414(7) . ?
C8 C21 1.500(7) . ?
C9 C10 1.436(7) . ?
C10 C10 1.366(10) 2_655 ?
C11 C12 1.500(7) . ?
C11 C15 1.529(6) . ?
C12 C14 1.512(7) . ?
C12 C13 1.516(8) . ?
C12 C15 1.524(7) . ?
C15 C16 1.478(8) . ?
C21 C22 1.505(7) . ?
C21 C25 1.530(7) . ?
C22 C24 1.501(8) . ?
C22 C23 1.534(7) . ?
C22 C25 1.540(8) . ?
C25 C26 1.478(8) . ?
C31 C32 1.500(8) . ?
C31 C34 1.556(6) . ?
C34 C36 1.515(9) . ?
C34 C35 1.534(7) . ?
C36 C37 1.522(8) . ?
C41 Cl12 1.731(7) . ?
C41 Cl11 1.754(6) . ?
C41 Cl13 1.758(7) . ?
 
loop_
 _geom_angle_atom_site_label_1
 _geom_angle_atom_site_label_2
 _geom_angle_atom_site_label_3
 _geom_angle
 _geom_angle_site_symmetry_1
 _geom_angle_site_symmetry_3
 _geom_angle_publ_flag
N3 Co N1 180.0 . . ?
N3 Co N2 90.30(15) . 2_655 ?
N1 Co N2 89.70(15) . 2_655 ?
N3 Co N2 90.30(15) . . ?
N1 Co N2 89.70(15) . . ?
N2 Co N2 179.4(3) 2_655 . ?
N3 Co N4 89.32(15) . . ?
N1 Co N4 90.68(15) . . ?
N2 Co N4 93.84(14) 2_655 . ?
N2 Co N4 86.17(14) . . ?
N3 Co N4 89.32(15) . 2_655 ?
N1 Co N4 90.68(15) . 2_655 ?
N2 Co N4 86.18(14) 2_655 2_655 ?
N2 Co N4 93.83(14) . 2_655 ?
N4 Co N4 178.6(3) . 2_655 ?
C16 O12 C17 114.9(5) . . ?
C26 O22 C27 116.2(6) . . ?
C32 O31 C33 116.9(5) . . ?
C2 N1 C2 107.2(6) 2_655 . ?
C2 N1 Co 126.4(3) 2_655 . ?
C2 N1 Co 126.4(3) . . ?
C7 N2 C4 106.2(4) . . ?
C7 N2 Co 125.8(3) . . ?
C4 N2 Co 127.8(4) . . ?
C9 N3 C9 107.5(6) 2_655 . ?
C9 N3 Co 126.2(3) 2_655 . ?
C9 N3 Co 126.2(3) . . ?
C31 N4 Co 124.6(3) . . ?
C1 C1 C2 108.2(3) 2_655 . ?
C3 C2 N1 126.0(5) . . ?
C3 C2 C1 125.5(5) . . ?
N1 C2 C1 108.2(4) . . ?
C4 C3 C2 121.8(4) . . ?
C4 C3 C11 118.8(4) . . ?
C2 C3 C11 117.4(5) . . ?
N2 C4 C3 124.8(4) . . ?
N2 C4 C5 109.3(5) . . ?
C3 C4 C5 125.4(5) . . ?
C6 C5 C4 107.9(5) . . ?
C5 C6 C7 106.5(5) . . ?
N2 C7 C8 125.1(5) . . ?
N2 C7 C6 110.0(4) . . ?
C8 C7 C6 124.8(5) . . ?
C7 C8 C9 121.6(5) . . ?
C7 C8 C21 118.4(4) . . ?
C9 C8 C21 119.3(4) . . ?
N3 C9 C8 125.2(5) . . ?
N3 C9 C10 109.4(5) . . ?
C8 C9 C10 125.0(5) . . ?
C10 C10 C9 106.9(3) 2_655 . ?
C12 C11 C3 126.4(4) . . ?
C12 C11 C15 60.4(3) . . ?
C3 C11 C15 125.4(4) . . ?
C11 C12 C14 115.4(4) . . ?
C11 C12 C13 122.3(5) . . ?
C14 C12 C13 113.6(5) . . ?
C11 C12 C15 60.7(3) . . ?
C14 C12 C15 115.8(5) . . ?
C13 C12 C15 119.1(4) . . ?
C16 C15 C12 120.3(5) . . ?
C16 C15 C11 122.6(4) . . ?
C12 C15 C11 58.9(3) . . ?
O11 C16 O12 123.2(5) . . ?
O11 C16 C15 126.7(5) . . ?
O12 C16 C15 110.1(5) . . ?
C8 C21 C22 125.9(4) . . ?
C8 C21 C25 120.7(4) . . ?
C22 C21 C25 61.0(3) . . ?
C24 C22 C21 116.0(4) . . ?
C24 C22 C23 114.9(5) . . ?
C21 C22 C23 121.8(5) . . ?
C24 C22 C25 113.9(5) . . ?
C21 C22 C25 60.3(4) . . ?
C23 C22 C25 118.7(4) . . ?
C26 C25 C21 123.0(5) . . ?
C26 C25 C22 118.3(5) . . ?
C21 C25 C22 58.7(3) . . ?
O21 C26 O22 124.1(6) . . ?
O21 C26 C25 127.5(6) . . ?
O22 C26 C25 108.3(6) . . ?
C32 C31 N4 109.1(4) . . ?
C32 C31 C34 109.0(4) . . ?
N4 C31 C34 110.2(4) . . ?
O32 C32 O31 123.8(5) . . ?
O32 C32 C31 123.4(5) . . ?
O31 C32 C31 112.5(5) . . ?
C36 C34 C35 110.2(5) . . ?
C36 C34 C31 110.6(5) . . ?
C35 C34 C31 110.3(4) . . ?
C34 C36 C37 113.2(6) . . ?
Cl12 C41 Cl11 110.5(4) . . ?
Cl12 C41 Cl13 109.2(4) . . ?
Cl11 C41 Cl13 109.5(4) . . ?
 
loop_
 _geom_hbond_atom_site_label_D
 _geom_hbond_atom_site_label_H
 _geom_hbond_atom_site_label_A
 _geom_hbond_distance_DH
 _geom_hbond_distance_HA
 _geom_hbond_distance_DA
 _geom_hbond_angle_DHA
 _geom_hbond_site_symmetry_A
N4 H4A O21  0.92 2.51 3.290(6) 143.1 .
C11 H11 Cl1  1.00 2.61 3.494(6) 147.2 3_445
C27 H27C Cl12  0.98 2.71 3.629(11) 156.8 4_646
C31 H31 O11  1.00 2.38 3.268(7) 146.9 2_655
C41 H41 Cl1  1.00 2.44 3.400(6) 160.4 .
 
_diffrn_measured_fraction_theta_max    0.702
_diffrn_reflns_theta_full              29.55
_diffrn_measured_fraction_theta_full   0.702
_refine_diff_density_max    0.405
_refine_diff_density_min   -0.594
_refine_diff_density_rms    0.078
#==END


data_Rthr
 
_audit_creation_method            SHELXL-97
_chemical_name_systematic
;
 ?
;
_chemical_name_common             ?
_chemical_melting_point           ?
_chemical_formula_moiety          ?
_chemical_formula_sum
 'C59 H75.50 Cl4 Co N6 O14.25'
_chemical_formula_weight          1297.48
 
loop_
 _atom_type_symbol
 _atom_type_description
 _atom_type_scat_dispersion_real
 _atom_type_scat_dispersion_imag
 _atom_type_scat_source
 'C'  'C'   0.0033   0.0016
 'International Tables Vol C Tables 4.2.6.8 and 6.1.1.4'
 'H'  'H'   0.0000   0.0000
 'International Tables Vol C Tables 4.2.6.8 and 6.1.1.4'
 'N'  'N'   0.0061   0.0033
 'International Tables Vol C Tables 4.2.6.8 and 6.1.1.4'
 'O'  'O'   0.0106   0.0060
 'International Tables Vol C Tables 4.2.6.8 and 6.1.1.4'
 'Cl'  'Cl'   0.1484   0.1585
 'International Tables Vol C Tables 4.2.6.8 and 6.1.1.4'
 'Co'  'Co'   0.3494   0.9721
 'International Tables Vol C Tables 4.2.6.8 and 6.1.1.4'
 
_symmetry_cell_setting            Triclinic
_symmetry_space_group_name_H-M    P1
 
loop_
 _symmetry_equiv_pos_as_xyz
 'x, y, z'
 
_cell_length_a                    13.240(3)
_cell_length_b                    13.960(3)
_cell_length_c                    19.037(4)
_cell_angle_alpha                 71.581(4)
_cell_angle_beta                  77.543(4)
_cell_angle_gamma                 75.193(4)
_cell_volume                      3192.5(10)
_cell_formula_units_Z             2
_cell_measurement_temperature     193(2)
_cell_measurement_reflns_used     ?
_cell_measurement_theta_min       ?
_cell_measurement_theta_max       ?
 
_exptl_crystal_description        ?
_exptl_crystal_colour             ?
_exptl_crystal_size_max           0.08
_exptl_crystal_size_mid           0.25
_exptl_crystal_size_min           0.25
_exptl_crystal_density_meas       ?
_exptl_crystal_density_diffrn     1.350
_exptl_crystal_density_method     'not measured'
_exptl_crystal_F_000              1361
_exptl_absorpt_coefficient_mu     0.503
_exptl_absorpt_correction_type    none
_exptl_absorpt_correction_T_min   ?
_exptl_absorpt_correction_T_max   ?
_exptl_absorpt_process_details    ?
 
_exptl_special_details
;
 ?
;
 
_diffrn_ambient_temperature       193(2)
_diffrn_radiation_wavelength      0.71073
_diffrn_radiation_type            MoK\a
_diffrn_radiation_source          'fine-focus sealed tube'
_diffrn_radiation_monochromator   graphite
_diffrn_measurement_device_type   'CCD area detector'
_diffrn_measurement_method        'phi and omega scans'
_diffrn_detector_area_resol_mean  ?
_diffrn_standards_number          ?
_diffrn_standards_interval_count  ?
_diffrn_standards_interval_time   ?
_diffrn_standards_decay_%         ?
_diffrn_reflns_number             20131
_diffrn_reflns_av_R_equivalents   0.0914
_diffrn_reflns_av_sigmaI/netI     0.5062
_diffrn_reflns_limit_h_min        -17
_diffrn_reflns_limit_h_max        17
_diffrn_reflns_limit_k_min        -18
_diffrn_reflns_limit_k_max        15
_diffrn_reflns_limit_l_min        -24
_diffrn_reflns_limit_l_max        18
_diffrn_reflns_theta_min          1.61
_diffrn_reflns_theta_max          28.90
_reflns_number_total              17167
_reflns_number_gt                 4915
_reflns_threshold_expression      >2sigma(I)
 
_computing_data_collection        'Bruker SMART'
_computing_cell_refinement        'Bruker SMART'
_computing_data_reduction         'Bruker SHELXTL'
_computing_structure_solution     'SHELXS-97 (Sheldrick, 1990)'
_computing_structure_refinement   'SHELXL-97 (Sheldrick, 1997)'
_computing_molecular_graphics     'Bruker SHELXTL'
_computing_publication_material   'Bruker SHELXTL'
 
_refine_special_details
;
 Refinement of F^2^ against ALL reflections.  The weighted R-factor wR and
 goodness of fit S are based on F^2^, conventional R-factors R are based
 on F, with F set to zero for negative F^2^. The threshold expression of
 F^2^ > 2sigma(F^2^) is used only for calculating R-factors(gt) etc. and is
 not relevant to the choice of reflections for refinement.  R-factors based
 on F^2^ are statistically about twice as large as those based on F, and R-
 factors based on ALL data will be even larger.
;
 
_refine_ls_structure_factor_coef  Fsqd
_refine_ls_matrix_type            full
_refine_ls_weighting_scheme       calc
_refine_ls_weighting_details
 'calc w=1/[\s^2^(Fo^2^)+(0.0822P)^2^+0.0000P] where P=(Fo^2^+2Fc^2^)/3'
_atom_sites_solution_primary      direct
_atom_sites_solution_secondary    difmap
_atom_sites_solution_hydrogens    geom
_refine_ls_hydrogen_treatment     mixed
_refine_ls_extinction_method      none
_refine_ls_extinction_coef        ?
_refine_ls_abs_structure_details
 'Flack H D (1983), Acta Cryst. A39, 876-881'
_refine_ls_abs_structure_Flack    0.04(3)
_refine_ls_number_reflns          17167
_refine_ls_number_parameters      1450
_refine_ls_number_restraints      1505
_refine_ls_R_factor_all           0.2642
_refine_ls_R_factor_gt            0.0642
_refine_ls_wR_factor_ref          0.2150
_refine_ls_wR_factor_gt           0.1257
_refine_ls_goodness_of_fit_ref    0.790
_refine_ls_restrained_S_all       0.759
_refine_ls_shift/su_max           0.051
_refine_ls_shift/su_mean          0.001
 
loop_
 _atom_site_label
 _atom_site_type_symbol
 _atom_site_fract_x
 _atom_site_fract_y
 _atom_site_fract_z
 _atom_site_U_iso_or_equiv
 _atom_site_adp_type
 _atom_site_occupancy
 _atom_site_symmetry_multiplicity
 _atom_site_calc_flag
 _atom_site_refinement_flags
 _atom_site_disorder_assembly
 _atom_site_disorder_group
Co1 Co 0.65156(12) 0.37487(12) 0.59224(10) 0.0195(5) Uani 1 1 d U . .
O21 O 0.6280(7) 0.0668(7) 0.7503(5) 0.037(3) Uani 1 1 d U . .
O22 O 0.6712(7) -0.0409(7) 0.8603(6) 0.044(3) Uani 1 1 d U . .
O31 O 0.8712(7) 0.5029(8) 0.7452(6) 0.044(3) Uani 1 1 d U . .
O32 O 0.9078(8) 0.4191(8) 0.8629(6) 0.059(3) Uani 1 1 d U . .
O41 O 0.2645(7) 0.4221(7) 0.5278(6) 0.044(3) Uani 1 1 d U . .
O42 O 0.1978(8) 0.5303(7) 0.4260(6) 0.049(3) Uani 1 1 d U . .
O51 O 0.7947(7) 0.5610(7) 0.3600(6) 0.036(3) Uani 1 1 d U . .
O52 O 0.7432(8) 0.6434(7) 0.2477(6) 0.052(3) Uani 1 1 d U . .
O61 O 0.4830(8) 0.2656(7) 0.4781(6) 0.045(3) Uani 1 1 d U . .
O62 O 0.5807(7) 0.1310(7) 0.5525(6) 0.038(3) Uani 1 1 d U . .
O63 O 0.3576(7) 0.2465(7) 0.7188(5) 0.039(3) Uani 1 1 d U . .
H63O H 0.4060 0.2602 0.7340 0.059 Uiso 1 1 calc R . .
O71 O 0.9566(7) 0.3622(7) 0.5214(6) 0.040(3) Uani 1 1 d U . .
O72 O 0.9610(7) 0.3604(7) 0.6407(6) 0.038(3) Uani 1 1 d U . .
O73 O 0.7747(7) 0.6667(7) 0.5319(6) 0.051(3) Uani 1 1 d U . .
H73O H 0.7878 0.7244 0.5061 0.076 Uiso 1 1 calc R . .
N1 N 0.7467(7) 0.2724(8) 0.5428(6) 0.021(2) Uani 1 1 d U . .
N2 N 0.7189(7) 0.3152(8) 0.6800(6) 0.019(2) Uani 1 1 d U . .
N3 N 0.5529(8) 0.4750(8) 0.6405(6) 0.022(2) Uani 1 1 d U . .
N4 N 0.5845(7) 0.4356(7) 0.5027(6) 0.017(2) Uani 1 1 d U . .
N5 N 0.5556(7) 0.2754(7) 0.6390(6) 0.018(2) Uani 1 1 d U . .
H1N5 H 0.5992 0.2114 0.6507 0.022 Uiso 1 1 calc R . .
H2N5 H 0.5240 0.2884 0.6840 0.022 Uiso 1 1 calc R . .
N6 N 0.7449(7) 0.4764(7) 0.5417(6) 0.024(3) Uani 1 1 d U . .
H1N6 H 0.7760 0.4633 0.4967 0.029 Uiso 1 1 calc R . .
H2N6 H 0.7012 0.5403 0.5306 0.029 Uiso 1 1 calc R . .
C1 C 0.7684(10) 0.2848(11) 0.4666(9) 0.028(3) Uani 1 1 d U . .
C2 C 0.8441(10) 0.1928(10) 0.4556(9) 0.028(3) Uani 1 1 d U . .
H2 H 0.8775 0.1800 0.4091 0.033 Uiso 1 1 calc R . .
C3 C 0.8576(11) 0.1290(11) 0.5248(9) 0.033(4) Uani 1 1 d U . .
H3 H 0.8991 0.0611 0.5350 0.040 Uiso 1 1 calc R . .
C4 C 0.8004(10) 0.1795(11) 0.5790(9) 0.027(3) Uani 1 1 d U . .
C5 C 0.8102(10) 0.1450(10) 0.6560(9) 0.030(3) Uani 1 1 d U . .
C6 C 0.7808(9) 0.2138(10) 0.7027(8) 0.023(3) Uani 1 1 d U . .
C7 C 0.8116(11) 0.1965(11) 0.7732(8) 0.035(4) Uani 1 1 d U . .
H7 H 0.8531 0.1347 0.7996 0.043 Uiso 1 1 calc R . .
C8 C 0.7733(10) 0.2805(10) 0.7965(8) 0.035(4) Uani 1 1 d U . .
H8 H 0.7849 0.2898 0.8413 0.042 Uiso 1 1 calc R . .
C9 C 0.7118(10) 0.3542(10) 0.7433(7) 0.023(3) Uani 1 1 d U . .
C10 C 0.6418(10) 0.4476(10) 0.7490(8) 0.026(3) Uani 1 1 d U . .
C11 C 0.5656(10) 0.5018(9) 0.7032(8) 0.020(3) Uani 1 1 d U . .
C12 C 0.4806(10) 0.5788(10) 0.7185(8) 0.033(4) Uani 1 1 d U . .
H12 H 0.4705 0.6099 0.7579 0.039 Uiso 1 1 calc R . .
C13 C 0.4148(11) 0.6016(11) 0.6671(8) 0.033(4) Uani 1 1 d U . .
H13 H 0.3502 0.6508 0.6643 0.039 Uiso 1 1 calc R . .
C14 C 0.4611(10) 0.5374(9) 0.6180(8) 0.020(3) Uani 1 1 d U . .
C15 C 0.4246(9) 0.5478(9) 0.5514(7) 0.015(3) Uani 1 1 d U . .
C16 C 0.4877(9) 0.5053(9) 0.4949(8) 0.020(3) Uani 1 1 d U . .
C17 C 0.4705(11) 0.5348(10) 0.4201(7) 0.026(3) Uani 1 1 d U . .
H17 H 0.4087 0.5777 0.4010 0.031 Uiso 1 1 calc R . .
C18 C 0.5578(10) 0.4914(10) 0.3798(8) 0.025(3) Uani 1 1 d U . .
H18 H 0.5699 0.5019 0.3271 0.030 Uiso 1 1 calc R . .
C19 C 0.6265(10) 0.4283(10) 0.4300(8) 0.022(3) Uani 1 1 d U . .
C20 C 0.7200(10) 0.3612(10) 0.4140(7) 0.021(3) Uani 1 1 d U . .
C21 C 0.8631(10) 0.0386(10) 0.6921(8) 0.035(3) Uani 1 1 d U . .
H21 H 0.9394 0.0314 0.6946 0.042 Uiso 1 1 calc R . .
C22 C 0.8354(11) -0.0604(10) 0.6857(9) 0.041(4) Uani 1 1 d U . .
C23 C 0.7481(12) -0.0594(11) 0.6424(8) 0.045(4) Uani 1 1 d U . .
H23A H 0.7810 -0.0796 0.5965 0.068 Uiso 1 1 calc R . .
H23B H 0.7044 0.0101 0.6294 0.068 Uiso 1 1 calc R . .
H23C H 0.7038 -0.1082 0.6739 0.068 Uiso 1 1 calc R . .
C24 C 0.9318(13) -0.1500(12) 0.6894(11) 0.075(6) Uani 1 1 d U . .
H24A H 0.9505 -0.1672 0.6416 0.112 Uiso 1 1 calc R . .
H24B H 0.9147 -0.2103 0.7296 0.112 Uiso 1 1 calc R . .
H24C H 0.9915 -0.1295 0.6995 0.112 Uiso 1 1 calc R . .
C25 C 0.8048(11) -0.0304(10) 0.7612(9) 0.034(3) Uani 1 1 d U . .
H25 H 0.8486 -0.0735 0.8012 0.041 Uiso 1 1 calc R . .
C26 C 0.6914(11) 0.0072(10) 0.7881(9) 0.028(3) Uani 1 1 d U . .
C27 C 0.5616(11) -0.0090(13) 0.8885(9) 0.067(6) Uani 1 1 d U . .
H27A H 0.5477 -0.0455 0.9417 0.100 Uiso 1 1 calc R . .
H27B H 0.5171 -0.0252 0.8607 0.100 Uiso 1 1 calc R . .
H27C H 0.5456 0.0655 0.8825 0.100 Uiso 1 1 calc R . .
C31 C 0.6379(11) 0.4806(10) 0.8180(8) 0.033(3) Uani 1 1 d U . .
H31 H 0.5827 0.4533 0.8592 0.040 Uiso 1 1 calc R . .
C32 C 0.6469(11) 0.5873(11) 0.8176(8) 0.036(3) Uani 1 1 d U . .
C33 C 0.6764(13) 0.6681(11) 0.7456(8) 0.052(5) Uani 1 1 d U . .
H33A H 0.6134 0.7210 0.7326 0.079 Uiso 1 1 calc R . .
H33B H 0.7051 0.6352 0.7051 0.079 Uiso 1 1 calc R . .
H33C H 0.7297 0.7002 0.7529 0.079 Uiso 1 1 calc R . .
C34 C 0.5700(12) 0.6312(11) 0.8763(8) 0.052(5) Uani 1 1 d U . .
H34A H 0.5190 0.6903 0.8519 0.078 Uiso 1 1 calc R . .
H34B H 0.6086 0.6535 0.9048 0.078 Uiso 1 1 calc R . .
H34C H 0.5324 0.5782 0.9103 0.078 Uiso 1 1 calc R . .
C35 C 0.7344(10) 0.4904(10) 0.8498(8) 0.029(3) Uani 1 1 d U . .
H35 H 0.7277 0.4677 0.9056 0.035 Uiso 1 1 calc R . .
C36 C 0.8433(12) 0.4737(12) 0.8115(10) 0.039(4) Uani 1 1 d U . .
C37 C 1.0199(11) 0.3903(15) 0.8364(11) 0.096(7) Uani 1 1 d U . .
H37A H 1.0576 0.3534 0.8794 0.144 Uiso 1 1 calc R . .
H37B H 1.0477 0.4526 0.8084 0.144 Uiso 1 1 calc R . .
H37C H 1.0299 0.3457 0.8038 0.144 Uiso 1 1 calc R . .
C41 C 0.3236(10) 0.6204(10) 0.5407(8) 0.033(3) Uani 1 1 d U . .
H41 H 0.3326 0.6936 0.5231 0.040 Uiso 1 1 calc R . .
C42 C 0.2208(10) 0.6097(11) 0.5894(9) 0.035(3) Uani 1 1 d U . .
C43 C 0.2121(11) 0.5132(11) 0.6568(9) 0.045(4) Uani 1 1 d U . .
H43A H 0.2086 0.5308 0.7033 0.067 Uiso 1 1 calc R . .
H43B H 0.2741 0.4584 0.6514 0.067 Uiso 1 1 calc R . .
H43C H 0.1480 0.4892 0.6584 0.067 Uiso 1 1 calc R . .
C44 C 0.1522(10) 0.7064(10) 0.6052(9) 0.043(4) Uani 1 1 d U . .
H44A H 0.1508 0.7036 0.6575 0.065 Uiso 1 1 calc R . .
H44B H 0.0803 0.7126 0.5962 0.065 Uiso 1 1 calc R . .
H44C H 0.1807 0.7661 0.5721 0.065 Uiso 1 1 calc R . .
C45 C 0.2315(9) 0.6057(10) 0.5078(8) 0.028(3) Uani 1 1 d U . .
H45 H 0.1950 0.6690 0.4732 0.034 Uiso 1 1 calc R . .
C46 C 0.2356(10) 0.5061(11) 0.4920(9) 0.029(3) Uani 1 1 d U . .
C47 C 0.1974(13) 0.4452(12) 0.3993(10) 0.067(5) Uani 1 1 d U . .
H47A H 0.1675 0.4711 0.3524 0.101 Uiso 1 1 calc R . .
H47B H 0.1546 0.3994 0.4367 0.101 Uiso 1 1 calc R . .
H47C H 0.2699 0.4069 0.3904 0.101 Uiso 1 1 calc R . .
C51 C 0.7593(9) 0.3643(10) 0.3353(7) 0.023(3) Uani 1 1 d U . .
H51 H 0.7238 0.3254 0.3152 0.027 Uiso 1 1 calc R . .
C52 C 0.8715(10) 0.3705(11) 0.2966(8) 0.027(3) Uani 1 1 d U . .
C53 C 0.9524(10) 0.3741(11) 0.3379(9) 0.043(4) Uani 1 1 d U . .
H53A H 1.0043 0.3090 0.3450 0.065 Uiso 1 1 calc R . .
H53B H 0.9185 0.3844 0.3868 0.065 Uiso 1 1 calc R . .
H53C H 0.9879 0.4312 0.3092 0.065 Uiso 1 1 calc R . .
C54 C 0.9136(12) 0.3173(12) 0.2365(9) 0.056(5) Uani 1 1 d U . .
H54A H 0.8553 0.3175 0.2122 0.083 Uiso 1 1 calc R . .
H54B H 0.9480 0.2459 0.2584 0.083 Uiso 1 1 calc R . .
H54C H 0.9650 0.3533 0.1993 0.083 Uiso 1 1 calc R . .
C55 C 0.7767(10) 0.5607(11) 0.3014(9) 0.026(3) Uani 1 1 d U . .
C56 C 0.7837(11) 0.4660(10) 0.2783(8) 0.034(3) Uani 1 1 d U . .
H56 H 0.7610 0.4803 0.2285 0.041 Uiso 1 1 calc R . .
C57 C 0.7420(14) 0.7390(11) 0.2680(10) 0.071(6) Uani 1 1 d U . .
H57A H 0.7188 0.7997 0.2277 0.107 Uiso 1 1 calc R . .
H57B H 0.8132 0.7387 0.2751 0.107 Uiso 1 1 calc R . .
H57C H 0.6933 0.7411 0.3145 0.107 Uiso 1 1 calc R . .
C61 C 0.4704(9) 0.2621(10) 0.6065(7) 0.021(3) Uani 1 1 d U . .
H61 H 0.4238 0.3314 0.5905 0.025 Uiso 1 1 calc R . .
C62 C 0.5151(11) 0.2222(12) 0.5349(9) 0.026(3) Uani 1 1 d U . .
C63 C 0.6146(11) 0.0854(12) 0.4912(9) 0.048(5) Uani 1 1 d U . .
H63A H 0.6629 0.0191 0.5068 0.073 Uiso 1 1 calc R . .
H63B H 0.6511 0.1315 0.4488 0.073 Uiso 1 1 calc R . .
H63C H 0.5531 0.0747 0.4761 0.073 Uiso 1 1 calc R . .
C64 C 0.4026(10) 0.1917(10) 0.6644(8) 0.026(3) Uani 1 1 d U . .
H64 H 0.4500 0.1262 0.6880 0.031 Uiso 1 1 calc R . .
C65 C 0.3249(10) 0.1663(11) 0.6331(8) 0.039(4) Uani 1 1 d U . .
H65A H 0.3611 0.1307 0.5950 0.059 Uiso 1 1 calc R . .
H65B H 0.2773 0.2298 0.6103 0.059 Uiso 1 1 calc R . .
H65C H 0.2839 0.1213 0.6731 0.059 Uiso 1 1 calc R . .
C71 C 0.8313(9) 0.4864(10) 0.5767(8) 0.027(3) Uani 1 1 d U . .
H71 H 0.8046 0.4879 0.6298 0.032 Uiso 1 1 calc R . .
C72 C 0.9226(11) 0.3974(11) 0.5741(10) 0.029(3) Uani 1 1 d U . .
C73 C 1.0561(10) 0.2782(12) 0.6436(10) 0.060(5) Uani 1 1 d U . .
H73A H 1.0779 0.2578 0.6932 0.090 Uiso 1 1 calc R . .
H73B H 1.1130 0.3034 0.6053 0.090 Uiso 1 1 calc R . .
H73C H 1.0407 0.2186 0.6343 0.090 Uiso 1 1 calc R . .
C74 C 0.8670(10) 0.5910(11) 0.5297(9) 0.040(4) Uani 1 1 d U . .
H74 H 0.8923 0.5887 0.4767 0.048 Uiso 1 1 calc R . .
C75 C 0.95618(11) 0.60878(11) 0.56082(9) 0.040(4) Uani 1 1 d U . .
H75A H 0.9771 0.6735 0.5299 0.060 Uiso 1 1 calc R . .
H75B H 1.0170 0.5515 0.5601 0.060 Uiso 1 1 calc R . .
H75C H 0.9315 0.6128 0.6124 0.060 Uiso 1 1 calc R . .
Co2 Co 0.45758(11) 0.04940(11) 0.16512(9) 0.0206(5) Uani 1 1 d RU . .
O121 O 0.31500(11) 0.29822(11) -0.02440(9) 0.040(3) Uani 1 1 d RU . .
O122 O 0.36787(11) 0.42060(11) -0.12266(9) 0.044(3) Uani 1 1 d RU . .
O131 O 0.84712(11) 0.12327(11) 0.10828(9) 0.044(3) Uani 1 1 d RU . .
O132 O 0.91914(11) 0.23416(11) 0.00695(9) 0.048(3) Uani 1 1 d RU . .
O141 O 0.25092(11) -0.22602(11) 0.14685(9) 0.044(3) Uani 1 1 d RU . .
O142 O 0.21204(11) -0.36406(11) 0.23939(9) 0.058(3) Uani 1 1 d RU . .
O151 O 0.46947(11) -0.04223(11) 0.40815(9) 0.037(3) Uani 1 1 d RU . .
O152 O 0.43299(11) -0.16667(11) 0.51521(9) 0.036(3) Uani 1 1 d RU . .
O161 O 0.14825(11) -0.02261(11) 0.20102(9) 0.041(3) Uani 1 1 d RU . .
O162 O 0.15213(11) 0.14872(11) 0.15511(9) 0.042(3) Uani 1 1 d RU . .
O163 O 0.32496(11) 0.03042(11) -0.03145(9) 0.041(3) Uani 1 1 d RU . .
H16O H 0.3080 0.0484 -0.0745 0.062 Uiso 1 1 calc R . .
O171 O 0.6246(7) 0.2663(7) 0.1877(5) 0.036(3) Uani 1 1 d U . .
O172 O 0.5111(7) 0.2062(7) 0.2894(6) 0.035(3) Uani 1 1 d U . .
O173 O 0.7489(6) -0.0668(7) 0.2929(6) 0.042(3) Uani 1 1 d U . .
H17O H 0.7039 -0.1005 0.2941 0.062 Uiso 1 1 calc R . .
N101 N 0.3603 0.1513 0.2074 0.023 Uani 1 1 d U . .
N102 N 0.5261 0.1584 0.0952 0.017 Uiso 1 1 d U . .
N103 N 0.5562 -0.0558 0.1218 0.036 Uani 1 1 d U . .
N104 N 0.3880 -0.0603 0.2372 0.029 Uani 1 1 d U . .
N105 N 0.3629(7) 0.0808(7) 0.0871(6) 0.018(2) Uani 1 1 d U . .
H3N5 H 0.3328 0.1498 0.0783 0.022 Uiso 1 1 calc R . .
H4N5 H 0.4070 0.0732 0.0439 0.022 Uiso 1 1 calc R . .
N106 N 0.5532(7) 0.0236(7) 0.2424(6) 0.025(3) Uani 1 1 d U . .
H3N6 H 0.5087 0.0283 0.2860 0.030 Uiso 1 1 calc R . .
H4N6 H 0.5869 -0.0444 0.2503 0.030 Uiso 1 1 calc R . .
C101 C 0.2975(9) 0.1353(10) 0.2773(7) 0.019(3) Uani 1 1 d U . .
C102 C 0.2333(10) 0.2296(10) 0.2880(8) 0.027(4) Uani 1 1 d U . .
H102 H 0.1864 0.2386 0.3319 0.033 Uiso 1 1 calc R . .
C103 C 0.2522(10) 0.3064(11) 0.2220(9) 0.030(4) Uani 1 1 d U . .
H103 H 0.2192 0.3774 0.2113 0.036 Uiso 1 1 calc R . .
C104 C 0.3311(10) 0.2568(10) 0.1741(8) 0.026(3) Uani 1 1 d U . .
C105 C 0.3852(9) 0.3087(9) 0.1071(7) 0.017(3) Uani 1 1 d U . .
C106 C 0.4808(10) 0.2608(9) 0.0741(8) 0.025(3) Uani 1 1 d U . .
C107 C 0.5540(10) 0.3157(11) 0.0185(8) 0.032(4) Uani 1 1 d U . .
H107 H 0.5431 0.3879 -0.0045 0.038 Uiso 1 1 calc R . .
C108 C 0.6423(11) 0.2439(10) 0.0052(8) 0.030(4) Uani 1 1 d U . .
H108 H 0.7052 0.2582 -0.0275 0.036 Uiso 1 1 calc R . .
C109 C 0.6245(9) 0.1432(10) 0.0489(7) 0.022(3) Uani 1 1 d U . .
C110 C 0.6865(9) 0.0501(10) 0.0430(7) 0.024(3) Uani 1 1 d U . .
C111 C 0.6508(9) -0.0442(10) 0.0711(7) 0.018(3) Uani 1 1 d U . .
C112 C 0.7024(11) -0.1356(10) 0.0518(9) 0.034(4) Uani 1 1 d U . .
H112 H 0.7686 -0.1485 0.0215 0.041 Uiso 1 1 calc R . .
C113 C 0.6360(10) -0.2005(11) 0.0863(8) 0.035(4) Uani 1 1 d U . .
H113 H 0.6471 -0.2687 0.0823 0.042 Uiso 1 1 calc R . .
C114 C 0.5482(10) -0.1542(10) 0.1290(8) 0.026(3) Uani 1 1 d U . .
C115 C 0.4715(10) -0.2040(10) 0.1817(8) 0.027(3) Uani 1 1 d U . .
C116 C 0.4006(10) -0.1604(10) 0.2345(7) 0.022(3) Uani 1 1 d U . .
C117 C 0.3398(10) -0.2162(11) 0.3003(8) 0.033(4) Uani 1 1 d U . .
H117 H 0.3313 -0.2851 0.3109 0.040 Uiso 1 1 calc R . .
C118 C 0.2970(10) -0.1511(10) 0.3442(8) 0.027(3) Uani 1 1 d U . .
H118 H 0.2554 -0.1665 0.3921 0.033 Uiso 1 1 calc R . .
C119 C 0.3268(9) -0.0564(10) 0.3041(7) 0.023(3) Uani 1 1 d U . .
C120 C 0.2904(10) 0.0372(10) 0.3284(8) 0.026(3) Uani 1 1 d U . .
C121 C 0.3413(9) 0.4200(9) 0.0735(8) 0.025(3) Uani 1 1 d U . .
H121 H 0.3757 0.4668 0.0866 0.030 Uiso 1 1 calc R . .
C122 C 0.2328(10) 0.4697(11) 0.0559(8) 0.029(3) Uani 1 1 d U . .
C123 C 0.1489(10) 0.4079(9) 0.0707(8) 0.034(4) Uani 1 1 d U . .
H12A H 0.1815 0.3396 0.0635 0.051 Uiso 1 1 calc R . .
H12B H 0.0975 0.4435 0.0360 0.051 Uiso 1 1 calc R . .
H12C H 0.1130 0.4003 0.1223 0.051 Uiso 1 1 calc R . .
C124 C 0.1880(10) 0.5766(10) 0.0641(9) 0.037(4) Uani 1 1 d U . .
H12D H 0.2453 0.6140 0.0535 0.056 Uiso 1 1 calc R . .
H12E H 0.1520 0.5723 0.1154 0.056 Uiso 1 1 calc R . .
H12F H 0.1375 0.6130 0.0289 0.056 Uiso 1 1 calc R . .
C125 C 0.3225(10) 0.4575(10) -0.0076(8) 0.027(3) Uani 1 1 d U . .
H125 H 0.3474 0.5226 -0.0370 0.033 Uiso 1 1 calc R . .
C126 C 0.3335(10) 0.3825(11) -0.0522(8) 0.029(3) Uani 1 1 d U . .
C127 C 0.3696(14) 0.3559(13) -0.1693(9) 0.070(6) Uani 1 1 d U . .
H12G H 0.3989 0.3876 -0.2209 0.105 Uiso 1 1 calc R . .
H12H H 0.2975 0.3485 -0.1679 0.105 Uiso 1 1 calc R . .
H12I H 0.4135 0.2878 -0.1507 0.105 Uiso 1 1 calc R . .
C131 C 0.7887(9) 0.0454(10) -0.0123(8) 0.029(3) Uani 1 1 d U . .
H131 H 0.7769 0.0516 -0.0639 0.034 Uiso 1 1 calc R . .
C132 C 0.8914(10) -0.0246(10) 0.0071(9) 0.032(3) Uani 1 1 d U . .
C133 C 0.9015(10) -0.0911(11) 0.0877(9) 0.042(4) Uani 1 1 d U . .
H13A H 0.8562 -0.0542 0.1228 0.062 Uiso 1 1 calc R . .
H13B H 0.9751 -0.1055 0.0958 0.062 Uiso 1 1 calc R . .
H13C H 0.8795 -0.1562 0.0957 0.062 Uiso 1 1 calc R . .
C134 C 0.9587(9) -0.0752(10) -0.0514(9) 0.037(4) Uani 1 1 d U . .
H13D H 1.0228 -0.1196 -0.0321 0.056 Uiso 1 1 calc R . .
H13E H 0.9782 -0.0220 -0.0968 0.056 Uiso 1 1 calc R . .
H13F H 0.9188 -0.1168 -0.0633 0.056 Uiso 1 1 calc R . .
C135 C 0.8806(10) 0.0908(10) -0.0127(8) 0.030(3) Uani 1 1 d U . .
H135 H 0.9163 0.1210 -0.0641 0.036 Uiso 1 1 calc R . .
C136 C 0.8787(10) 0.1483(10) 0.0424(8) 0.026(3) Uani 1 1 d U . .
C137 C 0.9253(15) 0.2953(13) 0.0545(10) 0.080(6) Uani 1 1 d U . .
H13G H 0.9547 0.3556 0.0239 0.120 Uiso 1 1 calc R . .
H13H H 0.9709 0.2534 0.0921 0.120 Uiso 1 1 calc R . .
H13I H 0.8544 0.3180 0.0796 0.120 Uiso 1 1 calc R . .
C141 C 0.4809(10) -0.3195(10) 0.1897(8) 0.029(3) Uani 1 1 d U . .
H141 H 0.5353 -0.3654 0.2214 0.035 Uiso 1 1 calc R . .
C142 C 0.4766(10) -0.3586(10) 0.1225(9) 0.031(3) Uani 1 1 d U . .
C143 C 0.4486(11) -0.2851(11) 0.0473(8) 0.045(4) Uani 1 1 d U . .
H14A H 0.5119 -0.2855 0.0095 0.068 Uiso 1 1 calc R . .
H14B H 0.4211 -0.2151 0.0525 0.068 Uiso 1 1 calc R . .
H14C H 0.3947 -0.3076 0.0317 0.068 Uiso 1 1 calc R . .
C144 C 0.5566(11) -0.4585(10) 0.1204(9) 0.054(5) Uani 1 1 d U . .
H14D H 0.5667 -0.4996 0.1716 0.082 Uiso 1 1 calc R . .
H14E H 0.6241 -0.4422 0.0921 0.082 Uiso 1 1 calc R . .
H14F H 0.5304 -0.4978 0.0962 0.082 Uiso 1 1 calc R . .
C145 C 0.3889(10) -0.3724(10) 0.1929(8) 0.029(3) Uani 1 1 d U . .
H145 H 0.3945 -0.4443 0.2266 0.035 Uiso 1 1 calc R . .
C146 C 0.2762(10) -0.3109(11) 0.1877(9) 0.036(4) Uani 1 1 d U . .
C147 C 0.0990(11) -0.3094(14) 0.2439(12) 0.092(8) Uani 1 1 d U . .
H14G H 0.0558 -0.3530 0.2830 0.137 Uiso 1 1 calc R . .
H14H H 0.0750 -0.2947 0.1956 0.137 Uiso 1 1 calc R . .
H14I H 0.0920 -0.2445 0.2559 0.137 Uiso 1 1 calc R . .
C151 C 0.2316(9) 0.0233(10) 0.4058(7) 0.024(3) Uani 1 1 d U . .
H151 H 0.1587 0.0112 0.4114 0.029 Uiso 1 1 calc R . .
C152 C 0.2460(11) 0.0738(11) 0.4620(8) 0.031(3) Uani 1 1 d U . .
C153 C 0.3262(11) 0.1450(11) 0.4436(9) 0.045(4) Uani 1 1 d U . .
H15A H 0.3260 0.1663 0.4880 0.067 Uiso 1 1 calc R . .
H15B H 0.3062 0.2060 0.4026 0.067 Uiso 1 1 calc R . .
H15C H 0.3970 0.1076 0.4287 0.067 Uiso 1 1 calc R . .
C154 C 0.1507(11) 0.0992(12) 0.5163(9) 0.051(5) Uani 1 1 d U . .
H15D H 0.1057 0.0489 0.5268 0.076 Uiso 1 1 calc R . .
H15E H 0.1111 0.1685 0.4949 0.076 Uiso 1 1 calc R . .
H15F H 0.1727 0.0968 0.5629 0.076 Uiso 1 1 calc R . .
C155 C 0.2923(10) -0.0422(10) 0.4726(7) 0.024(3) Uani 1 1 d U . .
H155 H 0.2520 -0.0891 0.5137 0.028 Uiso 1 1 calc R . .
C156 C 0.4091(11) -0.0833(10) 0.4586(8) 0.031(3) Uani 1 1 d U . .
C157 C 0.5460(10) -0.2089(11) 0.5103(10) 0.062(6) Uani 1 1 d U . .
H15G H 0.5596 -0.2704 0.5524 0.093 Uiso 1 1 calc R . .
H15H H 0.5828 -0.1572 0.5120 0.093 Uiso 1 1 calc R . .
H15I H 0.5718 -0.2275 0.4631 0.093 Uiso 1 1 calc R . .
C161 C 0.2756(9) 0.0272(9) 0.0947(7) 0.017(3) Uani 1 1 d U . .
H161 H 0.3019 -0.0491 0.1104 0.021 Uiso 1 1 calc R . .
C162 C 0.1865(10) 0.0594(12) 0.1547(9) 0.032(4) Uani 1 1 d U . .
C163 C 0.0524(10) 0.0024(11) 0.2496(9) 0.055(5) Uani 1 1 d U . .
H16A H 0.0298 -0.0613 0.2810 0.082 Uiso 1 1 calc R . .
H16B H -0.0027 0.0452 0.2194 0.082 Uiso 1 1 calc R . .
H16C H 0.0647 0.0402 0.2814 0.082 Uiso 1 1 calc R . .
C164 C 0.2343(10) 0.0582(11) 0.0205(8) 0.030(3) Uani 1 1 d U . .
H164 H 0.2089 0.1346 0.0051 0.036 Uiso 1 1 calc R . .
C165 C 0.1455(10) 0.0060(11) 0.0219(9) 0.046(4) Uani 1 1 d U . .
H16D H 0.1199 0.0330 -0.0266 0.069 Uiso 1 1 calc R . .
H16E H 0.0874 0.0201 0.0614 0.069 Uiso 1 1 calc R . .
H16F H 0.1720 -0.0686 0.0319 0.069 Uiso 1 1 calc R . .
C171 C 0.6367(9) 0.0812(9) 0.2369(7) 0.021(3) Uani 1 1 d U . .
H171 H 0.6866 0.0780 0.1897 0.025 Uiso 1 1 calc R . .
C172 C 0.5898(12) 0.1947(11) 0.2323(9) 0.033(4) Uani 1 1 d U . .
C173 C 0.4738(10) 0.3092(10) 0.3000(9) 0.037(4) Uani 1 1 d U . .
H17A H 0.4181 0.3072 0.3433 0.055 Uiso 1 1 calc R . .
H17B H 0.4458 0.3568 0.2551 0.055 Uiso 1 1 calc R . .
H17C H 0.5327 0.3327 0.3086 0.055 Uiso 1 1 calc R . .
C174 C 0.6966(10) 0.0330(9) 0.2994(8) 0.022(3) Uani 1 1 d U . .
H174 H 0.6473 0.0268 0.3477 0.027 Uiso 1 1 calc R . .
C175 C 0.7759(10) 0.0961(10) 0.2965(8) 0.029(4) Uani 1 1 d U . .
H17D H 0.8145 0.0634 0.3394 0.044 Uiso 1 1 calc R . .
H17E H 0.7386 0.1658 0.2984 0.044 Uiso 1 1 calc R . .
H17F H 0.8257 0.1000 0.2500 0.044 Uiso 1 1 calc R . .
Cl1 Cl 0.2036(3) 0.1259(4) 0.8307(2) 0.0679(14) Uani 1 1 d U . .
Cl2 Cl 0.8493(6) 0.8614(5) 0.4339(4) 0.154(3) Uani 1 1 d U . .
C201 C 0.8979(17) 0.6235(17) 0.9416(13) 0.113(7) Uani 1 1 d U . .
H201 H 0.8873 0.5600 0.9329 0.135 Uiso 1 1 calc R . .
Cl11 Cl 0.8043(5) 0.7157(5) 0.9043(5) 0.140(3) Uani 1 1 d U . .
Cl12 Cl 1.0236(6) 0.6348(7) 0.8990(5) 0.156(3) Uani 1 1 d U . .
Cl13 Cl 0.8799(5) 0.5979(5) 1.0400(4) 0.119(2) Uani 1 1 d U . .
C202 C 0.2745(15) 0.9009(16) 0.7897(12) 0.105(6) Uani 1 1 d U . .
H202 H 0.2548 0.9672 0.8038 0.126 Uiso 1 1 calc R . .
Cl21 Cl 0.2623(6) 0.7972(6) 0.8714(5) 0.176(4) Uani 1 1 d U . .
Cl22 Cl 0.1909(10) 0.9030(8) 0.7320(7) 0.256(5) Uani 1 1 d U . .
Cl23 Cl 0.3998(6) 0.8867(5) 0.7453(6) 0.213(5) Uani 1 1 d U . .
O201 O 0.995(2) 0.9035(18) 0.4597(15) 0.099(9) Uani 0.50 1 d PU . .
 
loop_
 _atom_site_aniso_label
 _atom_site_aniso_U_11
 _atom_site_aniso_U_22
 _atom_site_aniso_U_33
 _atom_site_aniso_U_23
 _atom_site_aniso_U_13
 _atom_site_aniso_U_12
Co1 0.0197(11) 0.0156(11) 0.0232(13) -0.0079(9) -0.0028(9) -0.0008(8)
O21 0.045(6) 0.032(6) 0.031(6) -0.004(5) -0.015(5) -0.001(5)
O22 0.036(5) 0.051(7) 0.027(6) 0.008(5) -0.005(5) -0.002(5)
O31 0.043(6) 0.064(8) 0.032(6) -0.022(6) -0.011(5) -0.007(6)
O32 0.048(6) 0.071(8) 0.038(7) -0.002(6) -0.007(5) 0.010(6)
O41 0.046(6) 0.027(5) 0.066(8) -0.017(6) -0.023(6) -0.003(5)
O42 0.065(7) 0.031(6) 0.052(7) -0.015(5) -0.016(6) -0.004(6)
O51 0.051(7) 0.031(6) 0.029(6) -0.011(5) -0.004(5) -0.014(5)
O52 0.097(8) 0.022(5) 0.040(7) -0.006(5) -0.017(6) -0.016(6)
O61 0.065(8) 0.040(7) 0.028(6) -0.009(5) -0.009(6) -0.007(5)
O62 0.036(6) 0.042(6) 0.047(7) -0.026(5) -0.015(5) 0.000(5)
O63 0.035(6) 0.046(7) 0.052(7) -0.034(6) 0.012(5) -0.025(5)
O71 0.040(6) 0.032(6) 0.047(7) -0.018(5) -0.011(5) 0.007(5)
O72 0.036(6) 0.030(6) 0.039(6) -0.015(5) 0.003(5) 0.009(4)
O73 0.048(6) 0.020(5) 0.081(9) -0.001(6) -0.029(6) -0.001(5)
N1 0.013(5) 0.012(5) 0.036(6) -0.008(4) 0.001(5) -0.003(4)
N2 0.014(6) 0.018(5) 0.028(5) -0.007(4) -0.001(4) -0.006(4)
N3 0.024(6) 0.015(6) 0.032(7) -0.013(5) -0.009(4) 0.002(4)
N4 0.016(5) 0.015(6) 0.023(5) -0.008(4) -0.003(4) -0.006(4)
N5 0.013(5) 0.015(5) 0.025(7) -0.004(5) -0.010(4) 0.005(4)
N6 0.025(5) 0.015(6) 0.039(8) -0.013(5) -0.007(5) -0.004(4)
C1 0.028(8) 0.028(7) 0.035(6) -0.021(6) -0.005(7) -0.001(5)
C2 0.028(8) 0.024(7) 0.031(7) -0.017(6) 0.014(7) -0.009(5)
C3 0.026(9) 0.022(8) 0.049(8) -0.023(6) 0.004(8) 0.008(6)
C4 0.022(8) 0.022(7) 0.032(6) -0.008(5) 0.010(7) -0.004(6)
C5 0.031(8) 0.016(5) 0.038(7) -0.006(5) -0.003(7) -0.001(6)
C6 0.018(7) 0.021(6) 0.019(7) 0.003(5) 0.004(6) -0.004(5)
C7 0.037(9) 0.031(8) 0.034(9) -0.008(7) -0.011(7) 0.006(7)
C8 0.053(10) 0.029(8) 0.021(8) -0.001(6) -0.012(7) -0.005(7)
C9 0.030(8) 0.029(7) 0.006(7) -0.001(5) 0.007(5) -0.011(5)
C10 0.026(8) 0.034(7) 0.019(8) -0.009(6) 0.002(5) -0.012(5)
C11 0.025(7) 0.013(7) 0.023(8) -0.007(6) -0.001(5) -0.007(5)
C12 0.043(9) 0.032(9) 0.022(9) -0.020(7) 0.003(6) 0.003(6)
C13 0.029(8) 0.043(10) 0.023(9) -0.017(7) 0.004(6) 0.000(6)
C14 0.022(7) 0.011(7) 0.029(8) -0.009(6) -0.003(6) -0.001(5)
C15 0.019(5) 0.005(6) 0.019(7) -0.002(5) -0.001(5) -0.005(5)
C16 0.019(6) 0.022(8) 0.020(6) -0.005(6) -0.001(5) -0.007(5)
C17 0.037(7) 0.014(8) 0.016(6) 0.006(6) -0.005(6) -0.001(6)
C18 0.030(7) 0.034(9) 0.016(6) -0.016(7) 0.000(5) -0.005(6)
C19 0.026(7) 0.026(8) 0.017(6) -0.010(6) 0.001(5) -0.007(5)
C20 0.026(7) 0.025(7) 0.022(6) -0.014(5) -0.005(5) -0.013(5)
C21 0.021(7) 0.028(6) 0.047(9) -0.008(6) -0.006(6) 0.009(5)
C22 0.047(9) 0.010(6) 0.048(10) -0.007(7) 0.009(7) 0.012(6)
C23 0.081(11) 0.026(9) 0.032(10) -0.015(8) 0.000(8) -0.013(8)
C24 0.081(12) 0.034(9) 0.076(15) -0.019(10) 0.002(10) 0.040(9)
C25 0.037(7) 0.019(8) 0.040(8) -0.006(6) -0.007(6) 0.005(6)
C26 0.039(7) 0.016(8) 0.027(8) -0.007(6) 0.000(5) -0.005(6)
C27 0.048(9) 0.100(16) 0.032(11) -0.014(11) 0.009(8) 0.001(10)
C31 0.037(7) 0.038(7) 0.027(8) -0.019(6) -0.010(7) 0.003(7)
C32 0.051(8) 0.043(7) 0.021(8) -0.012(6) -0.007(6) -0.017(6)
C33 0.107(14) 0.048(9) 0.008(8) 0.000(6) -0.015(8) -0.031(9)
C34 0.086(12) 0.029(9) 0.043(10) -0.023(8) 0.008(8) -0.010(8)
C35 0.052(6) 0.028(7) 0.017(8) -0.016(6) -0.005(5) -0.013(6)
C36 0.046(6) 0.052(11) 0.034(8) -0.024(8) -0.008(6) -0.021(7)
C37 0.035(8) 0.126(18) 0.111(19) -0.045(15) 0.009(10) 0.012(11)
C41 0.026(6) 0.022(8) 0.050(10) -0.010(6) -0.006(5) -0.002(5)
C42 0.020(6) 0.040(8) 0.053(8) -0.033(6) -0.003(7) 0.003(6)
C43 0.037(10) 0.047(9) 0.048(9) -0.017(7) 0.002(8) -0.004(8)
C44 0.037(9) 0.039(8) 0.053(12) -0.028(8) -0.006(8) 0.011(7)
C45 0.016(6) 0.022(6) 0.038(7) -0.005(6) -0.002(6) 0.006(6)
C46 0.024(8) 0.028(7) 0.031(9) -0.013(6) 0.012(6) -0.006(7)
C47 0.109(15) 0.039(10) 0.066(14) -0.023(10) -0.018(11) -0.021(10)
C51 0.020(6) 0.024(6) 0.024(6) -0.010(5) -0.001(5) -0.002(6)
C52 0.024(6) 0.038(8) 0.024(9) -0.011(7) 0.003(5) -0.016(6)
C53 0.025(7) 0.052(11) 0.059(12) -0.026(9) 0.000(7) -0.010(7)
C54 0.076(12) 0.053(11) 0.045(11) -0.030(9) 0.029(8) -0.036(9)
C55 0.027(8) 0.028(6) 0.027(8) -0.005(6) 0.005(7) -0.022(6)
C56 0.057(9) 0.024(6) 0.025(8) -0.004(5) -0.011(7) -0.013(6)
C57 0.121(16) 0.024(7) 0.078(15) -0.021(9) -0.032(13) -0.008(10)
C61 0.016(7) 0.017(7) 0.033(7) -0.004(6) -0.019(5) 0.002(5)
C62 0.024(9) 0.026(8) 0.035(8) -0.008(7) -0.005(6) -0.019(6)
C63 0.042(10) 0.064(12) 0.068(13) -0.051(10) -0.004(9) -0.024(8)
C64 0.027(8) 0.025(8) 0.031(9) -0.012(6) -0.012(6) -0.004(6)
C65 0.029(8) 0.061(11) 0.037(10) -0.018(8) -0.002(7) -0.023(7)
C71 0.019(7) 0.029(6) 0.033(10) -0.011(6) 0.002(6) -0.007(4)
C72 0.021(7) 0.030(7) 0.037(9) -0.015(7) 0.008(6) -0.013(5)
C73 0.038(10) 0.055(12) 0.084(15) -0.034(10) -0.015(9) 0.017(7)
C74 0.025(7) 0.039(7) 0.057(12) -0.006(8) -0.003(7) -0.019(5)
C75 0.041(8) 0.030(9) 0.053(12) -0.008(9) -0.007(8) -0.018(7)
Co2 0.0212(11) 0.0184(11) 0.0230(13) -0.0060(10) -0.0007(9) -0.0074(9)
O121 0.055(7) 0.025(5) 0.038(7) -0.010(5) 0.004(5) -0.014(5)
O122 0.068(7) 0.050(7) 0.025(6) -0.014(5) 0.002(6) -0.038(6)
O131 0.056(7) 0.060(7) 0.029(6) -0.018(6) 0.005(6) -0.033(6)
O132 0.079(8) 0.036(6) 0.040(7) -0.001(5) -0.021(6) -0.032(6)
O141 0.038(6) 0.038(6) 0.052(8) -0.017(5) 0.007(5) -0.006(5)
O142 0.038(5) 0.052(7) 0.076(9) -0.010(6) 0.010(6) -0.022(5)
O151 0.027(5) 0.045(7) 0.031(7) -0.003(5) 0.006(5) -0.008(5)
O152 0.034(5) 0.046(7) 0.022(6) 0.001(5) -0.005(5) -0.010(5)
O161 0.029(5) 0.040(6) 0.053(7) -0.017(5) 0.009(5) -0.015(5)
O162 0.039(6) 0.044(6) 0.050(8) -0.020(6) -0.005(5) -0.014(5)
O163 0.044(6) 0.060(7) 0.036(6) -0.035(6) -0.003(5) -0.014(5)
O171 0.052(7) 0.031(5) 0.029(7) -0.015(5) 0.004(5) -0.012(5)
O172 0.032(6) 0.023(5) 0.060(8) -0.025(5) 0.003(5) -0.013(4)
O173 0.031(6) 0.027(5) 0.079(8) -0.033(6) -0.008(5) -0.005(4)
N101 0.024 0.028 0.009 -0.002 0.004 0.000
N103 0.022 0.050 0.026 -0.010 0.005 0.002
N104 0.032 0.030 0.027 -0.015 0.005 -0.007
N105 0.016(5) 0.018(6) 0.022(6) -0.008(5) 0.003(4) -0.007(4)
N106 0.023(6) 0.017(6) 0.030(7) -0.002(5) -0.003(5) -0.003(4)
C101 0.018(7) 0.021(5) 0.016(7) -0.008(5) -0.008(5) 0.008(5)
C102 0.027(8) 0.030(7) 0.021(8) -0.013(6) -0.003(6) 0.009(6)
C103 0.007(7) 0.025(7) 0.051(10) -0.002(6) -0.004(6) 0.001(6)
C104 0.026(8) 0.018(6) 0.027(8) 0.001(5) -0.003(6) -0.001(6)
C105 0.022(6) 0.009(6) 0.025(7) -0.007(5) -0.006(5) -0.005(5)
C106 0.026(7) 0.021(6) 0.029(9) -0.005(6) -0.011(5) -0.006(5)
C107 0.030(8) 0.021(7) 0.034(10) 0.006(7) -0.008(6) -0.003(5)
C108 0.039(8) 0.025(6) 0.022(9) -0.001(7) 0.002(7) -0.012(6)
C109 0.015(7) 0.025(5) 0.018(8) 0.003(6) 0.001(5) -0.003(5)
C110 0.020(6) 0.026(6) 0.030(9) -0.017(7) -0.002(6) -0.002(5)
C111 0.022(7) 0.024(6) 0.007(8) -0.006(6) 0.003(5) -0.002(5)
C112 0.033(8) 0.028(7) 0.046(11) -0.024(8) 0.011(7) -0.010(6)
C113 0.028(8) 0.035(7) 0.043(11) -0.021(8) 0.005(6) -0.005(6)
C114 0.020(7) 0.026(6) 0.038(10) -0.015(7) -0.004(5) -0.006(5)
C115 0.031(8) 0.025(6) 0.031(9) -0.014(6) -0.009(5) -0.005(5)
C116 0.029(8) 0.025(6) 0.023(8) -0.010(6) -0.012(5) -0.016(6)
C117 0.050(10) 0.029(7) 0.024(9) -0.007(6) -0.004(6) -0.013(7)
C118 0.030(8) 0.026(7) 0.026(8) -0.006(6) 0.000(6) -0.012(7)
C119 0.014(7) 0.030(6) 0.025(8) -0.008(6) 0.000(6) -0.006(6)
C120 0.028(8) 0.028(6) 0.024(6) -0.013(5) 0.008(6) -0.014(6)
C121 0.032(6) 0.010(6) 0.033(7) -0.002(5) -0.008(7) -0.005(5)
C122 0.033(7) 0.030(7) 0.029(9) -0.012(7) -0.013(6) -0.002(5)
C123 0.030(7) 0.019(8) 0.047(11) 0.005(7) -0.015(7) -0.003(6)
C124 0.019(8) 0.031(7) 0.071(13) -0.020(9) -0.015(8) -0.006(6)
C125 0.033(8) 0.022(7) 0.031(6) -0.005(5) -0.014(5) -0.006(6)
C126 0.025(8) 0.027(7) 0.035(7) -0.012(6) 0.000(7) -0.002(7)
C127 0.118(15) 0.066(13) 0.039(11) -0.022(10) 0.002(11) -0.046(12)
C131 0.021(6) 0.031(9) 0.034(9) -0.012(6) -0.002(5) -0.002(4)
C132 0.018(6) 0.031(6) 0.052(9) -0.020(6) -0.010(7) 0.005(6)
C133 0.028(9) 0.040(9) 0.060(9) -0.002(7) -0.020(8) -0.015(8)
C134 0.017(7) 0.033(9) 0.065(10) -0.024(8) -0.009(7) 0.006(6)
C135 0.037(7) 0.039(6) 0.022(8) -0.014(6) 0.009(7) -0.023(7)
C136 0.032(9) 0.023(7) 0.026(7) -0.004(6) -0.019(7) 0.000(6)
C137 0.129(16) 0.061(12) 0.074(15) -0.037(11) -0.001(13) -0.051(12)
C141 0.029(7) 0.024(6) 0.038(8) -0.019(6) 0.008(7) -0.008(6)
C142 0.026(7) 0.031(8) 0.046(8) -0.025(6) 0.006(6) -0.014(6)
C143 0.061(11) 0.048(10) 0.042(8) -0.032(7) 0.011(8) -0.029(8)
C144 0.045(9) 0.038(9) 0.089(14) -0.048(8) 0.025(8) -0.013(6)
C145 0.035(6) 0.027(8) 0.031(8) -0.021(6) 0.003(5) -0.008(5)
C146 0.027(6) 0.025(8) 0.063(12) -0.022(7) -0.004(6) -0.010(6)
C147 0.041(8) 0.087(15) 0.119(19) -0.021(14) 0.031(11) -0.007(9)
C151 0.013(7) 0.036(9) 0.026(6) -0.011(5) 0.006(5) -0.011(5)
C152 0.032(8) 0.030(7) 0.026(9) -0.014(7) 0.002(6) 0.003(5)
C153 0.061(10) 0.038(8) 0.042(11) -0.022(8) 0.011(8) -0.024(7)
C154 0.060(10) 0.051(11) 0.038(11) -0.029(9) 0.021(8) -0.011(8)
C155 0.034(6) 0.023(6) 0.011(7) -0.001(6) 0.013(5) -0.019(5)
C156 0.043(7) 0.031(8) 0.021(9) -0.016(6) -0.013(6) 0.005(6)
C157 0.045(8) 0.032(10) 0.094(16) -0.005(10) -0.030(10) 0.018(8)
C161 0.017(6) 0.007(7) 0.026(6) 0.002(6) -0.008(4) -0.004(5)
C162 0.024(8) 0.051(8) 0.029(8) -0.019(8) 0.007(6) -0.022(7)
C163 0.042(9) 0.056(12) 0.066(14) -0.023(10) 0.027(8) -0.029(8)
C164 0.026(7) 0.034(9) 0.034(8) -0.015(7) -0.009(5) 0.000(6)
C165 0.038(8) 0.058(11) 0.049(12) -0.004(9) -0.022(7) -0.021(8)
C171 0.025(7) 0.025(6) 0.019(8) -0.016(6) 0.012(5) -0.017(5)
C172 0.048(10) 0.020(6) 0.035(10) -0.011(6) -0.005(6) -0.010(6)
C173 0.041(9) 0.021(8) 0.051(12) -0.019(8) -0.014(8) 0.009(7)
C174 0.026(8) 0.020(7) 0.023(8) -0.009(6) -0.001(6) -0.006(5)
C175 0.030(8) 0.037(8) 0.031(10) -0.022(8) -0.005(7) -0.008(7)
Cl1 0.075(3) 0.084(4) 0.038(3) -0.009(3) 0.001(3) -0.023(3)
Cl2 0.219(7) 0.090(5) 0.149(7) 0.049(4) -0.109(6) -0.060(5)
C201 0.128(11) 0.107(18) 0.091(10) 0.008(15) -0.049(12) -0.021(12)
Cl11 0.143(5) 0.131(6) 0.162(7) -0.039(5) -0.075(5) -0.014(4)
Cl12 0.129(5) 0.201(8) 0.139(7) -0.051(6) -0.009(5) -0.039(5)
Cl13 0.122(5) 0.107(5) 0.110(5) -0.026(4) -0.017(4) 0.003(4)
C202 0.101(11) 0.091(15) 0.091(16) -0.010(10) -0.042(8) 0.040(12)
Cl21 0.151(6) 0.122(6) 0.171(8) 0.024(5) 0.004(5) 0.015(5)
Cl22 0.377(11) 0.181(9) 0.293(12) -0.054(8) -0.214(11) -0.079(9)
Cl23 0.166(6) 0.089(5) 0.247(11) 0.035(6) 0.064(6) 0.034(5)
O201 0.13(2) 0.064(18) 0.07(2) 0.022(15) 0.007(17) -0.040(16)
 
_geom_special_details
;
 All esds (except the esd in the dihedral angle between two l.s. planes)
 are estimated using the full covariance matrix.  The cell esds are taken
 into account individually in the estimation of esds in distances, angles
 and torsion angles; correlations between esds in cell parameters are only
 used when they are defined by crystal symmetry.  An approximate (isotropic)
 treatment of cell esds is used for estimating esds involving l.s. planes.
;
 
loop_
 _geom_bond_atom_site_label_1
 _geom_bond_atom_site_label_2
 _geom_bond_distance
 _geom_bond_site_symmetry_2
 _geom_bond_publ_flag
Co1 N2 1.915(11) . ?
Co1 N4 1.942(11) . ?
Co1 N3 1.966(11) . ?
Co1 N1 1.984(10) . ?
Co1 N5 1.992(9) . ?
Co1 N6 1.995(9) . ?
O21 C26 1.200(15) . ?
O22 C26 1.327(15) . ?
O22 C27 1.441(14) . ?
O31 C36 1.202(17) . ?
O32 C36 1.349(17) . ?
O32 C37 1.456(16) . ?
O41 C46 1.167(15) . ?
O42 C46 1.364(17) . ?
O42 C47 1.434(16) . ?
O51 C55 1.192(16) . ?
O52 C55 1.328(16) . ?
O52 C57 1.497(16) . ?
O61 C62 1.171(16) . ?
O62 C62 1.333(16) . ?
O62 C63 1.437(15) . ?
O63 C64 1.421(14) . ?
O71 C72 1.207(16) . ?
O72 C72 1.365(17) . ?
O72 C73 1.468(14) . ?
O73 C74 1.400(14) . ?
N1 C4 1.355(16) . ?
N1 C1 1.381(17) . ?
N2 C6 1.426(15) . ?
N2 C9 1.447(17) . ?
N3 C14 1.366(15) . ?
N3 C11 1.412(16) . ?
N4 C19 1.400(15) . ?
N4 C16 1.402(14) . ?
N5 C61 1.474(14) . ?
N6 C71 1.498(15) . ?
C1 C20 1.342(18) . ?
C1 C2 1.455(17) . ?
C2 C3 1.355(19) . ?
C3 C4 1.410(18) . ?
C4 C5 1.41(2) . ?
C5 C6 1.436(19) . ?
C5 C21 1.483(17) . ?
C6 C7 1.418(19) . ?
C7 C8 1.325(17) . ?
C8 C9 1.421(17) . ?
C9 C10 1.414(17) . ?
C10 C11 1.387(17) . ?
C10 C31 1.511(18) . ?
C11 C12 1.395(16) . ?
C12 C13 1.358(19) . ?
C13 C14 1.434(17) . ?
C14 C15 1.405(17) . ?
C15 C16 1.404(16) . ?
C15 C41 1.468(16) . ?
C16 C17 1.404(17) . ?
C17 C18 1.358(16) . ?
C18 C19 1.397(17) . ?
C19 C20 1.388(16) . ?
C20 C51 1.468(17) . ?
C21 C25 1.547(18) . ?
C21 C22 1.56(2) . ?
C22 C24 1.537(18) . ?
C22 C23 1.55(2) . ?
C22 C25 1.56(2) . ?
C25 C26 1.494(18) . ?
C31 C32 1.523(18) . ?
C31 C35 1.579(18) . ?
C32 C34 1.512(18) . ?
C32 C33 1.522(18) . ?
C32 C35 1.591(19) . ?
C35 C36 1.465(18) . ?
C41 C42 1.485(17) . ?
C41 C45 1.568(19) . ?
C42 C44 1.500(17) . ?
C42 C45 1.547(19) . ?
C42 C43 1.549(19) . ?
C45 C46 1.499(18) . ?
C51 C52 1.521(16) . ?
C51 C56 1.552(17) . ?
C52 C53 1.476(18) . ?
C52 C54 1.491(18) . ?
C52 C56 1.530(18) . ?
C55 C56 1.496(18) . ?
C61 C64 1.524(16) . ?
C61 C62 1.576(19) . ?
C64 C65 1.457(17) . ?
C71 C72 1.501(18) . ?
C71 C74 1.581(17) . ?
C74 C75 1.534(14) . ?
Co2 N101 1.9158(15) . ?
Co2 N102 1.9532(14) . ?
Co2 N103 1.9643(15) . ?
Co2 N104 1.9806(14) . ?
Co2 N105 2.020(10) . ?
Co2 N106 2.033(11) . ?
O121 C126 1.192(14) . ?
O122 C126 1.304(14) . ?
O122 C127 1.447(16) . ?
O131 C136 1.200(14) . ?
O132 C136 1.356(14) . ?
O132 C137 1.452(16) . ?
O141 C146 1.203(15) . ?
O142 C146 1.319(14) . ?
O142 C147 1.494(14) . ?
O151 C156 1.203(14) . ?
O152 C156 1.334(14) . ?
O152 C157 1.456(13) . ?
O161 C162 1.346(14) . ?
O161 C163 1.434(13) . ?
O162 C162 1.215(15) . ?
O163 C164 1.436(13) . ?
O171 C172 1.210(15) . ?
O172 C172 1.353(16) . ?
O172 C173 1.459(14) . ?
O173 C174 1.419(14) . ?
N101 C101 1.394(13) . ?
N101 C104 1.395(13) . ?
N102 C106 1.366(12) . ?
N102 C109 1.414(12) . ?
N103 C114 1.367(13) . ?
N103 C111 1.418(12) . ?
N104 C119 1.364(13) . ?
N104 C116 1.381(12) . ?
N105 C161 1.489(14) . ?
N106 C171 1.493(14) . ?
C101 C120 1.419(17) . ?
C101 C102 1.421(16) . ?
C102 C103 1.393(18) . ?
C103 C104 1.423(17) . ?
C104 C105 1.396(17) . ?
C105 C106 1.391(15) . ?
C105 C121 1.494(15) . ?
C106 C107 1.440(17) . ?
C107 C108 1.367(16) . ?
C108 C109 1.440(16) . ?
C109 C110 1.372(16) . ?
C110 C111 1.417(16) . ?
C110 C131 1.526(16) . ?
C111 C112 1.404(17) . ?
C112 C113 1.344(17) . ?
C113 C114 1.404(16) . ?
C114 C115 1.415(17) . ?
C115 C116 1.395(16) . ?
C115 C141 1.545(17) . ?
C116 C117 1.447(17) . ?
C117 C118 1.362(17) . ?
C118 C119 1.409(16) . ?
C119 C120 1.454(17) . ?
C120 C151 1.489(16) . ?
C121 C122 1.487(16) . ?
C121 C125 1.519(18) . ?
C122 C124 1.503(17) . ?
C122 C123 1.503(17) . ?
C122 C125 1.520(18) . ?
C125 C126 1.506(19) . ?
C131 C132 1.500(17) . ?
C131 C135 1.506(17) . ?
C132 C135 1.510(17) . ?
C132 C134 1.511(18) . ?
C132 C133 1.535(19) . ?
C135 C136 1.503(18) . ?
C141 C142 1.557(19) . ?
C141 C145 1.559(17) . ?
C142 C144 1.526(17) . ?
C142 C143 1.532(19) . ?
C142 C145 1.570(18) . ?
C145 C146 1.527(17) . ?
C151 C152 1.520(19) . ?
C151 C155 1.559(18) . ?
C152 C154 1.493(17) . ?
C152 C155 1.542(17) . ?
C152 C153 1.547(18) . ?
C155 C156 1.502(16) . ?
C161 C164 1.517(17) . ?
C161 C162 1.540(17) . ?
C164 C165 1.525(17) . ?
C171 C174 1.459(17) . ?
C171 C172 1.528(17) . ?
C174 C175 1.516(16) . ?
C201 Cl11 1.64(2) . ?
C201 Cl12 1.71(2) . ?
C201 Cl13 1.77(2) . ?
C202 Cl23 1.69(2) . ?
C202 Cl22 1.71(2) . ?
C202 Cl21 1.77(2) . ?
 
loop_
 _geom_angle_atom_site_label_1
 _geom_angle_atom_site_label_2
 _geom_angle_atom_site_label_3
 _geom_angle
 _geom_angle_site_symmetry_1
 _geom_angle_site_symmetry_3
 _geom_angle_publ_flag
N2 Co1 N4 179.5(5) . . ?
N2 Co1 N3 89.9(4) . . ?
N4 Co1 N3 90.4(4) . . ?
N2 Co1 N1 91.3(4) . . ?
N4 Co1 N1 88.4(5) . . ?
N3 Co1 N1 177.9(5) . . ?
N2 Co1 N5 86.8(4) . . ?
N4 Co1 N5 93.6(4) . . ?
N3 Co1 N5 89.5(4) . . ?
N1 Co1 N5 88.9(4) . . ?
N2 Co1 N6 95.5(4) . . ?
N4 Co1 N6 84.1(4) . . ?
N3 Co1 N6 90.7(4) . . ?
N1 Co1 N6 90.9(4) . . ?
N5 Co1 N6 177.7(5) . . ?
C26 O22 C27 110.3(11) . . ?
C36 O32 C37 118.0(13) . . ?
C46 O42 C47 116.3(12) . . ?
C55 O52 C57 109.8(12) . . ?
C62 O62 C63 112.7(13) . . ?
C72 O72 C73 115.7(11) . . ?
C4 N1 C1 109.7(12) . . ?
C4 N1 Co1 125.0(10) . . ?
C1 N1 Co1 125.3(9) . . ?
C6 N2 C9 102.4(11) . . ?
C6 N2 Co1 127.2(9) . . ?
C9 N2 Co1 130.1(9) . . ?
C14 N3 C11 105.6(11) . . ?
C14 N3 Co1 127.4(10) . . ?
C11 N3 Co1 126.9(9) . . ?
C19 N4 C16 104.5(11) . . ?
C19 N4 Co1 127.8(9) . . ?
C16 N4 Co1 127.4(9) . . ?
C61 N5 Co1 127.2(8) . . ?
C71 N6 Co1 123.0(8) . . ?
C20 C1 N1 126.2(13) . . ?
C20 C1 C2 126.9(14) . . ?
N1 C1 C2 106.5(13) . . ?
C3 C2 C1 106.6(13) . . ?
C2 C3 C4 109.2(13) . . ?
N1 C4 C3 107.8(14) . . ?
N1 C4 C5 126.3(14) . . ?
C3 C4 C5 125.3(13) . . ?
C4 C5 C6 122.1(12) . . ?
C4 C5 C21 122.5(13) . . ?
C6 C5 C21 115.0(14) . . ?
C7 C6 N2 110.2(13) . . ?
C7 C6 C5 127.2(12) . . ?
N2 C6 C5 122.5(13) . . ?
C8 C7 C6 109.1(13) . . ?
C7 C8 C9 108.4(14) . . ?
C10 C9 C8 129.3(13) . . ?
C10 C9 N2 120.5(12) . . ?
C8 C9 N2 109.8(12) . . ?
C11 C10 C9 125.2(12) . . ?
C11 C10 C31 117.3(12) . . ?
C9 C10 C31 116.6(12) . . ?
C10 C11 C12 125.5(13) . . ?
C10 C11 N3 124.2(12) . . ?
C12 C11 N3 109.6(12) . . ?
C13 C12 C11 108.1(13) . . ?
C12 C13 C14 107.1(13) . . ?
N3 C14 C15 125.4(12) . . ?
N3 C14 C13 109.6(13) . . ?
C15 C14 C13 124.4(12) . . ?
C14 C15 C16 122.2(11) . . ?
C14 C15 C41 114.4(12) . . ?
C16 C15 C41 122.7(12) . . ?
N4 C16 C17 109.4(12) . . ?
N4 C16 C15 124.7(12) . . ?
C17 C16 C15 125.5(12) . . ?
C18 C17 C16 108.1(12) . . ?
C17 C18 C19 107.4(12) . . ?
C20 C19 C18 126.8(12) . . ?
C20 C19 N4 122.8(12) . . ?
C18 C19 N4 110.3(11) . . ?
C1 C20 C19 123.5(13) . . ?
C1 C20 C51 117.9(12) . . ?
C19 C20 C51 117.9(12) . . ?
C5 C21 C25 120.7(11) . . ?
C5 C21 C22 123.8(13) . . ?
C25 C21 C22 60.4(9) . . ?
C24 C22 C23 117.3(14) . . ?
C24 C22 C21 111.9(14) . . ?
C23 C22 C21 124.3(11) . . ?
C24 C22 C25 110.5(14) . . ?
C23 C22 C25 120.3(12) . . ?
C21 C22 C25 59.3(9) . . ?
C26 C25 C21 119.7(11) . . ?
C26 C25 C22 119.3(14) . . ?
C21 C25 C22 60.3(9) . . ?
O21 C26 O22 125.8(13) . . ?
O21 C26 C25 125.9(14) . . ?
O22 C26 C25 108.2(12) . . ?
C10 C31 C32 124.9(13) . . ?
C10 C31 C35 127.1(11) . . ?
C32 C31 C35 61.7(9) . . ?
C34 C32 C33 114.2(13) . . ?
C34 C32 C31 114.8(12) . . ?
C33 C32 C31 122.3(12) . . ?
C34 C32 C35 114.7(12) . . ?
C33 C32 C35 119.7(12) . . ?
C31 C32 C35 60.9(9) . . ?
C36 C35 C31 122.9(12) . . ?
C36 C35 C32 122.3(13) . . ?
C31 C35 C32 57.4(8) . . ?
O31 C36 O32 125.3(15) . . ?
O31 C36 C35 125.9(16) . . ?
O32 C36 C35 108.9(14) . . ?
C15 C41 C42 125.8(12) . . ?
C15 C41 C45 126.0(12) . . ?
C42 C41 C45 60.8(8) . . ?
C41 C42 C44 116.3(12) . . ?
C41 C42 C45 62.3(9) . . ?
C44 C42 C45 114.5(12) . . ?
C41 C42 C43 120.5(11) . . ?
C44 C42 C43 112.7(12) . . ?
C45 C42 C43 121.9(12) . . ?
C46 C45 C42 120.1(12) . . ?
C46 C45 C41 120.8(11) . . ?
C42 C45 C41 57.0(9) . . ?
O41 C46 O42 124.4(15) . . ?
O41 C46 C45 128.5(16) . . ?
O42 C46 C45 107.1(12) . . ?
C20 C51 C52 125.4(12) . . ?
C20 C51 C56 119.9(11) . . ?
C52 C51 C56 59.7(8) . . ?
C53 C52 C54 114.4(12) . . ?
C53 C52 C51 120.8(13) . . ?
C54 C52 C51 116.8(12) . . ?
C53 C52 C56 117.8(13) . . ?
C54 C52 C56 115.5(14) . . ?
C51 C52 C56 61.2(8) . . ?
O51 C55 O52 125.7(14) . . ?
O51 C55 C56 125.0(14) . . ?
O52 C55 C56 109.2(13) . . ?
C55 C56 C52 122.5(13) . . ?
C55 C56 C51 122.3(13) . . ?
C52 C56 C51 59.1(8) . . ?
N5 C61 C64 111.4(10) . . ?
N5 C61 C62 111.5(10) . . ?
C64 C61 C62 111.3(10) . . ?
O61 C62 O62 128.1(16) . . ?
O61 C62 C61 121.2(14) . . ?
O62 C62 C61 110.3(14) . . ?
O63 C64 C65 113.8(11) . . ?
O63 C64 C61 103.3(10) . . ?
C65 C64 C61 113.6(12) . . ?
N6 C71 C72 109.5(11) . . ?
N6 C71 C74 107.4(11) . . ?
C72 C71 C74 109.9(10) . . ?
O71 C72 O72 124.5(14) . . ?
O71 C72 C71 125.3(16) . . ?
O72 C72 C71 110.2(13) . . ?
O73 C74 C75 113.5(11) . . ?
O73 C74 C71 104.6(10) . . ?
C75 C74 C71 111.7(11) . . ?
N101 Co2 N102 88.95(6) . . ?
N101 Co2 N103 179.41(9) . . ?
N102 Co2 N103 91.49(6) . . ?
N101 Co2 N104 90.47(6) . . ?
N102 Co2 N104 179.21(10) . . ?
N103 Co2 N104 89.09(6) . . ?
N101 Co2 N105 88.8(3) . . ?
N102 Co2 N105 85.8(3) . . ?
N103 Co2 N105 90.9(3) . . ?
N104 Co2 N105 94.8(3) . . ?
N101 Co2 N106 90.0(3) . . ?
N102 Co2 N106 92.4(3) . . ?
N103 Co2 N106 90.4(3) . . ?
N104 Co2 N106 87.1(3) . . ?
N105 Co2 N106 177.8(4) . . ?
C126 O122 C127 113.8(9) . . ?
C136 O132 C137 115.6(9) . . ?
C146 O142 C147 113.6(9) . . ?
C156 O152 C157 112.4(9) . . ?
C162 O161 C163 114.6(9) . . ?
C172 O172 C173 117.3(11) . . ?
C101 N101 C104 104.2(8) . . ?
C101 N101 Co2 127.4(5) . . ?
C104 N101 Co2 128.3(6) . . ?
C106 N102 C109 107.9(7) . . ?
C106 N102 Co2 125.8(5) . . ?
C109 N102 Co2 125.6(5) . . ?
C114 N103 C111 103.3(7) . . ?
C114 N103 Co2 129.3(5) . . ?
C111 N103 Co2 127.3(5) . . ?
C119 N104 C116 105.2(8) . . ?
C119 N104 Co2 127.1(6) . . ?
C116 N104 Co2 127.3(5) . . ?
C161 N105 Co2 124.9(8) . . ?
C171 N106 Co2 126.9(8) . . ?
N101 C101 C120 124.7(10) . . ?
N101 C101 C102 111.0(11) . . ?
C120 C101 C102 124.0(12) . . ?
C103 C102 C101 107.2(12) . . ?
C102 C103 C104 105.8(12) . . ?
N101 C104 C105 123.2(11) . . ?
N101 C104 C103 111.8(11) . . ?
C105 C104 C103 124.2(12) . . ?
C106 C105 C104 121.5(11) . . ?
C106 C105 C121 120.0(11) . . ?
C104 C105 C121 118.4(11) . . ?
N102 C106 C105 126.3(11) . . ?
N102 C106 C107 109.4(10) . . ?
C105 C106 C107 123.8(12) . . ?
C108 C107 C106 106.8(12) . . ?
C107 C108 C109 108.8(11) . . ?
C110 C109 N102 126.4(11) . . ?
C110 C109 C108 126.8(11) . . ?
N102 C109 C108 106.6(10) . . ?
C109 C110 C111 123.6(11) . . ?
C109 C110 C131 120.7(12) . . ?
C111 C110 C131 113.8(11) . . ?
C112 C111 C110 124.9(11) . . ?
C112 C111 N103 112.2(11) . . ?
C110 C111 N103 122.9(10) . . ?
C113 C112 C111 103.8(12) . . ?
C112 C113 C114 111.0(13) . . ?
N103 C114 C113 109.5(11) . . ?
N103 C114 C115 123.1(11) . . ?
C113 C114 C115 126.6(12) . . ?
C116 C115 C114 123.7(12) . . ?
C116 C115 C141 118.4(12) . . ?
C114 C115 C141 117.0(11) . . ?
N104 C116 C115 125.0(11) . . ?
N104 C116 C117 109.2(11) . . ?
C115 C116 C117 125.3(12) . . ?
C118 C117 C116 107.1(13) . . ?
C117 C118 C119 106.2(12) . . ?
N104 C119 C118 112.3(11) . . ?
N104 C119 C120 123.4(11) . . ?
C118 C119 C120 124.2(12) . . ?
C101 C120 C119 121.2(12) . . ?
C101 C120 C151 123.1(12) . . ?
C119 C120 C151 115.0(11) . . ?
C122 C121 C105 128.7(11) . . ?
C122 C121 C125 60.7(9) . . ?
C105 C121 C125 120.0(12) . . ?
C121 C122 C124 118.1(11) . . ?
C121 C122 C123 121.6(12) . . ?
C124 C122 C123 112.4(10) . . ?
C121 C122 C125 60.7(8) . . ?
C124 C122 C125 117.5(12) . . ?
C123 C122 C125 117.4(12) . . ?
C126 C125 C121 121.0(12) . . ?
C126 C125 C122 122.9(12) . . ?
C121 C125 C122 58.6(9) . . ?
O121 C126 O122 125.6(12) . . ?
O121 C126 C125 122.8(13) . . ?
O122 C126 C125 111.6(11) . . ?
C132 C131 C135 60.3(8) . . ?
C132 C131 C110 123.7(12) . . ?
C135 C131 C110 125.1(12) . . ?
C131 C132 C135 60.1(8) . . ?
C131 C132 C134 117.0(13) . . ?
C135 C132 C134 115.2(13) . . ?
C131 C132 C133 120.8(12) . . ?
C135 C132 C133 120.4(13) . . ?
C134 C132 C133 113.4(11) . . ?
C136 C135 C131 122.0(11) . . ?
C136 C135 C132 124.0(13) . . ?
C131 C135 C132 59.7(8) . . ?
O131 C136 O132 124.0(11) . . ?
O131 C136 C135 126.1(12) . . ?
O132 C136 C135 109.9(11) . . ?
C115 C141 C142 121.9(12) . . ?
C115 C141 C145 126.1(11) . . ?
C142 C141 C145 60.5(8) . . ?
C144 C142 C143 117.0(12) . . ?
C144 C142 C141 112.3(13) . . ?
C143 C142 C141 122.5(12) . . ?
C144 C142 C145 112.7(12) . . ?
C143 C142 C145 119.9(11) . . ?
C141 C142 C145 59.8(8) . . ?
C146 C145 C141 121.3(11) . . ?
C146 C145 C142 120.5(12) . . ?
C141 C145 C142 59.7(8) . . ?
O141 C146 O142 126.0(11) . . ?
O141 C146 C145 125.9(12) . . ?
O142 C146 C145 107.9(11) . . ?
C120 C151 C152 124.6(11) . . ?
C120 C151 C155 118.5(10) . . ?
C152 C151 C155 60.1(9) . . ?
C154 C152 C151 116.4(12) . . ?
C154 C152 C155 115.3(12) . . ?
C151 C152 C155 61.2(9) . . ?
C154 C152 C153 114.4(12) . . ?
C151 C152 C153 122.3(12) . . ?
C155 C152 C153 116.7(11) . . ?
C156 C155 C152 121.9(11) . . ?
C156 C155 C151 120.1(11) . . ?
C152 C155 C151 58.7(8) . . ?
O151 C156 O152 127.3(11) . . ?
O151 C156 C155 124.8(11) . . ?
O152 C156 C155 107.7(11) . . ?
N105 C161 C164 109.9(10) . . ?
N105 C161 C162 108.1(10) . . ?
C164 C161 C162 109.7(10) . . ?
O162 C162 O161 126.0(11) . . ?
O162 C162 C161 122.9(12) . . ?
O161 C162 C161 110.9(11) . . ?
O163 C164 C161 104.6(9) . . ?
O163 C164 C165 110.9(11) . . ?
C161 C164 C165 114.1(12) . . ?
C174 C171 N106 110.8(10) . . ?
C174 C171 C172 110.9(11) . . ?
N106 C171 C172 111.5(10) . . ?
O171 C172 O172 122.9(13) . . ?
O171 C172 C171 124.7(14) . . ?
O172 C172 C171 111.9(12) . . ?
O173 C174 C171 106.7(10) . . ?
O173 C174 C175 110.7(10) . . ?
C171 C174 C175 110.5(11) . . ?
Cl11 C201 Cl12 115.1(14) . . ?
Cl11 C201 Cl13 112.0(14) . . ?
Cl12 C201 Cl13 114.1(14) . . ?
Cl23 C202 Cl22 109.8(15) . . ?
Cl23 C202 Cl21 110.1(10) . . ?
Cl22 C202 Cl21 108.9(14) . . ?
 
loop_
 _geom_hbond_atom_site_label_D
 _geom_hbond_atom_site_label_H
 _geom_hbond_atom_site_label_A
 _geom_hbond_distance_DH
 _geom_hbond_distance_HA
 _geom_hbond_distance_DA
 _geom_hbond_angle_DHA
 _geom_hbond_site_symmetry_A
N5 H1N5 O21  0.92 2.31 3.071(13) 140.5 .
N6 H1N6 O51  0.92 2.52 3.260(15) 137.9 .
N105 H3N5 O121  0.92 2.36 3.106(10) 138.3 .
N106 H3N6 O151  0.92 2.22 3.035(11) 147.0 .
N105 H4N5 O163  0.92 2.27 2.741(10) 111.6 .
C23 H23B O62  0.98 2.40 3.265(18) 147.5 .
C171 H171 O131  1.00 2.44 3.330(12) 147.6 .
O163 H16O Cl1  0.84 2.33 3.124(5) 158.4 1_554
C165 H16D Cl1  0.98 2.74 3.499(16) 134.9 1_554
O73 H73O Cl2  0.84 2.20 3.036(11) 170.3 .
C175 H17D Cl2  0.98 2.81 3.546(15) 132.6 1_545
C61 H61 O41  1.00 2.50 3.347(15) 142.5 .
C202 H202 Cl1  1.00 2.33 3.33(2) 176.6 1_565
C71 H71 O31  1.00 2.62 3.447(18) 139.8 .
C161 H161 O141  1.00 2.57 3.438(12) 145.2 .
 
_diffrn_measured_fraction_theta_max    0.866
_diffrn_reflns_theta_full              28.90
_diffrn_measured_fraction_theta_full   0.866
_refine_diff_density_max    0.801
_refine_diff_density_min   -0.687
_refine_diff_density_rms    0.156
#==END


data_Rtyr
 
_audit_creation_method            SHELXL-97
_chemical_name_systematic
;
 ?
;
_chemical_name_common             ?
_chemical_melting_point           ?
_chemical_formula_moiety          ?
_chemical_formula_sum
 'C72 H82 Cl13 Co N6 O14'
_chemical_formula_weight          1775.22
 
loop_
 _atom_type_symbol
 _atom_type_description
 _atom_type_scat_dispersion_real
 _atom_type_scat_dispersion_imag
 _atom_type_scat_source
 'C'  'C'   0.0033   0.0016
 'International Tables Vol C Tables 4.2.6.8 and 6.1.1.4'
 'H'  'H'   0.0000   0.0000
 'International Tables Vol C Tables 4.2.6.8 and 6.1.1.4'
 'N'  'N'   0.0061   0.0033
 'International Tables Vol C Tables 4.2.6.8 and 6.1.1.4'
 'O'  'O'   0.0106   0.0060
 'International Tables Vol C Tables 4.2.6.8 and 6.1.1.4'
 'Cl'  'Cl'   0.1484   0.1585
 'International Tables Vol C Tables 4.2.6.8 and 6.1.1.4'
 'Co'  'Co'   0.3494   0.9721
 'International Tables Vol C Tables 4.2.6.8 and 6.1.1.4'
 
_symmetry_cell_setting            Orthorhombic
_symmetry_space_group_name_H-M    P2(1)2(1)2(1)
 
loop_
 _symmetry_equiv_pos_as_xyz
 'x, y, z'
 '-x+1/2, -y, z+1/2'
 '-x, y+1/2, -z+1/2'
 'x+1/2, -y+1/2, -z'
 
_cell_length_a                    11.7375(6)
_cell_length_b                    22.5981(13)
_cell_length_c                    31.3184(15)
_cell_angle_alpha                 90.00
_cell_angle_beta                  90.00
_cell_angle_gamma                 90.00
_cell_volume                      8307.1(8)
_cell_formula_units_Z             4
_cell_measurement_temperature     193(2)
_cell_measurement_reflns_used     ?
_cell_measurement_theta_min       ?
_cell_measurement_theta_max       ?
 
_exptl_crystal_description        ?
_exptl_crystal_colour             ?
_exptl_crystal_size_max           0.1
_exptl_crystal_size_mid           0.1
_exptl_crystal_size_min           0.3
_exptl_crystal_density_meas       ?
_exptl_crystal_density_diffrn     1.419
_exptl_crystal_density_method     'not measured'
_exptl_crystal_F_000              3664
_exptl_absorpt_coefficient_mu     0.687
_exptl_absorpt_correction_type    none
_exptl_absorpt_correction_T_min   ?
_exptl_absorpt_correction_T_max   ?
_exptl_absorpt_process_details    ?
 
_exptl_special_details
;
 ?
;
 
_diffrn_ambient_temperature       193(2)
_diffrn_radiation_wavelength      0.71073
_diffrn_radiation_type            MoK\a
_diffrn_radiation_source          'fine-focus sealed tube'
_diffrn_radiation_monochromator   graphite
_diffrn_measurement_device_type   'CCD area detector'
_diffrn_measurement_method        'phi and omega scans'
_diffrn_detector_area_resol_mean  ?
_diffrn_standards_number          ?
_diffrn_standards_interval_count  ?
_diffrn_standards_interval_time   ?
_diffrn_standards_decay_%         ?
_diffrn_reflns_number             33137
_diffrn_reflns_av_R_equivalents   0.0760
_diffrn_reflns_av_sigmaI/netI     0.2312
_diffrn_reflns_limit_h_min        -12
_diffrn_reflns_limit_h_max        15
_diffrn_reflns_limit_k_min        -31
_diffrn_reflns_limit_k_max        18
_diffrn_reflns_limit_l_min        -42
_diffrn_reflns_limit_l_max        21
_diffrn_reflns_theta_min          1.80
_diffrn_reflns_theta_max          29.50
_reflns_number_total              18770
_reflns_number_gt                 7475
_reflns_threshold_expression      >2sigma(I)
 
_computing_data_collection        'Bruker SMART'
_computing_cell_refinement        'Bruker SMART'
_computing_data_reduction         'Bruker SHELXTL'
_computing_structure_solution     'SHELXS-97 (Sheldrick, 1990)'
_computing_structure_refinement   'SHELXL-97 (Sheldrick, 1997)'
_computing_molecular_graphics     'Bruker SHELXTL'
_computing_publication_material   'Bruker SHELXTL'
 
_refine_special_details
;
 Refinement of F^2^ against ALL reflections.  The weighted R-factor wR and
 goodness of fit S are based on F^2^, conventional R-factors R are based
 on F, with F set to zero for negative F^2^. The threshold expression of
 F^2^ > 2sigma(F^2^) is used only for calculating R-factors(gt) etc. and is
 not relevant to the choice of reflections for refinement.  R-factors based
 on F^2^ are statistically about twice as large as those based on F, and R-
 factors based on ALL data will be even larger.
;
 
_refine_ls_structure_factor_coef  Fsqd
_refine_ls_matrix_type            full
_refine_ls_weighting_scheme       calc
_refine_ls_weighting_details
 'calc w=1/[\s^2^(Fo^2^)+(0.0809P)^2^+0.0000P] where P=(Fo^2^+2Fc^2^)/3'
_atom_sites_solution_primary      direct
_atom_sites_solution_secondary    difmap
_atom_sites_solution_hydrogens    geom
_refine_ls_hydrogen_treatment     mixed
_refine_ls_extinction_method      none
_refine_ls_extinction_coef        ?
_refine_ls_abs_structure_details
 'Flack H D (1983), Acta Cryst. A39, 876-881'
_refine_ls_abs_structure_Flack    -0.02(2)
_refine_ls_number_reflns          18770
_refine_ls_number_parameters      955
_refine_ls_number_restraints      0
_refine_ls_R_factor_all           0.1800
_refine_ls_R_factor_gt            0.0644
_refine_ls_wR_factor_ref          0.1774
_refine_ls_wR_factor_gt           0.1420
_refine_ls_goodness_of_fit_ref    0.841
_refine_ls_restrained_S_all       0.841
_refine_ls_shift/su_max           0.089
_refine_ls_shift/su_mean          0.002
 
loop_
 _atom_site_label
 _atom_site_type_symbol
 _atom_site_fract_x
 _atom_site_fract_y
 _atom_site_fract_z
 _atom_site_U_iso_or_equiv
 _atom_site_adp_type
 _atom_site_occupancy
 _atom_site_symmetry_multiplicity
 _atom_site_calc_flag
 _atom_site_refinement_flags
 _atom_site_disorder_assembly
 _atom_site_disorder_group
Co Co 0.69160(6) 0.42838(3) 0.13258(3) 0.02131(19) Uani 1 1 d . . .
O21 O 0.8802(4) 0.3904(2) 0.28154(15) 0.0465(13) Uani 1 1 d . . .
O22 O 0.8962(5) 0.3042(2) 0.31640(18) 0.0714(17) Uani 1 1 d . . .
O41 O 0.5340(4) 0.2345(2) 0.11376(15) 0.0428(12) Uani 1 1 d . . .
O42 O 0.5684(4) 0.1482(2) 0.14704(17) 0.0550(14) Uani 1 1 d . . .
O61 O 0.9815(4) 0.56077(19) 0.09454(16) 0.0455(13) Uani 1 1 d . . .
O62 O 1.0149(4) 0.6462(2) 0.06066(17) 0.0550(14) Uani 1 1 d . . .
O81 O 0.3427(4) 0.5680(2) 0.08283(17) 0.0612(15) Uani 1 1 d . . .
O82 O 0.3384(5) 0.6612(3) 0.06042(18) 0.0704(17) Uani 1 1 d . . .
O91 O 1.0064(4) 0.39224(19) 0.13000(17) 0.0404(12) Uani 1 1 d . . .
O92 O 0.9880(4) 0.34735(17) 0.19412(16) 0.0396(12) Uani 1 1 d . . .
O93 O 0.7241(5) 0.6848(2) 0.26145(16) 0.0698(18) Uani 1 1 d . . .
H1PH H 0.7072 0.6800 0.2873 0.105 Uiso 1 1 calc R . .
O101 O 0.5524(4) 0.3947(2) 0.02395(15) 0.0496(14) Uani 1 1 d . . .
O102 O 0.4344(5) 0.4715(2) 0.02635(15) 0.0594(16) Uani 1 1 d . . .
O103 O 0.2944(4) 0.36947(18) 0.27477(14) 0.0417(12) Uani 1 1 d . . .
H2PH H 0.2599 0.4001 0.2828 0.063 Uiso 1 1 calc R . .
N1 N 0.6080(4) 0.46153(19) 0.18139(16) 0.0248(12) Uani 1 1 d . . .
N2 N 0.7144(4) 0.35463(19) 0.16446(15) 0.0229(12) Uani 1 1 d . . .
N3 N 0.7747(4) 0.39495(19) 0.08449(16) 0.0261(12) Uani 1 1 d . . .
N4 N 0.6708(4) 0.5030(2) 0.10060(16) 0.0274(12) Uani 1 1 d . . .
N5 N 0.8308(4) 0.46722(19) 0.15268(15) 0.0238(12) Uani 1 1 d . . .
H5N1 H 0.8763 0.4726 0.1291 0.029 Uiso 1 1 calc R . .
H5N2 H 0.8098 0.5043 0.1618 0.029 Uiso 1 1 calc R . .
N6 N 0.5527(4) 0.38930(19) 0.11146(15) 0.0222(12) Uani 1 1 d . . .
H6N1 H 0.5773 0.3599 0.0933 0.027 Uiso 1 1 calc R . .
H6N2 H 0.5216 0.3704 0.1347 0.027 Uiso 1 1 calc R . .
C1 C 0.5442(5) 0.5132(2) 0.1823(2) 0.0291(16) Uani 1 1 d . . .
C2 C 0.4943(5) 0.5210(3) 0.2235(2) 0.0286(15) Uani 1 1 d . . .
H2 H 0.4478 0.5532 0.2323 0.034 Uiso 1 1 calc R . .
C3 C 0.5254(5) 0.4745(3) 0.2473(2) 0.0309(16) Uani 1 1 d . . .
H3 H 0.5039 0.4672 0.2761 0.037 Uiso 1 1 calc R . .
C4 C 0.5968(5) 0.4378(3) 0.2216(2) 0.0262(15) Uani 1 1 d . . .
C5 C 0.6447(5) 0.3844(2) 0.23509(19) 0.0211(14) Uani 1 1 d . . .
C6 C 0.6966(5) 0.3446(2) 0.20738(19) 0.0221(13) Uani 1 1 d . . .
C7 C 0.7231(5) 0.2846(2) 0.2167(2) 0.0287(15) Uani 1 1 d . . .
H7 H 0.7230 0.2670 0.2443 0.034 Uiso 1 1 calc R . .
C8 C 0.7482(5) 0.2571(2) 0.1801(2) 0.0339(17) Uani 1 1 d . . .
H8 H 0.7647 0.2162 0.1767 0.041 Uiso 1 1 calc R . .
C9 C 0.7454(5) 0.3005(2) 0.1474(2) 0.0253(15) Uani 1 1 d . . .
C10 C 0.7698(5) 0.2895(2) 0.1039(2) 0.0255(15) Uani 1 1 d . . .
C11 C 0.7920(5) 0.3359(3) 0.0768(2) 0.0312(16) Uani 1 1 d . . .
C12 C 0.8507(6) 0.3301(3) 0.0358(2) 0.0373(18) Uani 1 1 d . . .
H12 H 0.8683 0.2939 0.0218 0.045 Uiso 1 1 calc R . .
C13 C 0.8754(6) 0.3839(3) 0.0212(2) 0.0418(19) Uani 1 1 d . . .
H13 H 0.9186 0.3933 -0.0036 0.050 Uiso 1 1 calc R . .
C14 C 0.8225(5) 0.4259(3) 0.05105(19) 0.0305(14) Uani 1 1 d . . .
C15 C 0.8146(5) 0.4862(3) 0.04528(19) 0.0309(15) Uani 1 1 d . . .
C16 C 0.7374(5) 0.5214(3) 0.0665(2) 0.0288(15) Uani 1 1 d . . .
C17 C 0.7110(5) 0.5807(3) 0.0572(2) 0.0343(16) Uani 1 1 d . . .
H17 H 0.7458 0.6041 0.0356 0.041 Uiso 1 1 calc R . .
C18 C 0.6282(6) 0.5987(3) 0.0839(2) 0.0351(17) Uani 1 1 d . . .
H18 H 0.5915 0.6362 0.0836 0.042 Uiso 1 1 calc R . .
C19 C 0.6056(5) 0.5511(2) 0.1127(2) 0.0257(15) Uani 1 1 d . . .
C20 C 0.5394(5) 0.5550(2) 0.1486(2) 0.0220(14) Uani 1 1 d . . .
C21 C 0.6218(5) 0.3636(3) 0.2802(2) 0.0307(16) Uani 1 1 d . . .
H21 H 0.5526 0.3378 0.2816 0.037 Uiso 1 1 calc R . .
C22 C 0.6399(5) 0.3974(3) 0.3215(2) 0.0309(16) Uani 1 1 d . . .
C23 C 0.6953(6) 0.4583(3) 0.3229(2) 0.0469(19) Uani 1 1 d . . .
H23A H 0.6372 0.4883 0.3291 0.070 Uiso 1 1 calc R . .
H23B H 0.7305 0.4669 0.2952 0.070 Uiso 1 1 calc R . .
H23C H 0.7537 0.4590 0.3452 0.070 Uiso 1 1 calc R . .
C24 C 0.5513(6) 0.3877(3) 0.3560(2) 0.053(2) Uani 1 1 d . . .
H24A H 0.5087 0.4245 0.3606 0.080 Uiso 1 1 calc R . .
H24B H 0.5891 0.3761 0.3826 0.080 Uiso 1 1 calc R . .
H24C H 0.4987 0.3564 0.3471 0.080 Uiso 1 1 calc R . .
C25 C 0.7145(5) 0.3428(3) 0.3115(2) 0.0332(16) Uani 1 1 d . . .
H25 H 0.6957 0.3063 0.3281 0.040 Uiso 1 1 calc R . .
C26 C 0.8362(7) 0.3499(3) 0.3000(2) 0.048(2) Uani 1 1 d . . .
C27 C 1.0185(8) 0.3052(5) 0.3070(4) 0.107(4) Uani 1 1 d . . .
H27A H 1.0553 0.2710 0.3205 0.161 Uiso 1 1 calc R . .
H27B H 1.0520 0.3417 0.3183 0.161 Uiso 1 1 calc R . .
H27C H 1.0301 0.3035 0.2761 0.161 Uiso 1 1 calc R . .
C41 C 0.7889(6) 0.2279(2) 0.0891(2) 0.0342(17) Uani 1 1 d . . .
H41 H 0.8698 0.2145 0.0916 0.041 Uiso 1 1 calc R . .
C42 C 0.7256(6) 0.2006(3) 0.0521(3) 0.0408(19) Uani 1 1 d . . .
C43 C 0.6376(6) 0.2347(3) 0.0275(2) 0.051(2) Uani 1 1 d . . .
H43A H 0.6686 0.2458 -0.0004 0.076 Uiso 1 1 calc R . .
H43B H 0.6170 0.2705 0.0434 0.076 Uiso 1 1 calc R . .
H43C H 0.5697 0.2101 0.0235 0.076 Uiso 1 1 calc R . .
C44 C 0.7983(7) 0.1589(3) 0.0243(3) 0.067(2) Uani 1 1 d . . .
H44A H 0.8097 0.1768 -0.0039 0.101 Uiso 1 1 calc R . .
H44B H 0.7590 0.1209 0.0211 0.101 Uiso 1 1 calc R . .
H44C H 0.8723 0.1525 0.0380 0.101 Uiso 1 1 calc R . .
C45 C 0.7012(6) 0.1787(2) 0.0963(2) 0.0382(18) Uani 1 1 d . . .
H45 H 0.7346 0.1391 0.1031 0.046 Uiso 1 1 calc R . .
C46 C 0.5921(6) 0.1921(3) 0.1188(2) 0.0411(19) Uani 1 1 d . . .
C47 C 0.4720(7) 0.1580(4) 0.1733(3) 0.075(3) Uani 1 1 d . . .
H47A H 0.4630 0.1248 0.1931 0.112 Uiso 1 1 calc R . .
H47B H 0.4038 0.1614 0.1554 0.112 Uiso 1 1 calc R . .
H47C H 0.4826 0.1947 0.1895 0.112 Uiso 1 1 calc R . .
C61 C 0.8866(6) 0.5134(3) 0.0097(2) 0.0376(17) Uani 1 1 d . . .
H61 H 0.8460 0.5157 -0.0183 0.045 Uiso 1 1 calc R . .
C62 C 1.0128(6) 0.5068(3) 0.0054(2) 0.044(2) Uani 1 1 d . . .
C63 C 1.0852(6) 0.4723(3) 0.0369(2) 0.047(2) Uani 1 1 d . . .
H63A H 1.0547 0.4776 0.0658 0.070 Uiso 1 1 calc R . .
H63B H 1.1638 0.4869 0.0359 0.070 Uiso 1 1 calc R . .
H63C H 1.0839 0.4302 0.0294 0.070 Uiso 1 1 calc R . .
C64 C 1.0568(7) 0.5023(3) -0.0405(3) 0.067(2) Uani 1 1 d . . .
H64A H 1.0089 0.5265 -0.0593 0.100 Uiso 1 1 calc R . .
H64B H 1.0541 0.4609 -0.0499 0.100 Uiso 1 1 calc R . .
H64C H 1.1355 0.5166 -0.0418 0.100 Uiso 1 1 calc R . .
C65 C 0.9653(6) 0.5660(3) 0.0181(2) 0.0411(18) Uani 1 1 d . . .
H65 H 0.9663 0.5967 -0.0049 0.049 Uiso 1 1 calc R . .
C66 C 0.9861(6) 0.5889(3) 0.0618(3) 0.046(2) Uani 1 1 d . . .
C67 C 1.0459(8) 0.6726(3) 0.1003(3) 0.078(3) Uani 1 1 d . . .
H67A H 1.0644 0.7144 0.0957 0.117 Uiso 1 1 calc R . .
H67B H 1.1125 0.6521 0.1120 0.117 Uiso 1 1 calc R . .
H67C H 0.9821 0.6694 0.1203 0.117 Uiso 1 1 calc R . .
C81 C 0.4825(5) 0.6139(3) 0.1590(2) 0.0304(16) Uani 1 1 d . . .
H81 H 0.5358 0.6417 0.1738 0.036 Uiso 1 1 calc R . .
C82 C 0.3606(6) 0.6236(3) 0.1723(2) 0.0311(16) Uani 1 1 d . . .
C83 C 0.2743(5) 0.5739(3) 0.1730(2) 0.0422(18) Uani 1 1 d . . .
H83A H 0.2573 0.5632 0.2027 0.063 Uiso 1 1 calc R . .
H83B H 0.3055 0.5394 0.1580 0.063 Uiso 1 1 calc R . .
H83C H 0.2042 0.5868 0.1588 0.063 Uiso 1 1 calc R . .
C84 C 0.3386(6) 0.6705(3) 0.2051(2) 0.0451(19) Uani 1 1 d . . .
H84A H 0.3128 0.6520 0.2317 0.068 Uiso 1 1 calc R . .
H84B H 0.2796 0.6976 0.1946 0.068 Uiso 1 1 calc R . .
H84C H 0.4089 0.6927 0.2104 0.068 Uiso 1 1 calc R . .
C85 C 0.4015(5) 0.6463(3) 0.1291(2) 0.0356(17) Uani 1 1 d . . .
H85 H 0.4134 0.6900 0.1277 0.043 Uiso 1 1 calc R . .
C86 C 0.3586(5) 0.6194(3) 0.0896(2) 0.0386(18) Uani 1 1 d . . .
C87 C 0.2907(9) 0.6398(5) 0.0189(3) 0.103(4) Uani 1 1 d . . .
H87A H 0.2788 0.6736 -0.0002 0.155 Uiso 1 1 calc R . .
H87B H 0.2178 0.6199 0.0240 0.155 Uiso 1 1 calc R . .
H87C H 0.3442 0.6120 0.0057 0.155 Uiso 1 1 calc R . .
C91 C 0.9057(5) 0.4417(2) 0.1870(2) 0.0274(15) Uani 1 1 d . . .
H91 H 0.8579 0.4257 0.2107 0.033 Uiso 1 1 calc R . .
C92 C 0.9722(5) 0.3919(3) 0.1661(3) 0.0316(17) Uani 1 1 d . . .
C93 C 1.0531(6) 0.2970(3) 0.1763(3) 0.059(2) Uani 1 1 d . . .
H93A H 1.0617 0.2663 0.1982 0.089 Uiso 1 1 calc R . .
H93B H 1.1285 0.3107 0.1672 0.089 Uiso 1 1 calc R . .
H93C H 1.0122 0.2807 0.1517 0.089 Uiso 1 1 calc R . .
C94 C 0.9884(5) 0.4892(2) 0.2043(2) 0.0328(17) Uani 1 1 d . . .
H94A H 1.0343 0.4721 0.2277 0.039 Uiso 1 1 calc R . .
H94B H 1.0411 0.5015 0.1812 0.039 Uiso 1 1 calc R . .
C95 C 0.9241(5) 0.5428(3) 0.2206(2) 0.0283(16) Uani 1 1 d . . .
C96 C 0.8959(6) 0.5893(2) 0.1929(2) 0.0350(17) Uani 1 1 d . . .
H96 H 0.9226 0.5886 0.1642 0.042 Uiso 1 1 calc R . .
C97 C 0.8297(6) 0.6360(3) 0.2067(2) 0.0419(19) Uani 1 1 d . . .
H97 H 0.8100 0.6667 0.1874 0.050 Uiso 1 1 calc R . .
C98 C 0.7923(6) 0.6383(3) 0.2479(2) 0.0414(18) Uani 1 1 d . . .
C99 C 0.8221(6) 0.5951(3) 0.2755(2) 0.047(2) Uani 1 1 d . . .
H99 H 0.7965 0.5975 0.3042 0.057 Uiso 1 1 calc R . .
C100 C 0.8882(6) 0.5476(3) 0.2634(2) 0.0383(17) Uani 1 1 d . . .
H100 H 0.9095 0.5185 0.2837 0.046 Uiso 1 1 calc R . .
C101 C 0.4572(5) 0.4180(2) 0.08966(18) 0.0240(14) Uani 1 1 d . . .
H101 H 0.4450 0.4579 0.1026 0.029 Uiso 1 1 calc R . .
C102 C 0.4894(6) 0.4261(3) 0.0422(2) 0.0354(16) Uani 1 1 d . . .
C103 C 0.4608(11) 0.4863(4) -0.0181(2) 0.100(4) Uani 1 1 d . . .
H10A H 0.4125 0.5193 -0.0274 0.150 Uiso 1 1 calc R . .
H10B H 0.4464 0.4518 -0.0363 0.150 Uiso 1 1 calc R . .
H10C H 0.5411 0.4978 -0.0204 0.150 Uiso 1 1 calc R . .
C104 C 0.3465(5) 0.3817(3) 0.0945(2) 0.0307(16) Uani 1 1 d . . .
H10D H 0.2827 0.4025 0.0803 0.037 Uiso 1 1 calc R . .
H10E H 0.3558 0.3425 0.0809 0.037 Uiso 1 1 calc R . .
C105 C 0.3208(5) 0.3743(2) 0.1415(2) 0.0271(15) Uani 1 1 d . . .
C106 C 0.3635(5) 0.3265(3) 0.1646(2) 0.0325(16) Uani 1 1 d . . .
H106 H 0.4005 0.2952 0.1498 0.039 Uiso 1 1 calc R . .
C107 C 0.3531(5) 0.3235(3) 0.2089(2) 0.0333(16) Uani 1 1 d . . .
H107 H 0.3812 0.2900 0.2239 0.040 Uiso 1 1 calc R . .
C108 C 0.3019(6) 0.3692(3) 0.2308(2) 0.0331(16) Uani 1 1 d . . .
C109 C 0.2583(5) 0.4166(3) 0.2085(2) 0.0345(17) Uani 1 1 d . . .
H109 H 0.2214 0.4477 0.2235 0.041 Uiso 1 1 calc R . .
C110 C 0.2680(5) 0.4192(3) 0.1642(2) 0.0294(15) Uani 1 1 d . . .
H110 H 0.2379 0.4523 0.1493 0.035 Uiso 1 1 calc R . .
C201 C 0.8531(12) 0.3440(5) 0.4253(3) 0.116(5) Uani 1 1 d . . .
H201 H 0.8777 0.3324 0.3959 0.139 Uiso 1 1 calc R . .
Cl11 Cl 0.9597(4) 0.3253(2) 0.4602(3) 0.284(4) Uani 1 1 d . . .
Cl12 Cl 0.8335(4) 0.41681(14) 0.42602(12) 0.1537(16) Uani 1 1 d . . .
Cl13 Cl 0.7366(3) 0.30419(17) 0.43791(15) 0.1676(17) Uani 1 1 d . . .
C202 C 0.6847(10) 0.3668(5) -0.0716(3) 0.105(4) Uani 1 1 d . . .
H202 H 0.6641 0.3692 -0.0406 0.126 Uiso 1 1 calc R . .
Cl21 Cl 0.5599(4) 0.3678(3) -0.10343(16) 0.274(4) Uani 1 1 d . . .
Cl22 Cl 0.7638(6) 0.30509(14) -0.08096(12) 0.255(4) Uani 1 1 d . . .
Cl23 Cl 0.7569(3) 0.42728(13) -0.08622(9) 0.1261(12) Uani 1 1 d . . .
C203 C 0.2117(7) 0.4900(4) 0.3288(3) 0.069(3) Uani 1 1 d . . .
H203 H 0.2376 0.4547 0.3122 0.083 Uiso 1 1 calc R . .
Cl31 Cl 0.0834(4) 0.47321(18) 0.35549(16) 0.1809(19) Uani 1 1 d . . .
Cl32 Cl 0.3127(3) 0.50914(11) 0.36432(12) 0.1454(16) Uani 1 1 d . . .
Cl33 Cl 0.1878(3) 0.54949(12) 0.29354(8) 0.1016(9) Uani 1 1 d . . .
C204 C 0.6812(8) 0.7868(3) 0.0869(3) 0.067(2) Uani 1 1 d . . .
H204 H 0.6573 0.7731 0.1159 0.080 Uiso 1 1 calc R . .
Cl41 Cl 0.7315(3) 0.85801(9) 0.09149(8) 0.0962(9) Uani 1 1 d . . .
Cl42 Cl 0.5641(2) 0.78295(15) 0.05355(10) 0.1115(10) Uani 1 1 d . . .
Cl43 Cl 0.7876(2) 0.73883(9) 0.06831(9) 0.0806(8) Uani 1 1 d . . .
Cl1 Cl 0.61875(17) 0.75498(7) 0.18798(6) 0.0475(5) Uani 1 1 d . . .
 
loop_
 _atom_site_aniso_label
 _atom_site_aniso_U_11
 _atom_site_aniso_U_22
 _atom_site_aniso_U_33
 _atom_site_aniso_U_23
 _atom_site_aniso_U_13
 _atom_site_aniso_U_12
Co 0.0238(4) 0.0232(4) 0.0169(4) -0.0016(4) 0.0027(4) -0.0007(4)
O21 0.044(3) 0.065(3) 0.031(3) 0.010(3) -0.004(3) -0.005(3)
O22 0.064(4) 0.081(4) 0.070(4) 0.026(3) -0.002(3) 0.035(3)
O41 0.039(3) 0.046(3) 0.043(3) -0.006(2) 0.010(2) -0.001(2)
O42 0.059(3) 0.040(3) 0.066(4) -0.001(3) 0.018(3) -0.008(3)
O61 0.064(3) 0.045(3) 0.027(3) 0.005(2) 0.009(3) -0.006(2)
O62 0.073(4) 0.040(3) 0.051(4) 0.013(3) 0.008(3) -0.012(3)
O81 0.064(4) 0.065(4) 0.054(4) -0.021(3) -0.016(3) 0.018(3)
O82 0.082(5) 0.091(4) 0.039(4) 0.022(3) -0.013(3) 0.006(3)
O91 0.041(3) 0.051(3) 0.029(3) -0.010(3) 0.002(3) 0.008(2)
O92 0.034(3) 0.026(2) 0.059(4) 0.001(2) 0.002(2) 0.004(2)
O93 0.116(5) 0.063(3) 0.031(3) -0.001(3) 0.026(3) 0.048(3)
O101 0.053(3) 0.080(4) 0.016(3) -0.006(3) 0.009(3) 0.010(3)
O102 0.118(5) 0.044(3) 0.015(3) 0.013(2) 0.000(3) 0.014(3)
O103 0.056(3) 0.047(3) 0.022(3) -0.007(2) 0.009(2) 0.008(2)
N1 0.030(3) 0.026(3) 0.019(3) -0.001(2) 0.000(2) -0.001(2)
N2 0.030(3) 0.023(2) 0.015(3) -0.002(2) 0.000(2) -0.005(2)
N3 0.030(3) 0.026(3) 0.023(3) -0.002(2) 0.009(2) 0.005(2)
N4 0.030(3) 0.031(3) 0.022(3) 0.004(2) 0.006(2) 0.002(2)
N5 0.026(3) 0.025(2) 0.021(3) 0.000(2) 0.005(2) -0.001(2)
N6 0.026(3) 0.025(3) 0.015(3) -0.003(2) 0.009(2) 0.000(2)
C1 0.027(4) 0.026(3) 0.034(5) -0.007(3) 0.005(3) 0.005(3)
C2 0.036(4) 0.033(3) 0.017(4) -0.004(3) 0.006(3) 0.005(3)
C3 0.032(4) 0.044(4) 0.017(4) -0.002(3) 0.003(3) -0.001(3)
C4 0.021(3) 0.032(3) 0.026(4) -0.005(3) 0.000(3) -0.001(3)
C5 0.022(3) 0.027(3) 0.014(4) -0.003(3) 0.003(3) -0.002(3)
C6 0.021(3) 0.025(3) 0.020(4) -0.002(3) -0.005(3) -0.002(3)
C7 0.038(4) 0.033(3) 0.015(4) 0.003(3) 0.006(3) 0.003(3)
C8 0.038(4) 0.017(3) 0.046(5) -0.003(3) 0.006(4) 0.001(3)
C9 0.025(3) 0.020(3) 0.031(4) 0.001(3) 0.000(3) 0.005(3)
C10 0.026(4) 0.025(3) 0.026(4) -0.004(3) 0.005(3) 0.003(3)
C11 0.029(4) 0.040(4) 0.024(4) -0.009(3) 0.011(3) 0.001(3)
C12 0.044(4) 0.037(4) 0.031(5) -0.017(3) 0.014(3) 0.001(3)
C13 0.043(4) 0.050(4) 0.032(5) -0.005(4) 0.021(4) 0.012(4)
C14 0.035(4) 0.040(3) 0.016(4) 0.000(3) 0.009(3) 0.001(3)
C15 0.033(4) 0.041(4) 0.019(4) 0.001(3) -0.001(3) 0.000(3)
C16 0.036(4) 0.032(3) 0.018(4) 0.007(3) 0.004(3) 0.001(3)
C17 0.038(4) 0.032(3) 0.033(4) 0.016(3) 0.011(3) 0.005(3)
C18 0.043(4) 0.029(3) 0.033(5) 0.012(3) 0.014(4) 0.009(3)
C19 0.028(4) 0.025(3) 0.024(4) 0.000(3) 0.000(3) 0.001(3)
C20 0.021(3) 0.023(3) 0.022(4) -0.003(3) 0.003(3) -0.003(2)
C21 0.030(4) 0.034(3) 0.027(4) -0.004(3) -0.004(3) -0.005(3)
C22 0.039(4) 0.038(4) 0.015(4) -0.003(3) -0.001(3) -0.003(3)
C23 0.047(4) 0.040(4) 0.054(5) -0.004(3) -0.014(4) 0.008(4)
C24 0.051(5) 0.074(5) 0.034(5) -0.006(4) -0.008(4) 0.001(4)
C25 0.038(4) 0.041(4) 0.021(4) 0.003(3) 0.002(3) -0.003(3)
C26 0.059(6) 0.056(5) 0.028(5) -0.008(4) -0.013(4) 0.002(4)
C27 0.073(8) 0.131(9) 0.117(10) 0.035(8) 0.006(7) 0.049(7)
C41 0.034(4) 0.027(3) 0.042(5) -0.010(3) 0.017(3) -0.002(3)
C42 0.041(4) 0.035(4) 0.046(5) -0.019(4) 0.012(4) -0.001(3)
C43 0.054(5) 0.060(5) 0.038(5) -0.011(4) 0.003(4) -0.015(4)
C44 0.081(6) 0.055(5) 0.066(6) -0.041(4) 0.016(5) -0.004(5)
C45 0.038(4) 0.022(3) 0.054(5) -0.017(3) -0.002(4) 0.004(3)
C46 0.047(5) 0.028(4) 0.048(5) -0.019(4) 0.001(4) -0.013(3)
C47 0.057(6) 0.090(7) 0.077(7) 0.021(5) 0.013(5) -0.010(5)
C61 0.053(5) 0.045(4) 0.014(4) 0.004(3) 0.015(3) 0.005(4)
C62 0.046(5) 0.045(4) 0.040(5) 0.010(4) 0.030(4) 0.009(3)
C63 0.044(5) 0.054(4) 0.042(5) 0.001(4) 0.018(4) 0.002(4)
C64 0.072(6) 0.078(6) 0.050(6) 0.010(5) 0.031(5) -0.007(5)
C65 0.050(4) 0.041(4) 0.033(5) 0.013(4) 0.008(4) -0.006(4)
C66 0.038(4) 0.047(5) 0.053(6) 0.013(4) 0.021(4) 0.010(3)
C67 0.091(7) 0.048(5) 0.094(8) -0.008(5) -0.017(6) -0.034(5)
C81 0.037(4) 0.031(3) 0.023(4) -0.011(3) 0.004(3) 0.002(3)
C82 0.040(4) 0.032(4) 0.021(4) -0.004(3) 0.002(3) 0.008(3)
C83 0.043(4) 0.046(4) 0.037(5) 0.014(4) 0.004(3) -0.001(4)
C84 0.044(5) 0.045(4) 0.046(5) -0.011(4) 0.004(4) 0.014(3)
C85 0.045(4) 0.025(3) 0.036(5) 0.008(3) 0.006(4) 0.012(3)
C86 0.027(4) 0.056(5) 0.033(5) 0.004(4) 0.001(3) 0.018(3)
C87 0.095(8) 0.178(11) 0.037(6) 0.018(7) -0.004(6) 0.015(8)
C91 0.019(3) 0.029(3) 0.034(4) -0.004(3) -0.003(3) -0.001(3)
C92 0.022(4) 0.020(3) 0.053(5) -0.002(3) -0.011(4) -0.001(3)
C93 0.044(5) 0.034(4) 0.100(8) 0.002(4) 0.006(5) 0.017(3)
C94 0.021(3) 0.034(3) 0.043(5) -0.004(3) 0.000(3) -0.006(3)
C95 0.023(4) 0.025(3) 0.036(5) -0.007(3) -0.004(3) -0.004(3)
C96 0.047(4) 0.031(3) 0.027(4) -0.005(3) 0.003(4) -0.002(3)
C97 0.055(5) 0.030(3) 0.041(5) 0.003(3) 0.007(4) 0.004(3)
C98 0.061(5) 0.044(4) 0.019(4) 0.006(3) 0.014(4) 0.015(4)
C99 0.062(5) 0.044(4) 0.035(5) 0.000(3) 0.010(4) 0.010(4)
C100 0.053(5) 0.042(4) 0.020(4) 0.002(3) -0.009(4) 0.002(4)
C101 0.033(4) 0.031(3) 0.009(3) -0.001(3) 0.002(3) -0.003(3)
C102 0.047(4) 0.044(4) 0.016(4) -0.002(4) -0.001(3) -0.014(4)
C103 0.227(13) 0.059(5) 0.015(5) 0.012(4) -0.002(6) 0.010(7)
C104 0.024(4) 0.040(4) 0.027(4) -0.008(3) -0.007(3) -0.002(3)
C105 0.020(3) 0.031(3) 0.031(4) 0.002(3) 0.002(3) -0.005(3)
C106 0.030(4) 0.030(3) 0.038(5) 0.002(3) 0.007(3) -0.005(3)
C107 0.033(4) 0.030(3) 0.037(5) 0.003(3) 0.008(3) 0.001(3)
C108 0.031(4) 0.037(3) 0.032(5) 0.001(3) 0.008(3) 0.009(3)
C109 0.036(4) 0.028(3) 0.040(5) -0.002(3) 0.014(3) 0.005(3)
C110 0.025(3) 0.034(3) 0.029(4) 0.006(3) -0.003(3) 0.004(3)
C201 0.209(15) 0.092(8) 0.046(7) -0.013(6) -0.030(8) 0.034(9)
Cl11 0.138(4) 0.164(4) 0.550(11) -0.088(5) -0.169(6) 0.061(3)
Cl12 0.206(4) 0.102(2) 0.153(3) 0.031(2) -0.093(3) -0.036(2)
Cl13 0.135(3) 0.164(3) 0.204(4) 0.058(3) -0.016(3) -0.065(3)
C202 0.119(9) 0.128(9) 0.069(8) -0.015(7) 0.030(7) -0.025(8)
Cl21 0.148(4) 0.527(10) 0.147(4) -0.152(6) 0.070(3) -0.130(5)
Cl22 0.567(11) 0.101(2) 0.096(3) 0.019(2) 0.154(5) 0.102(4)
Cl23 0.189(3) 0.112(2) 0.077(2) 0.0117(18) 0.000(2) -0.043(2)
C203 0.078(7) 0.079(6) 0.051(6) 0.004(5) -0.009(5) -0.009(5)
Cl31 0.146(3) 0.175(4) 0.222(5) 0.088(3) 0.043(3) 0.013(3)
Cl32 0.201(3) 0.0764(16) 0.158(3) -0.0281(19) -0.131(3) 0.029(2)
Cl33 0.133(2) 0.1116(19) 0.0599(17) 0.0112(14) -0.0225(17) 0.0168(18)
C204 0.087(7) 0.070(5) 0.042(5) 0.021(4) 0.022(5) 0.007(5)
Cl41 0.149(3) 0.0606(13) 0.0793(19) -0.0125(13) 0.0467(18) -0.0056(15)
Cl42 0.0795(19) 0.161(3) 0.094(2) -0.003(2) -0.0032(17) 0.0164(18)
Cl43 0.0840(18) 0.0571(12) 0.101(2) 0.0026(13) 0.0100(15) 0.0093(12)
Cl1 0.0718(13) 0.0384(9) 0.0323(11) -0.0031(8) -0.0005(10) -0.0004(9)
 
_geom_special_details
;
 All esds (except the esd in the dihedral angle between two l.s. planes)
 are estimated using the full covariance matrix.  The cell esds are taken
 into account individually in the estimation of esds in distances, angles
 and torsion angles; correlations between esds in cell parameters are only
 used when they are defined by crystal symmetry.  An approximate (isotropic)
 treatment of cell esds is used for estimating esds involving l.s. planes.
;
 
loop_
 _geom_bond_atom_site_label_1
 _geom_bond_atom_site_label_2
 _geom_bond_distance
 _geom_bond_site_symmetry_2
 _geom_bond_publ_flag
Co N3 1.947(5) . ?
Co N5 1.958(5) . ?
Co N2 1.961(5) . ?
Co N1 1.965(5) . ?
Co N6 1.968(5) . ?
Co N4 1.976(5) . ?
O21 C26 1.199(8) . ?
O22 C26 1.350(8) . ?
O22 C27 1.466(10) . ?
O41 C46 1.185(7) . ?
O42 C46 1.358(8) . ?
O42 C47 1.416(9) . ?
O61 C66 1.207(8) . ?
O62 C66 1.339(8) . ?
O62 C67 1.424(9) . ?
O81 C86 1.196(8) . ?
O82 C86 1.334(8) . ?
O82 C87 1.496(10) . ?
O91 C92 1.201(8) . ?
O92 C92 1.348(8) . ?
O92 C93 1.480(7) . ?
O93 C98 1.388(7) . ?
O101 C102 1.174(7) . ?
O102 C102 1.311(8) . ?
O102 C103 1.465(9) . ?
O103 C108 1.379(7) . ?
N1 C4 1.375(7) . ?
N1 C1 1.387(7) . ?
N2 C6 1.379(7) . ?
N2 C9 1.384(7) . ?
N3 C11 1.372(7) . ?
N3 C14 1.379(7) . ?
N4 C19 1.382(7) . ?
N4 C16 1.387(7) . ?
N5 C91 1.503(7) . ?
N6 C101 1.464(7) . ?
C1 C20 1.418(8) . ?
C1 C2 1.429(8) . ?
C2 C3 1.341(8) . ?
C3 C4 1.428(8) . ?
C4 C5 1.396(8) . ?
C5 C6 1.391(8) . ?
C5 C21 1.512(8) . ?
C6 C7 1.421(7) . ?
C7 C8 1.337(8) . ?
C8 C9 1.419(8) . ?
C9 C10 1.413(8) . ?
C10 C11 1.373(8) . ?
C10 C41 1.484(7) . ?
C11 C12 1.465(8) . ?
C12 C13 1.330(9) . ?
C13 C14 1.470(8) . ?
C14 C15 1.377(8) . ?
C15 C16 1.377(8) . ?
C15 C61 1.528(8) . ?
C16 C17 1.405(8) . ?
C17 C18 1.345(8) . ?
C18 C19 1.429(8) . ?
C19 C20 1.369(8) . ?
C20 C81 1.525(8) . ?
C21 C22 1.518(8) . ?
C21 C25 1.539(9) . ?
C22 C24 1.515(9) . ?
C22 C23 1.524(8) . ?
C22 C25 1.545(9) . ?
C25 C26 1.482(10) . ?
C41 C42 1.508(9) . ?
C41 C45 1.533(8) . ?
C42 C45 1.498(10) . ?
C42 C43 1.501(10) . ?
C42 C44 1.540(9) . ?
C45 C46 1.493(10) . ?
C61 C62 1.495(9) . ?
C61 C65 1.528(9) . ?
C62 C65 1.504(9) . ?
C62 C63 1.518(9) . ?
C62 C64 1.532(10) . ?
C65 C66 1.484(10) . ?
C81 C82 1.506(9) . ?
C81 C85 1.521(9) . ?
C82 C84 1.497(8) . ?
C82 C83 1.514(9) . ?
C82 C85 1.524(9) . ?
C85 C86 1.469(10) . ?
C91 C92 1.516(8) . ?
C91 C94 1.545(7) . ?
C94 C95 1.516(8) . ?
C95 C96 1.404(8) . ?
C95 C100 1.410(9) . ?
C96 C97 1.380(8) . ?
C97 C98 1.364(9) . ?
C98 C99 1.349(9) . ?
C99 C100 1.377(9) . ?
C101 C104 1.543(8) . ?
C101 C102 1.544(9) . ?
C104 C105 1.511(9) . ?
C105 C110 1.385(8) . ?
C105 C106 1.393(8) . ?
C106 C107 1.394(9) . ?
C107 C108 1.379(8) . ?
C108 C109 1.375(8) . ?
C109 C110 1.396(8) . ?
C201 Cl12 1.663(10) . ?
C201 Cl13 1.683(14) . ?
C201 Cl11 1.714(12) . ?
C202 Cl23 1.673(10) . ?
C202 Cl22 1.700(11) . ?
C202 Cl21 1.773(12) . ?
C203 Cl32 1.683(8) . ?
C203 Cl33 1.761(8) . ?
C203 Cl31 1.764(9) . ?
C204 Cl41 1.719(8) . ?
C204 Cl42 1.728(9) . ?
C204 Cl43 1.753(8) . ?
 
loop_
 _geom_angle_atom_site_label_1
 _geom_angle_atom_site_label_2
 _geom_angle_atom_site_label_3
 _geom_angle
 _geom_angle_site_symmetry_1
 _geom_angle_site_symmetry_3
 _geom_angle_publ_flag
N3 Co N5 90.3(2) . . ?
N3 Co N2 89.75(19) . . ?
N5 Co N2 95.93(19) . . ?
N3 Co N1 179.5(2) . . ?
N5 Co N1 89.7(2) . . ?
N2 Co N1 89.78(19) . . ?
N3 Co N6 88.9(2) . . ?
N5 Co N6 179.1(2) . . ?
N2 Co N6 84.43(19) . . ?
N1 Co N6 91.08(19) . . ?
N3 Co N4 90.0(2) . . ?
N5 Co N4 83.30(19) . . ?
N2 Co N4 179.2(2) . . ?
N1 Co N4 90.42(19) . . ?
N6 Co N4 96.3(2) . . ?
C26 O22 C27 115.0(7) . . ?
C46 O42 C47 115.2(6) . . ?
C66 O62 C67 116.5(6) . . ?
C86 O82 C87 115.6(7) . . ?
C92 O92 C93 113.6(6) . . ?
C102 O102 C103 115.8(6) . . ?
C4 N1 C1 105.0(5) . . ?
C4 N1 Co 127.7(4) . . ?
C1 N1 Co 127.3(4) . . ?
C6 N2 C9 105.7(4) . . ?
C6 N2 Co 128.0(4) . . ?
C9 N2 Co 126.2(4) . . ?
C11 N3 C14 107.5(5) . . ?
C11 N3 Co 126.0(4) . . ?
C14 N3 Co 126.5(4) . . ?
C19 N4 C16 106.7(5) . . ?
C19 N4 Co 126.9(4) . . ?
C16 N4 Co 125.2(4) . . ?
C91 N5 Co 123.1(3) . . ?
C101 N6 Co 126.3(3) . . ?
N1 C1 C20 124.6(6) . . ?
N1 C1 C2 110.1(6) . . ?
C20 C1 C2 125.0(5) . . ?
C3 C2 C1 107.1(5) . . ?
C2 C3 C4 107.5(6) . . ?
N1 C4 C5 125.2(5) . . ?
N1 C4 C3 110.3(5) . . ?
C5 C4 C3 124.5(6) . . ?
C6 C5 C4 123.1(6) . . ?
C6 C5 C21 117.3(5) . . ?
C4 C5 C21 118.7(5) . . ?
N2 C6 C5 124.6(5) . . ?
N2 C6 C7 108.9(5) . . ?
C5 C6 C7 125.8(6) . . ?
C8 C7 C6 108.4(6) . . ?
C7 C8 C9 107.0(5) . . ?
N2 C9 C10 125.5(5) . . ?
N2 C9 C8 109.8(5) . . ?
C10 C9 C8 124.7(5) . . ?
C11 C10 C9 120.0(5) . . ?
C11 C10 C41 119.5(5) . . ?
C9 C10 C41 119.8(5) . . ?
N3 C11 C10 127.3(6) . . ?
N3 C11 C12 108.0(5) . . ?
C10 C11 C12 124.4(6) . . ?
C13 C12 C11 108.9(6) . . ?
C12 C13 C14 106.2(6) . . ?
C15 C14 N3 125.0(5) . . ?
C15 C14 C13 125.7(6) . . ?
N3 C14 C13 109.2(5) . . ?
C16 C15 C14 123.6(6) . . ?
C16 C15 C61 118.9(5) . . ?
C14 C15 C61 117.2(5) . . ?
C15 C16 N4 124.7(5) . . ?
C15 C16 C17 126.6(6) . . ?
N4 C16 C17 108.7(5) . . ?
C18 C17 C16 108.6(6) . . ?
C17 C18 C19 107.3(5) . . ?
C20 C19 N4 126.2(5) . . ?
C20 C19 C18 125.1(5) . . ?
N4 C19 C18 108.5(5) . . ?
C19 C20 C1 123.0(5) . . ?
C19 C20 C81 118.8(5) . . ?
C1 C20 C81 116.1(5) . . ?
C5 C21 C22 127.9(5) . . ?
C5 C21 C25 124.4(5) . . ?
C22 C21 C25 60.7(4) . . ?
C24 C22 C21 116.1(5) . . ?
C24 C22 C23 113.7(6) . . ?
C21 C22 C23 122.6(6) . . ?
C24 C22 C25 114.8(5) . . ?
C21 C22 C25 60.3(4) . . ?
C23 C22 C25 119.1(5) . . ?
C26 C25 C21 119.6(6) . . ?
C26 C25 C22 120.6(6) . . ?
C21 C25 C22 59.0(4) . . ?
O21 C26 O22 122.9(7) . . ?
O21 C26 C25 128.0(7) . . ?
O22 C26 C25 109.1(7) . . ?
C10 C41 C42 123.4(6) . . ?
C10 C41 C45 122.2(5) . . ?
C42 C41 C45 59.0(4) . . ?
C45 C42 C43 120.8(6) . . ?
C45 C42 C41 61.3(4) . . ?
C43 C42 C41 121.5(5) . . ?
C45 C42 C44 115.2(6) . . ?
C43 C42 C44 113.9(7) . . ?
C41 C42 C44 114.3(6) . . ?
C46 C45 C42 122.1(6) . . ?
C46 C45 C41 119.9(5) . . ?
C42 C45 C41 59.7(4) . . ?
O41 C46 O42 124.0(7) . . ?
O41 C46 C45 126.5(7) . . ?
O42 C46 C45 109.5(6) . . ?
C62 C61 C15 125.0(6) . . ?
C62 C61 C65 59.6(4) . . ?
C15 C61 C65 121.5(6) . . ?
C61 C62 C65 61.3(4) . . ?
C61 C62 C63 123.2(6) . . ?
C65 C62 C63 119.5(6) . . ?
C61 C62 C64 115.2(7) . . ?
C65 C62 C64 115.6(6) . . ?
C63 C62 C64 112.9(6) . . ?
C66 C65 C62 119.5(6) . . ?
C66 C65 C61 121.9(6) . . ?
C62 C65 C61 59.1(4) . . ?
O61 C66 O62 122.9(8) . . ?
O61 C66 C65 126.4(7) . . ?
O62 C66 C65 110.6(7) . . ?
C82 C81 C85 60.4(4) . . ?
C82 C81 C20 127.1(5) . . ?
C85 C81 C20 124.1(5) . . ?
C84 C82 C81 117.2(6) . . ?
C84 C82 C83 113.6(6) . . ?
C81 C82 C83 122.1(5) . . ?
C84 C82 C85 115.2(5) . . ?
C81 C82 C85 60.3(4) . . ?
C83 C82 C85 118.2(5) . . ?
C86 C85 C81 122.4(5) . . ?
C86 C85 C82 120.2(6) . . ?
C81 C85 C82 59.3(4) . . ?
O81 C86 O82 122.7(7) . . ?
O81 C86 C85 127.1(7) . . ?
O82 C86 C85 110.2(7) . . ?
N5 C91 C92 106.2(5) . . ?
N5 C91 C94 110.6(5) . . ?
C92 C91 C94 110.0(5) . . ?
O91 C92 O92 124.8(6) . . ?
O91 C92 C91 125.0(6) . . ?
O92 C92 C91 110.2(6) . . ?
C95 C94 C91 111.2(5) . . ?
C96 C95 C100 117.4(6) . . ?
C96 C95 C94 120.5(6) . . ?
C100 C95 C94 122.1(6) . . ?
C97 C96 C95 120.7(6) . . ?
C98 C97 C96 120.5(6) . . ?
C99 C98 C97 119.6(6) . . ?
C99 C98 O93 120.1(6) . . ?
C97 C98 O93 120.2(6) . . ?
C98 C99 C100 122.3(7) . . ?
C99 C100 C95 119.3(6) . . ?
N6 C101 C104 111.3(4) . . ?
N6 C101 C102 108.3(5) . . ?
C104 C101 C102 111.4(5) . . ?
O101 C102 O102 126.9(7) . . ?
O101 C102 C101 123.5(7) . . ?
O102 C102 C101 109.7(6) . . ?
C105 C104 C101 108.9(5) . . ?
C110 C105 C106 117.5(6) . . ?
C110 C105 C104 120.4(5) . . ?
C106 C105 C104 121.4(6) . . ?
C105 C106 C107 121.5(6) . . ?
C108 C107 C106 119.9(6) . . ?
C109 C108 O103 118.7(5) . . ?
C109 C108 C107 119.4(6) . . ?
O103 C108 C107 121.9(6) . . ?
C108 C109 C110 120.5(6) . . ?
C105 C110 C109 121.1(6) . . ?
Cl12 C201 Cl13 114.4(8) . . ?
Cl12 C201 Cl11 109.6(7) . . ?
Cl13 C201 Cl11 108.1(6) . . ?
Cl23 C202 Cl22 110.2(6) . . ?
Cl23 C202 Cl21 104.7(7) . . ?
Cl22 C202 Cl21 111.4(6) . . ?
Cl32 C203 Cl33 109.3(5) . . ?
Cl32 C203 Cl31 110.1(5) . . ?
Cl33 C203 Cl31 109.0(5) . . ?
Cl41 C204 Cl42 111.8(5) . . ?
Cl41 C204 Cl43 111.2(5) . . ?
Cl42 C204 Cl43 109.6(5) . . ?
 
loop_
 _geom_hbond_atom_site_label_D
 _geom_hbond_atom_site_label_H
 _geom_hbond_atom_site_label_A
 _geom_hbond_distance_DH
 _geom_hbond_distance_HA
 _geom_hbond_distance_DA
 _geom_hbond_angle_DHA
 _geom_hbond_site_symmetry_A
N5 H5N1 O61  0.92 2.58 3.304(6) 135.8 .
N5 H5N1 O91  0.92 2.37 2.762(6) 105.2 .
C91 H91 O21  1.00 2.37 3.195(8) 139.1 .
C96 H96 O61  0.95 2.37 3.302(8) 165.4 .
C106 H106 O41  0.95 2.37 3.297(8) 164.9 .
C201 H201 O22  1.00 2.58 3.562(12) 167.9 .
C202 H202 O101  1.00 2.48 3.429(11) 158.7 .
C203 H203 O103  1.00 2.35 3.350(10) 178.0 .
C204 H204 Cl1  1.00 2.34 3.329(8) 170.3 .
N6 H6N1 O101  0.92 2.33 2.744(7) 107.1 .
 
_diffrn_measured_fraction_theta_max    0.886
_diffrn_reflns_theta_full              29.50
_diffrn_measured_fraction_theta_full   0.886
_refine_diff_density_max    0.825
_refine_diff_density_min   -0.724
_refine_diff_density_rms    0.106
#==END


data_Sglu
 
_audit_creation_method            SHELXL-97
_chemical_name_systematic
;
 ?
;
_chemical_name_common             ?
_chemical_melting_point           ?
_chemical_formula_moiety          ?
_chemical_formula_sum
 'C66 H82 Cl13 Co N6 O16'
_chemical_formula_weight          1735.16
 
loop_
 _atom_type_symbol
 _atom_type_description
 _atom_type_scat_dispersion_real
 _atom_type_scat_dispersion_imag
 _atom_type_scat_source
 'C'  'C'   0.0033   0.0016
 'International Tables Vol C Tables 4.2.6.8 and 6.1.1.4'
 'H'  'H'   0.0000   0.0000
 'International Tables Vol C Tables 4.2.6.8 and 6.1.1.4'
 'N'  'N'   0.0061   0.0033
 'International Tables Vol C Tables 4.2.6.8 and 6.1.1.4'
 'O'  'O'   0.0106   0.0060
 'International Tables Vol C Tables 4.2.6.8 and 6.1.1.4'
 'Cl'  'Cl'   0.1484   0.1585
 'International Tables Vol C Tables 4.2.6.8 and 6.1.1.4'
 'Co'  'Co'   0.3494   0.9721
 'International Tables Vol C Tables 4.2.6.8 and 6.1.1.4'
 
_symmetry_cell_setting            Orthorhombic
_symmetry_space_group_name_H-M    P2(1)2(1)2(1)
 
loop_
 _symmetry_equiv_pos_as_xyz
 'x, y, z'
 '-x+1/2, -y, z+1/2'
 '-x, y+1/2, -z+1/2'
 'x+1/2, -y+1/2, -z'
 
_cell_length_a                    17.0919(7)
_cell_length_b                    19.9345(8)
_cell_length_c                    23.5472(8)
_cell_angle_alpha                 90.00
_cell_angle_beta                  90.00
_cell_angle_gamma                 90.00
_cell_volume                      8023.0(5)
_cell_formula_units_Z             4
_cell_measurement_temperature     193(2)
_cell_measurement_reflns_used     ?
_cell_measurement_theta_min       ?
_cell_measurement_theta_max       ?
 
_exptl_crystal_description        ?
_exptl_crystal_colour             ?
_exptl_crystal_size_max           0.2
_exptl_crystal_size_mid           0.3
_exptl_crystal_size_min           0.5
_exptl_crystal_density_meas       ?
_exptl_crystal_density_diffrn     1.437
_exptl_crystal_density_method     'not measured'
_exptl_crystal_F_000              3584
_exptl_absorpt_coefficient_mu     0.712
_exptl_absorpt_correction_type    none
_exptl_absorpt_correction_T_min   ?
_exptl_absorpt_correction_T_max   ?
_exptl_absorpt_process_details    ?
 
_exptl_special_details
;
 ?
;
 
_diffrn_ambient_temperature       193(2)
_diffrn_radiation_wavelength      0.71073
_diffrn_radiation_type            MoK\a
_diffrn_radiation_source          'fine-focus sealed tube'
_diffrn_radiation_monochromator   graphite
_diffrn_measurement_device_type   'CCD area detector'
_diffrn_measurement_method        'phi and omega scans'
_diffrn_detector_area_resol_mean  ?
_diffrn_standards_number          ?
_diffrn_standards_interval_count  ?
_diffrn_standards_interval_time   ?
_diffrn_standards_decay_%         ?
_diffrn_reflns_number             33152
_diffrn_reflns_av_R_equivalents   0.0465
_diffrn_reflns_av_sigmaI/netI     0.1233
_diffrn_reflns_limit_h_min        -9
_diffrn_reflns_limit_h_max        22
_diffrn_reflns_limit_k_min        -26
_diffrn_reflns_limit_k_max        17
_diffrn_reflns_limit_l_min        -20
_diffrn_reflns_limit_l_max        30
_diffrn_reflns_theta_min          1.57
_diffrn_reflns_theta_max          29.65
_reflns_number_total              18983
_reflns_number_gt                 10127
_reflns_threshold_expression      >2sigma(I)
 
_computing_data_collection        'Bruker SMART'
_computing_cell_refinement        'Bruker SMART'
_computing_data_reduction         'Bruker SHELXTL'
_computing_structure_solution     'SHELXS-97 (Sheldrick, 1990)'
_computing_structure_refinement   'SHELXL-97 (Sheldrick, 1997)'
_computing_molecular_graphics     'Bruker SHELXTL'
_computing_publication_material   'Bruker SHELXTL'
 
_refine_special_details
;
 Refinement of F^2^ against ALL reflections.  The weighted R-factor wR and
 goodness of fit S are based on F^2^, conventional R-factors R are based
 on F, with F set to zero for negative F^2^. The threshold expression of
 F^2^ > 2sigma(F^2^) is used only for calculating R-factors(gt) etc. and is
 not relevant to the choice of reflections for refinement.  R-factors based
 on F^2^ are statistically about twice as large as those based on F, and R-
 factors based on ALL data will be even larger.
;
 
_refine_ls_structure_factor_coef  Fsqd
_refine_ls_matrix_type            full
_refine_ls_weighting_scheme       calc
_refine_ls_weighting_details
 'calc w=1/[\s^2^(Fo^2^)+(0.0865P)^2^+0.0000P] where P=(Fo^2^+2Fc^2^)/3'
_atom_sites_solution_primary      direct
_atom_sites_solution_secondary    difmap
_atom_sites_solution_hydrogens    geom
_refine_ls_hydrogen_treatment     mixed
_refine_ls_extinction_method      none
_refine_ls_extinction_coef        ?
_refine_ls_abs_structure_details
 'Flack H D (1983), Acta Cryst. A39, 876-881'
_refine_ls_abs_structure_Flack    0.006(16)
_refine_ls_number_reflns          18983
_refine_ls_number_parameters      919
_refine_ls_number_restraints      0
_refine_ls_R_factor_all           0.1192
_refine_ls_R_factor_gt            0.0597
_refine_ls_wR_factor_ref          0.1659
_refine_ls_wR_factor_gt           0.1473
_refine_ls_goodness_of_fit_ref    0.928
_refine_ls_restrained_S_all       0.928
_refine_ls_shift/su_max           0.002
_refine_ls_shift/su_mean          0.000
 
loop_
 _atom_site_label
 _atom_site_type_symbol
 _atom_site_fract_x
 _atom_site_fract_y
 _atom_site_fract_z
 _atom_site_U_iso_or_equiv
 _atom_site_adp_type
 _atom_site_occupancy
 _atom_site_symmetry_multiplicity
 _atom_site_calc_flag
 _atom_site_refinement_flags
 _atom_site_disorder_assembly
 _atom_site_disorder_group
Co Co 0.23774(3) 0.41634(3) 0.09861(2) 0.02202(13) Uani 1 1 d . . .
O21 O 0.2593(2) 0.4623(2) 0.31416(15) 0.0611(11) Uani 1 1 d . . .
O22 O 0.3561(2) 0.5012(2) 0.36880(17) 0.0629(11) Uani 1 1 d . . .
O31 O 0.5191(2) 0.49739(18) 0.05059(18) 0.0547(10) Uani 1 1 d . . .
O32 O 0.60142(19) 0.56401(19) 0.09866(18) 0.0602(11) Uani 1 1 d . . .
O41 O -0.01495(18) 0.48478(16) 0.10522(14) 0.0389(8) Uani 1 1 d . . .
O42 O -0.13564(18) 0.45696(17) 0.07624(15) 0.0455(9) Uani 1 1 d . . .
O51 O 0.2659(2) 0.25419(17) -0.03596(15) 0.0517(9) Uani 1 1 d . . .
O52 O 0.1951(2) 0.19393(19) -0.09723(17) 0.0577(10) Uani 1 1 d . . .
O61 O 0.1087(2) 0.30913(18) 0.23382(16) 0.0485(9) Uani 1 1 d . . .
O62 O 0.05198(18) 0.34726(16) 0.15444(14) 0.0375(8) Uani 1 1 d . . .
O63 O -0.0550(3) 0.3797(2) 0.2557(2) 0.0765(13) Uani 1 1 d . . .
O64 O -0.0093(3) 0.3551(3) 0.34210(19) 0.0995(18) Uani 1 1 d . . .
O71 O 0.4943(2) 0.3526(2) -0.02685(18) 0.0672(12) Uani 1 1 d . . .
O72 O 0.3873(2) 0.4076(2) -0.05510(15) 0.0556(10) Uani 1 1 d . . .
O73 O 0.4955(4) 0.2016(3) 0.1271(2) 0.113(2) Uani 1 1 d . . .
O74 O 0.5267(3) 0.2692(3) 0.1955(2) 0.0963(16) Uani 1 1 d . . .
N1 N 0.25034(19) 0.33410(15) 0.14133(14) 0.0240(8) Uani 1 1 d . . .
N2 N 0.32160(19) 0.45793(16) 0.14266(15) 0.0248(8) Uani 1 1 d . . .
N3 N 0.22619(18) 0.49814(16) 0.05494(14) 0.0219(8) Uani 1 1 d . . .
N4 N 0.15608(18) 0.37599(16) 0.05357(15) 0.0243(8) Uani 1 1 d . . .
N5 N 0.1565(2) 0.45292(17) 0.15076(16) 0.0297(9) Uani 1 1 d . . .
H5A H 0.1720 0.4959 0.1595 0.036 Uiso 1 1 calc R . .
H5B H 0.1116 0.4569 0.1295 0.036 Uiso 1 1 calc R . .
N6 N 0.30950(19) 0.38163(18) 0.03808(16) 0.0278(9) Uani 1 1 d . . .
H6A H 0.2925 0.3389 0.0299 0.033 Uiso 1 1 calc R . .
H6B H 0.2996 0.4071 0.0063 0.033 Uiso 1 1 calc R . .
C1 C 0.2294(2) 0.27052(19) 0.12244(18) 0.0243(9) Uani 1 1 d . . .
C2 C 0.2570(3) 0.2227(2) 0.1620(2) 0.0349(11) Uani 1 1 d . . .
H2 H 0.2512 0.1754 0.1587 0.042 Uiso 1 1 calc R . .
C3 C 0.2926(3) 0.2546(2) 0.2047(2) 0.0342(11) Uani 1 1 d . . .
H3 H 0.3145 0.2344 0.2376 0.041 Uiso 1 1 calc R . .
C4 C 0.2915(3) 0.3258(2) 0.19175(19) 0.0314(11) Uani 1 1 d . . .
C5 C 0.3336(3) 0.3745(2) 0.21952(19) 0.0313(11) Uani 1 1 d . . .
C6 C 0.3514(2) 0.4361(2) 0.1943(2) 0.0302(10) Uani 1 1 d . . .
C7 C 0.4115(3) 0.4813(3) 0.2124(2) 0.0396(12) Uani 1 1 d . . .
H7 H 0.4399 0.4788 0.2470 0.047 Uiso 1 1 calc R . .
C8 C 0.4203(3) 0.5276(3) 0.1721(2) 0.0427(13) Uani 1 1 d . . .
H8 H 0.4576 0.5630 0.1721 0.051 Uiso 1 1 calc R . .
C9 C 0.3628(2) 0.5144(2) 0.1283(2) 0.0306(11) Uani 1 1 d . . .
C10 C 0.3495(2) 0.5554(2) 0.08136(19) 0.0271(10) Uani 1 1 d . . .
C11 C 0.2810(2) 0.54925(19) 0.04902(18) 0.0229(9) Uani 1 1 d . . .
C12 C 0.2522(2) 0.5985(2) 0.01037(19) 0.0303(10) Uani 1 1 d . . .
H12 H 0.2793 0.6375 -0.0020 0.036 Uiso 1 1 calc R . .
C13 C 0.1792(2) 0.5796(2) -0.00545(19) 0.0297(10) Uani 1 1 d . . .
H13 H 0.1452 0.6032 -0.0303 0.036 Uiso 1 1 calc R . .
C14 C 0.1631(2) 0.5173(2) 0.02229(18) 0.0248(10) Uani 1 1 d . . .
C15 C 0.0973(2) 0.4786(2) 0.01302(18) 0.0246(9) Uani 1 1 d . . .
C16 C 0.0984(2) 0.4086(2) 0.02417(18) 0.0272(10) Uani 1 1 d . . .
C17 C 0.0479(2) 0.3604(2) -0.0011(2) 0.0322(11) Uani 1 1 d . . .
H17 H 0.0016 0.3697 -0.0220 0.039 Uiso 1 1 calc R . .
C18 C 0.0774(3) 0.2992(2) 0.0100(2) 0.0332(11) Uani 1 1 d . . .
H18 H 0.0577 0.2577 -0.0037 0.040 Uiso 1 1 calc R . .
C19 C 0.1439(2) 0.3080(2) 0.04619(18) 0.0243(9) Uani 1 1 d . . .
C20 C 0.1842(2) 0.2578(2) 0.07551(19) 0.0271(10) Uani 1 1 d . . .
C21 C 0.3779(3) 0.3556(2) 0.2719(2) 0.0399(12) Uani 1 1 d . . .
H21 H 0.4313 0.3382 0.2631 0.048 Uiso 1 1 calc R . .
C22 C 0.3448(4) 0.3257(3) 0.3260(2) 0.0504(15) Uani 1 1 d . . .
C23 C 0.2568(4) 0.3140(3) 0.3349(2) 0.0592(16) Uani 1 1 d . . .
H23A H 0.2457 0.2658 0.3333 0.089 Uiso 1 1 calc R . .
H23B H 0.2274 0.3370 0.3049 0.089 Uiso 1 1 calc R . .
H23C H 0.2411 0.3317 0.3720 0.089 Uiso 1 1 calc R . .
C24 C 0.3946(4) 0.2741(3) 0.3548(3) 0.071(2) Uani 1 1 d . . .
H24A H 0.4499 0.2841 0.3480 0.106 Uiso 1 1 calc R . .
H24B H 0.3823 0.2296 0.3395 0.106 Uiso 1 1 calc R . .
H24C H 0.3841 0.2747 0.3957 0.106 Uiso 1 1 calc R . .
C25 C 0.3764(3) 0.3977(3) 0.3273(2) 0.0416(13) Uani 1 1 d . . .
H25 H 0.4283 0.4030 0.3463 0.050 Uiso 1 1 calc R . .
C26 C 0.3224(4) 0.4554(3) 0.3343(2) 0.0503(15) Uani 1 1 d . . .
C27 C 0.3073(5) 0.5580(4) 0.3831(3) 0.104(3) Uani 1 1 d . . .
H27A H 0.3362 0.5883 0.4082 0.156 Uiso 1 1 calc R . .
H27B H 0.2600 0.5422 0.4025 0.156 Uiso 1 1 calc R . .
H27C H 0.2926 0.5818 0.3483 0.156 Uiso 1 1 calc R . .
C31 C 0.3997(3) 0.6150(2) 0.0700(2) 0.0370(12) Uani 1 1 d . . .
H31 H 0.3799 0.6563 0.0892 0.044 Uiso 1 1 calc R . .
C32 C 0.4381(3) 0.6299(3) 0.0147(2) 0.0451(14) Uani 1 1 d . . .
C33 C 0.4340(3) 0.5828(3) -0.0353(2) 0.0527(14) Uani 1 1 d . . .
H33A H 0.4638 0.6017 -0.0671 0.079 Uiso 1 1 calc R . .
H33B H 0.3793 0.5768 -0.0467 0.079 Uiso 1 1 calc R . .
H33C H 0.4564 0.5393 -0.0246 0.079 Uiso 1 1 calc R . .
C34 C 0.4388(3) 0.7033(3) -0.0046(3) 0.0654(18) Uani 1 1 d . . .
H34A H 0.4657 0.7069 -0.0412 0.098 Uiso 1 1 calc R . .
H34B H 0.4662 0.7306 0.0237 0.098 Uiso 1 1 calc R . .
H34C H 0.3849 0.7194 -0.0085 0.098 Uiso 1 1 calc R . .
C35 C 0.4890(3) 0.6139(3) 0.0654(2) 0.0433(13) Uani 1 1 d . . .
H35 H 0.5148 0.6542 0.0824 0.052 Uiso 1 1 calc R . .
C36 C 0.5363(3) 0.5515(3) 0.0703(2) 0.0429(13) Uani 1 1 d . . .
C37 C 0.6543(4) 0.5070(3) 0.1036(4) 0.087(2) Uani 1 1 d . . .
H37A H 0.7007 0.5202 0.1254 0.131 Uiso 1 1 calc R . .
H37B H 0.6702 0.4922 0.0657 0.131 Uiso 1 1 calc R . .
H37C H 0.6276 0.4701 0.1232 0.131 Uiso 1 1 calc R . .
C41 C 0.0280(2) 0.5066(2) -0.0177(2) 0.0280(10) Uani 1 1 d . . .
H41 H 0.0279 0.4960 -0.0592 0.034 Uiso 1 1 calc R . .
C42 C -0.0125(2) 0.5712(2) -0.0037(2) 0.0306(11) Uani 1 1 d . . .
C43 C 0.0104(3) 0.6153(2) 0.0451(2) 0.0427(13) Uani 1 1 d . . .
H43A H 0.0359 0.6558 0.0306 0.064 Uiso 1 1 calc R . .
H43B H 0.0467 0.5910 0.0700 0.064 Uiso 1 1 calc R . .
H43C H -0.0364 0.6278 0.0666 0.064 Uiso 1 1 calc R . .
C44 C -0.0452(3) 0.6091(3) -0.0536(2) 0.0465(14) Uani 1 1 d . . .
H44A H -0.0160 0.6509 -0.0587 0.070 Uiso 1 1 calc R . .
H44B H -0.1005 0.6194 -0.0467 0.070 Uiso 1 1 calc R . .
H44C H -0.0405 0.5816 -0.0879 0.070 Uiso 1 1 calc R . .
C45 C -0.0534(2) 0.5045(2) 0.0090(2) 0.0330(11) Uani 1 1 d . . .
H45 H -0.0969 0.4923 -0.0174 0.040 Uiso 1 1 calc R . .
C46 C -0.0635(3) 0.4818(2) 0.0684(2) 0.0325(11) Uani 1 1 d . . .
C47 C -0.1515(3) 0.4350(3) 0.1342(3) 0.0607(16) Uani 1 1 d . . .
H47A H -0.2050 0.4175 0.1366 0.091 Uiso 1 1 calc R . .
H47B H -0.1458 0.4731 0.1602 0.091 Uiso 1 1 calc R . .
H47C H -0.1144 0.3997 0.1448 0.091 Uiso 1 1 calc R . .
C51 C 0.1696(2) 0.1870(2) 0.05660(19) 0.0277(10) Uani 1 1 d . . .
H51 H 0.1210 0.1675 0.0736 0.033 Uiso 1 1 calc R . .
C52 C 0.2307(3) 0.1350(2) 0.0446(2) 0.0393(12) Uani 1 1 d . . .
C53 C 0.3186(3) 0.1501(3) 0.0472(2) 0.0488(14) Uani 1 1 d . . .
H53A H 0.3276 0.1971 0.0368 0.073 Uiso 1 1 calc R . .
H53B H 0.3464 0.1209 0.0206 0.073 Uiso 1 1 calc R . .
H53C H 0.3378 0.1422 0.0858 0.073 Uiso 1 1 calc R . .
C54 C 0.2096(3) 0.0626(2) 0.0594(3) 0.0575(16) Uani 1 1 d . . .
H54A H 0.2430 0.0471 0.0906 0.086 Uiso 1 1 calc R . .
H54B H 0.2178 0.0340 0.0261 0.086 Uiso 1 1 calc R . .
H54C H 0.1547 0.0603 0.0710 0.086 Uiso 1 1 calc R . .
C55 C 0.1825(3) 0.1647(2) -0.0035(2) 0.0374(12) Uani 1 1 d . . .
H55 H 0.1411 0.1345 -0.0192 0.045 Uiso 1 1 calc R . .
C56 C 0.2196(3) 0.2097(2) -0.0453(2) 0.0423(13) Uani 1 1 d . . .
C57 C 0.2286(5) 0.2339(4) -0.1434(3) 0.081(2) Uani 1 1 d . . .
H57A H 0.2071 0.2187 -0.1798 0.122 Uiso 1 1 calc R . .
H57B H 0.2856 0.2286 -0.1437 0.122 Uiso 1 1 calc R . .
H57C H 0.2154 0.2813 -0.1377 0.122 Uiso 1 1 calc R . .
C61 C 0.1330(3) 0.4220(2) 0.2045(2) 0.0330(11) Uani 1 1 d . . .
H61 H 0.1810 0.4177 0.2285 0.040 Uiso 1 1 calc R . .
C62 C 0.0979(3) 0.3523(2) 0.1983(2) 0.0344(11) Uani 1 1 d . . .
C63 C 0.0072(3) 0.2859(3) 0.1500(3) 0.0513(15) Uani 1 1 d . . .
H63A H -0.0257 0.2876 0.1159 0.077 Uiso 1 1 calc R . .
H63B H -0.0260 0.2809 0.1836 0.077 Uiso 1 1 calc R . .
H63C H 0.0430 0.2476 0.1473 0.077 Uiso 1 1 calc R . .
C64 C 0.0745(3) 0.4686(3) 0.2369(2) 0.0462(14) Uani 1 1 d . . .
H64A H 0.0987 0.5134 0.2414 0.055 Uiso 1 1 calc R . .
H64B H 0.0268 0.4741 0.2134 0.055 Uiso 1 1 calc R . .
C65 C 0.0507(4) 0.4432(3) 0.2947(3) 0.0663(18) Uani 1 1 d . . .
H65A H 0.0978 0.4256 0.3141 0.080 Uiso 1 1 calc R . .
H65B H 0.0310 0.4814 0.3173 0.080 Uiso 1 1 calc R . .
C66 C -0.0098(4) 0.3899(3) 0.2942(3) 0.0629(18) Uani 1 1 d . . .
C67 C -0.0648(6) 0.3020(5) 0.3451(4) 0.125(4) Uani 1 1 d . . .
H67A H -0.0599 0.2790 0.3817 0.188 Uiso 1 1 calc R . .
H67B H -0.0550 0.2700 0.3143 0.188 Uiso 1 1 calc R . .
H67C H -0.1178 0.3203 0.3413 0.188 Uiso 1 1 calc R . .
C71 C 0.3955(3) 0.3774(2) 0.0429(2) 0.0366(12) Uani 1 1 d . . .
H71 H 0.4153 0.4177 0.0636 0.044 Uiso 1 1 calc R . .
C72 C 0.4318(3) 0.3760(3) -0.0179(2) 0.0452(14) Uani 1 1 d . . .
C73 C 0.4203(5) 0.4089(4) -0.1142(3) 0.099(3) Uani 1 1 d . . .
H73A H 0.3838 0.4321 -0.1396 0.149 Uiso 1 1 calc R . .
H73B H 0.4281 0.3628 -0.1276 0.149 Uiso 1 1 calc R . .
H73C H 0.4706 0.4326 -0.1140 0.149 Uiso 1 1 calc R . .
C74 C 0.4201(3) 0.3138(3) 0.0751(2) 0.0435(13) Uani 1 1 d . . .
H74A H 0.3757 0.2988 0.0989 0.052 Uiso 1 1 calc R . .
H74B H 0.4311 0.2780 0.0471 0.052 Uiso 1 1 calc R . .
C75 C 0.4901(3) 0.3221(3) 0.1122(3) 0.0596(16) Uani 1 1 d . . .
H75A H 0.4821 0.3606 0.1381 0.071 Uiso 1 1 calc R . .
H75B H 0.5366 0.3315 0.0885 0.071 Uiso 1 1 calc R . .
C76 C 0.5043(4) 0.2570(4) 0.1478(3) 0.0671(19) Uani 1 1 d . . .
C77 C 0.5496(6) 0.2064(5) 0.2325(4) 0.134(4) Uani 1 1 d . . .
H77A H 0.5654 0.2212 0.2705 0.200 Uiso 1 1 calc R . .
H77B H 0.5931 0.1826 0.2144 0.200 Uiso 1 1 calc R . .
H77C H 0.5045 0.1762 0.2356 0.200 Uiso 1 1 calc R . .
Cl1 Cl 0.33943(13) 0.77258(8) 0.13666(7) 0.0828(6) Uani 1 1 d . . .
C101 C 0.3333(4) 0.9226(4) 0.2023(3) 0.082(2) Uani 1 1 d . . .
H101 H 0.3385 0.8885 0.1713 0.099 Uiso 1 1 calc R . .
Cl11 Cl 0.23502(14) 0.92629(18) 0.22193(12) 0.1461(11) Uani 1 1 d . . .
Cl12 Cl 0.3648(2) 1.00070(14) 0.17505(13) 0.1560(12) Uani 1 1 d . . .
Cl13 Cl 0.39242(15) 0.89872(14) 0.25669(12) 0.1289(9) Uani 1 1 d . . .
C102 C 0.1221(5) 0.1474(4) 0.2624(3) 0.093(3) Uani 1 1 d . . .
H102 H 0.1295 0.1953 0.2508 0.112 Uiso 1 1 calc R . .
Cl21 Cl 0.0494(4) 0.1438(2) 0.3080(2) 0.313(4) Uani 1 1 d . . .
Cl22 Cl 0.2123(2) 0.11735(13) 0.29183(15) 0.1717(15) Uani 1 1 d . . .
Cl23 Cl 0.10337(18) 0.10150(15) 0.20306(12) 0.1384(10) Uani 1 1 d . . .
C103 C 0.2319(4) 0.8262(3) 0.0218(3) 0.0697(18) Uani 1 1 d . . .
H103 H 0.2719 0.8115 0.0502 0.084 Uiso 1 1 calc R . .
Cl31 Cl 0.1833(3) 0.89525(10) 0.04781(13) 0.1770(16) Uani 1 1 d . . .
Cl32 Cl 0.27852(12) 0.84303(17) -0.04268(10) 0.1413(12) Uani 1 1 d . . .
Cl33 Cl 0.16467(12) 0.76239(9) 0.01216(9) 0.0907(6) Uani 1 1 d . . .
C104 C 0.2149(4) 0.6660(3) 0.2016(3) 0.0676(18) Uani 1 1 d . . .
H104 H 0.2544 0.6999 0.1891 0.081 Uiso 1 1 calc R . .
Cl41 Cl 0.1564(2) 0.7002(2) 0.25453(12) 0.205(2) Uani 1 1 d . . .
Cl42 Cl 0.26207(14) 0.59797(11) 0.23056(9) 0.1074(7) Uani 1 1 d . . .
Cl43 Cl 0.15836(10) 0.64157(8) 0.14386(7) 0.0701(5) Uani 1 1 d . . .
 
loop_
 _atom_site_aniso_label
 _atom_site_aniso_U_11
 _atom_site_aniso_U_22
 _atom_site_aniso_U_33
 _atom_site_aniso_U_23
 _atom_site_aniso_U_13
 _atom_site_aniso_U_12
Co 0.0213(2) 0.0182(2) 0.0266(3) -0.0001(2) 0.0006(2) -0.0001(2)
O21 0.065(3) 0.071(3) 0.047(2) -0.0064(19) -0.012(2) 0.015(2)
O22 0.087(3) 0.057(2) 0.045(2) -0.006(2) -0.016(2) 0.013(2)
O31 0.040(2) 0.037(2) 0.088(3) 0.000(2) -0.003(2) -0.0037(17)
O32 0.0347(18) 0.063(2) 0.083(3) -0.008(2) -0.016(2) 0.0017(18)
O41 0.0325(17) 0.047(2) 0.037(2) 0.0073(16) -0.0035(16) 0.0057(15)
O42 0.0309(17) 0.046(2) 0.059(2) 0.0045(18) 0.0068(16) -0.0064(16)
O51 0.057(2) 0.0375(19) 0.061(2) -0.0120(17) 0.017(2) -0.0160(19)
O52 0.070(2) 0.056(2) 0.047(2) -0.003(2) 0.002(2) -0.005(2)
O61 0.048(2) 0.042(2) 0.056(2) 0.0124(19) 0.0121(19) -0.0005(18)
O62 0.0376(18) 0.0333(18) 0.042(2) -0.0030(15) 0.0027(17) -0.0042(16)
O63 0.063(3) 0.097(4) 0.070(3) -0.012(3) 0.023(3) -0.005(3)
O64 0.149(5) 0.102(4) 0.047(3) 0.000(3) 0.014(3) -0.059(4)
O71 0.054(2) 0.067(3) 0.080(3) 0.015(2) 0.032(2) 0.025(2)
O72 0.056(2) 0.067(3) 0.044(2) 0.022(2) 0.0177(19) 0.020(2)
O73 0.175(6) 0.086(4) 0.077(4) -0.006(3) -0.037(4) 0.051(4)
O74 0.128(4) 0.102(4) 0.059(3) -0.010(3) -0.014(3) 0.017(4)
N1 0.024(2) 0.0206(16) 0.027(2) 0.0004(14) -0.0016(16) -0.0014(15)
N2 0.0235(18) 0.0212(18) 0.030(2) 0.0046(16) -0.0020(16) -0.0024(15)
N3 0.0212(17) 0.0195(16) 0.025(2) -0.0007(14) 0.0016(15) 0.0011(15)
N4 0.0189(17) 0.0175(17) 0.036(2) -0.0003(15) -0.0030(16) 0.0009(15)
N5 0.035(2) 0.0220(19) 0.032(2) -0.0094(16) 0.0046(18) -0.0028(17)
N6 0.0245(18) 0.0256(19) 0.033(2) 0.0028(16) 0.0057(16) 0.0032(16)
C1 0.024(2) 0.0199(19) 0.030(2) -0.0012(17) 0.001(2) 0.0011(19)
C2 0.036(3) 0.023(2) 0.046(3) 0.002(2) 0.001(2) -0.004(2)
C3 0.045(3) 0.032(2) 0.026(3) 0.013(2) 0.001(2) 0.001(2)
C4 0.034(2) 0.029(2) 0.032(3) 0.006(2) 0.000(2) 0.001(2)
C5 0.035(2) 0.033(3) 0.026(3) 0.001(2) -0.004(2) -0.001(2)
C6 0.027(2) 0.027(2) 0.036(3) -0.001(2) -0.002(2) -0.0033(19)
C7 0.045(3) 0.043(3) 0.031(3) 0.003(2) -0.019(2) -0.010(2)
C8 0.040(3) 0.036(3) 0.052(3) 0.003(2) -0.014(3) -0.012(2)
C9 0.028(2) 0.032(2) 0.032(3) 0.001(2) -0.005(2) -0.007(2)
C10 0.026(2) 0.024(2) 0.032(3) -0.0009(19) 0.002(2) 0.0000(19)
C11 0.022(2) 0.018(2) 0.028(2) 0.0009(18) 0.0042(18) -0.0011(17)
C12 0.029(2) 0.022(2) 0.040(3) 0.0028(18) 0.002(2) 0.0000(18)
C13 0.030(2) 0.023(2) 0.036(3) 0.004(2) 0.002(2) 0.002(2)
C14 0.024(2) 0.022(2) 0.029(3) -0.0027(18) 0.003(2) 0.0036(18)
C15 0.028(2) 0.028(2) 0.018(2) -0.0003(18) 0.0016(18) 0.0085(19)
C16 0.024(2) 0.029(2) 0.029(3) -0.003(2) 0.0027(18) 0.000(2)
C17 0.020(2) 0.028(2) 0.048(3) -0.009(2) -0.008(2) -0.0014(19)
C18 0.038(3) 0.023(2) 0.038(3) -0.008(2) -0.005(2) -0.005(2)
C19 0.019(2) 0.023(2) 0.031(3) -0.0090(19) 0.0008(19) 0.0016(18)
C20 0.024(2) 0.018(2) 0.039(3) 0.0050(19) 0.006(2) 0.0020(18)
C21 0.048(3) 0.032(3) 0.039(3) 0.007(2) -0.012(2) 0.002(2)
C22 0.081(4) 0.038(3) 0.032(3) 0.008(2) -0.011(3) 0.001(3)
C23 0.075(4) 0.067(4) 0.036(3) 0.010(3) -0.002(3) -0.018(3)
C24 0.115(5) 0.051(4) 0.047(4) 0.011(3) -0.034(4) 0.002(4)
C25 0.055(3) 0.044(3) 0.026(3) 0.005(2) -0.015(2) 0.001(3)
C26 0.071(4) 0.058(4) 0.022(3) -0.001(3) -0.012(3) -0.002(3)
C27 0.163(8) 0.073(5) 0.075(5) -0.028(4) -0.036(5) 0.055(5)
C31 0.027(2) 0.029(2) 0.055(3) -0.004(2) 0.000(2) -0.002(2)
C32 0.029(2) 0.039(3) 0.067(4) 0.017(3) 0.005(3) -0.013(2)
C33 0.049(3) 0.054(3) 0.055(4) 0.016(3) 0.012(3) -0.002(3)
C34 0.056(3) 0.035(3) 0.105(5) 0.023(3) 0.010(4) -0.010(3)
C35 0.028(2) 0.036(3) 0.066(4) 0.000(3) 0.004(2) -0.015(2)
C36 0.029(3) 0.041(3) 0.059(4) 0.005(3) 0.002(2) -0.010(2)
C37 0.057(4) 0.076(5) 0.129(7) 0.005(5) -0.026(4) 0.012(4)
C41 0.030(2) 0.027(2) 0.028(3) -0.0017(19) -0.006(2) 0.0050(19)
C42 0.027(2) 0.026(2) 0.039(3) 0.005(2) -0.001(2) 0.0067(19)
C43 0.033(3) 0.026(2) 0.069(4) 0.001(3) 0.008(3) -0.001(2)
C44 0.043(3) 0.043(3) 0.053(4) 0.012(3) 0.004(3) 0.017(2)
C45 0.026(2) 0.029(2) 0.044(3) 0.000(2) -0.012(2) 0.002(2)
C46 0.029(3) 0.024(2) 0.045(3) -0.003(2) 0.007(2) 0.005(2)
C47 0.057(3) 0.058(4) 0.068(4) 0.017(3) 0.023(3) -0.004(3)
C51 0.023(2) 0.022(2) 0.038(3) 0.000(2) -0.005(2) 0.0010(18)
C52 0.037(2) 0.024(2) 0.056(3) -0.006(2) -0.012(3) 0.006(2)
C53 0.038(3) 0.044(3) 0.065(4) -0.022(3) -0.003(3) 0.008(2)
C54 0.064(4) 0.023(2) 0.085(5) -0.006(3) -0.016(3) 0.007(2)
C55 0.039(3) 0.024(2) 0.049(3) -0.009(2) -0.008(2) 0.003(2)
C56 0.038(3) 0.033(3) 0.056(4) -0.013(2) 0.000(3) 0.008(2)
C57 0.093(5) 0.084(5) 0.067(4) 0.018(4) -0.003(4) -0.008(4)
C61 0.033(2) 0.032(2) 0.034(3) -0.003(2) 0.007(2) 0.000(2)
C62 0.034(3) 0.036(3) 0.034(3) -0.001(2) 0.018(2) 0.004(2)
C63 0.050(3) 0.042(3) 0.062(4) -0.006(3) 0.015(3) -0.018(3)
C64 0.052(3) 0.040(3) 0.046(4) -0.006(3) 0.014(3) 0.005(3)
C65 0.072(4) 0.076(4) 0.050(4) -0.023(3) 0.023(3) -0.005(4)
C66 0.068(4) 0.068(4) 0.053(4) -0.018(4) 0.028(4) -0.005(4)
C67 0.174(10) 0.112(7) 0.090(6) 0.005(6) 0.024(6) -0.060(7)
C71 0.025(2) 0.035(3) 0.050(3) -0.008(2) 0.001(2) 0.001(2)
C72 0.053(3) 0.032(3) 0.050(4) 0.006(2) 0.021(3) 0.002(3)
C73 0.113(6) 0.117(7) 0.068(5) 0.028(5) 0.032(4) 0.045(5)
C74 0.032(3) 0.049(3) 0.050(3) 0.005(3) 0.002(2) 0.005(2)
C75 0.044(3) 0.063(4) 0.072(4) -0.004(3) -0.001(3) 0.010(3)
C76 0.067(4) 0.069(5) 0.065(5) -0.010(4) -0.026(4) 0.030(4)
C77 0.143(8) 0.119(8) 0.138(9) 0.038(7) -0.008(7) 0.062(7)
Cl1 0.1393(17) 0.0511(9) 0.0580(10) 0.0014(8) -0.0064(11) -0.0237(11)
C101 0.077(4) 0.089(5) 0.080(5) -0.007(4) 0.004(4) 0.018(4)
Cl11 0.0865(14) 0.212(3) 0.140(2) -0.050(2) 0.0222(15) 0.0346(18)
Cl12 0.234(3) 0.0890(17) 0.145(2) 0.0139(16) 0.047(2) 0.012(2)
Cl13 0.1152(18) 0.142(2) 0.130(2) 0.0095(18) -0.0476(16) 0.0048(16)
C102 0.141(7) 0.065(4) 0.073(5) 0.030(4) 0.044(5) 0.014(5)
Cl21 0.415(7) 0.183(4) 0.341(6) 0.054(4) 0.312(6) 0.040(5)
Cl22 0.218(3) 0.0948(17) 0.202(3) 0.0700(19) -0.101(3) -0.027(2)
Cl23 0.154(2) 0.143(2) 0.119(2) 0.0106(18) -0.0203(18) -0.071(2)
C103 0.062(4) 0.073(4) 0.074(4) 0.014(3) -0.019(4) -0.021(3)
Cl31 0.348(5) 0.0355(10) 0.148(2) -0.0191(12) 0.024(3) 0.0061(19)
Cl32 0.0685(12) 0.251(3) 0.1048(17) 0.087(2) -0.0054(12) -0.0171(17)
Cl33 0.1067(14) 0.0601(10) 0.1054(15) -0.0153(10) -0.0029(12) -0.0283(10)
C104 0.073(4) 0.056(4) 0.074(5) -0.012(3) -0.015(4) -0.004(3)
Cl41 0.217(3) 0.293(4) 0.106(2) -0.117(3) -0.061(2) 0.165(3)
Cl42 0.1315(17) 0.0997(15) 0.0910(14) -0.0136(11) -0.0421(14) 0.0441(14)
Cl43 0.0884(11) 0.0673(10) 0.0545(10) -0.0135(8) -0.0166(9) 0.0101(10)
 
_geom_special_details
;
 All esds (except the esd in the dihedral angle between two l.s. planes)
 are estimated using the full covariance matrix.  The cell esds are taken
 into account individually in the estimation of esds in distances, angles
 and torsion angles; correlations between esds in cell parameters are only
 used when they are defined by crystal symmetry.  An approximate (isotropic)
 treatment of cell esds is used for estimating esds involving l.s. planes.
;
 
loop_
 _geom_bond_atom_site_label_1
 _geom_bond_atom_site_label_2
 _geom_bond_distance
 _geom_bond_site_symmetry_2
 _geom_bond_publ_flag
Co N4 1.929(3) . ?
Co N1 1.935(3) . ?
Co N3 1.938(3) . ?
Co N2 1.954(3) . ?
Co N5 1.992(4) . ?
Co N6 2.004(3) . ?
O21 C26 1.185(6) . ?
O22 C26 1.351(6) . ?
O22 C27 1.445(7) . ?
O31 C36 1.210(6) . ?
O32 C36 1.322(6) . ?
O32 C37 1.457(7) . ?
O41 C46 1.201(5) . ?
O42 C46 1.341(5) . ?
O42 C47 1.460(6) . ?
O51 C56 1.209(6) . ?
O52 C56 1.330(6) . ?
O52 C57 1.465(7) . ?
O61 C62 1.214(6) . ?
O62 C62 1.301(6) . ?
O62 C63 1.447(6) . ?
O63 C66 1.207(8) . ?
O64 C66 1.325(8) . ?
O64 C67 1.425(9) . ?
O71 C72 1.185(6) . ?
O72 C72 1.321(6) . ?
O72 C73 1.502(7) . ?
O73 C76 1.218(8) . ?
O74 C76 1.210(7) . ?
O74 C77 1.576(9) . ?
N1 C1 1.390(5) . ?
N1 C4 1.390(5) . ?
N2 C9 1.370(5) . ?
N2 C6 1.388(6) . ?
N3 C14 1.378(5) . ?
N3 C11 1.391(5) . ?
N4 C16 1.369(5) . ?
N4 C19 1.383(5) . ?
N5 C61 1.463(6) . ?
N6 C71 1.476(5) . ?
C1 C20 1.372(6) . ?
C1 C2 1.414(6) . ?
C2 C3 1.337(6) . ?
C3 C4 1.451(6) . ?
C4 C5 1.373(6) . ?
C5 C6 1.398(6) . ?
C5 C21 1.495(6) . ?
C6 C7 1.433(6) . ?
C7 C8 1.332(7) . ?
C8 C9 1.449(6) . ?
C9 C10 1.394(6) . ?
C10 C11 1.403(6) . ?
C10 C31 1.489(6) . ?
C11 C12 1.427(6) . ?
C12 C13 1.356(6) . ?
C13 C14 1.430(6) . ?
C14 C15 1.381(6) . ?
C15 C16 1.420(6) . ?
C15 C41 1.496(6) . ?
C16 C17 1.422(6) . ?
C17 C18 1.346(6) . ?
C18 C19 1.431(6) . ?
C19 C20 1.397(6) . ?
C20 C51 1.500(6) . ?
C21 C22 1.516(7) . ?
C21 C25 1.550(7) . ?
C22 C24 1.498(7) . ?
C22 C25 1.534(7) . ?
C22 C23 1.537(8) . ?
C25 C26 1.484(8) . ?
C31 C32 1.488(7) . ?
C31 C35 1.531(6) . ?
C32 C33 1.507(8) . ?
C32 C35 1.512(7) . ?
C32 C34 1.532(7) . ?
C35 C36 1.488(7) . ?
C41 C42 1.498(6) . ?
C41 C45 1.526(6) . ?
C42 C43 1.498(7) . ?
C42 C44 1.506(6) . ?
C42 C45 1.531(6) . ?
C45 C46 1.480(7) . ?
C51 C52 1.499(6) . ?
C51 C55 1.500(7) . ?
C52 C55 1.521(7) . ?
C52 C54 1.527(7) . ?
C52 C53 1.534(7) . ?
C55 C56 1.474(7) . ?
C61 C62 1.521(7) . ?
C61 C64 1.564(6) . ?
C64 C65 1.507(8) . ?
C65 C66 1.482(9) . ?
C71 C74 1.536(7) . ?
C71 C72 1.559(7) . ?
C74 C75 1.490(7) . ?
C75 C76 1.563(9) . ?
C101 Cl13 1.700(7) . ?
C101 Cl11 1.744(7) . ?
C101 Cl12 1.768(8) . ?
C102 Cl21 1.644(8) . ?
C102 Cl23 1.700(9) . ?
C102 Cl22 1.795(9) . ?
C103 Cl31 1.721(7) . ?
C103 Cl33 1.729(6) . ?
C103 Cl32 1.747(7) . ?
C104 Cl42 1.719(7) . ?
C104 Cl41 1.737(7) . ?
C104 Cl43 1.738(6) . ?
 
loop_
 _geom_angle_atom_site_label_1
 _geom_angle_atom_site_label_2
 _geom_angle_atom_site_label_3
 _geom_angle
 _geom_angle_site_symmetry_1
 _geom_angle_site_symmetry_3
 _geom_angle_publ_flag
N4 Co N1 90.75(14) . . ?
N4 Co N3 89.16(14) . . ?
N1 Co N3 179.12(15) . . ?
N4 Co N2 178.70(16) . . ?
N1 Co N2 90.11(14) . . ?
N3 Co N2 89.96(14) . . ?
N4 Co N5 89.27(15) . . ?
N1 Co N5 93.86(14) . . ?
N3 Co N5 87.02(14) . . ?
N2 Co N5 91.65(14) . . ?
N4 Co N6 84.71(14) . . ?
N1 Co N6 90.52(14) . . ?
N3 Co N6 88.60(14) . . ?
N2 Co N6 94.31(15) . . ?
N5 Co N6 172.60(16) . . ?
C26 O22 C27 115.0(5) . . ?
C36 O32 C37 114.6(4) . . ?
C46 O42 C47 114.2(4) . . ?
C56 O52 C57 115.6(5) . . ?
C62 O62 C63 116.2(4) . . ?
C66 O64 C67 115.3(6) . . ?
C72 O72 C73 114.0(4) . . ?
C76 O74 C77 115.6(7) . . ?
C1 N1 C4 107.2(3) . . ?
C1 N1 Co 125.3(3) . . ?
C4 N1 Co 126.9(3) . . ?
C9 N2 C6 106.6(3) . . ?
C9 N2 Co 126.5(3) . . ?
C6 N2 Co 126.9(3) . . ?
C14 N3 C11 105.6(3) . . ?
C14 N3 Co 127.5(3) . . ?
C11 N3 Co 126.9(3) . . ?
C16 N4 C19 107.1(3) . . ?
C16 N4 Co 127.0(3) . . ?
C19 N4 Co 126.0(3) . . ?
C61 N5 Co 124.8(3) . . ?
C71 N6 Co 125.1(3) . . ?
C20 C1 N1 124.8(4) . . ?
C20 C1 C2 126.4(4) . . ?
N1 C1 C2 108.6(4) . . ?
C3 C2 C1 109.0(4) . . ?
C2 C3 C4 107.6(4) . . ?
C5 C4 N1 126.0(4) . . ?
C5 C4 C3 125.7(4) . . ?
N1 C4 C3 107.6(4) . . ?
C4 C5 C6 122.1(4) . . ?
C4 C5 C21 118.7(4) . . ?
C6 C5 C21 117.5(4) . . ?
N2 C6 C5 124.7(4) . . ?
N2 C6 C7 109.1(4) . . ?
C5 C6 C7 125.6(4) . . ?
C8 C7 C6 107.8(4) . . ?
C7 C8 C9 107.7(4) . . ?
N2 C9 C10 126.4(4) . . ?
N2 C9 C8 108.9(4) . . ?
C10 C9 C8 124.6(4) . . ?
C9 C10 C11 121.0(4) . . ?
C9 C10 C31 121.1(4) . . ?
C11 C10 C31 116.9(4) . . ?
N3 C11 C10 124.9(4) . . ?
N3 C11 C12 109.6(3) . . ?
C10 C11 C12 125.0(4) . . ?
C13 C12 C11 107.5(4) . . ?
C12 C13 C14 107.1(4) . . ?
N3 C14 C15 124.8(4) . . ?
N3 C14 C13 110.1(4) . . ?
C15 C14 C13 124.7(4) . . ?
C14 C15 C16 120.6(4) . . ?
C14 C15 C41 120.9(4) . . ?
C16 C15 C41 117.8(4) . . ?
N4 C16 C15 124.7(4) . . ?
N4 C16 C17 109.1(4) . . ?
C15 C16 C17 125.4(4) . . ?
C18 C17 C16 107.7(4) . . ?
C17 C18 C19 107.6(4) . . ?
N4 C19 C20 124.4(4) . . ?
N4 C19 C18 108.4(4) . . ?
C20 C19 C18 126.7(4) . . ?
C1 C20 C19 122.9(4) . . ?
C1 C20 C51 120.4(4) . . ?
C19 C20 C51 116.4(4) . . ?
C5 C21 C22 127.1(5) . . ?
C5 C21 C25 123.4(4) . . ?
C22 C21 C25 60.0(3) . . ?
C24 C22 C21 116.1(5) . . ?
C24 C22 C25 115.8(5) . . ?
C21 C22 C25 61.1(3) . . ?
C24 C22 C23 113.0(5) . . ?
C21 C22 C23 122.6(5) . . ?
C25 C22 C23 118.9(5) . . ?
C26 C25 C22 120.5(5) . . ?
C26 C25 C21 121.6(4) . . ?
C22 C25 C21 58.9(3) . . ?
O21 C26 O22 123.4(6) . . ?
O21 C26 C25 127.6(5) . . ?
O22 C26 C25 109.0(5) . . ?
C32 C31 C10 124.9(4) . . ?
C32 C31 C35 60.1(3) . . ?
C10 C31 C35 125.1(4) . . ?
C31 C32 C33 122.5(4) . . ?
C31 C32 C35 61.3(3) . . ?
C33 C32 C35 120.7(5) . . ?
C31 C32 C34 117.0(5) . . ?
C33 C32 C34 111.4(5) . . ?
C35 C32 C34 115.5(5) . . ?
C36 C35 C32 123.4(5) . . ?
C36 C35 C31 123.2(4) . . ?
C32 C35 C31 58.6(3) . . ?
O31 C36 O32 124.5(5) . . ?
O31 C36 C35 125.7(5) . . ?
O32 C36 C35 109.8(4) . . ?
C15 C41 C42 125.4(4) . . ?
C15 C41 C45 120.8(4) . . ?
C42 C41 C45 60.8(3) . . ?
C43 C42 C41 123.6(4) . . ?
C43 C42 C44 113.6(4) . . ?
C41 C42 C44 115.5(4) . . ?
C43 C42 C45 118.6(4) . . ?
C41 C42 C45 60.5(3) . . ?
C44 C42 C45 114.7(4) . . ?
C46 C45 C41 120.3(4) . . ?
C46 C45 C42 120.2(4) . . ?
C41 C45 C42 58.7(3) . . ?
O41 C46 O42 123.7(5) . . ?
O41 C46 C45 125.8(4) . . ?
O42 C46 C45 110.5(4) . . ?
C52 C51 C55 61.0(3) . . ?
C52 C51 C20 126.3(4) . . ?
C55 C51 C20 122.3(4) . . ?
C51 C52 C55 59.6(3) . . ?
C51 C52 C54 116.5(4) . . ?
C55 C52 C54 114.3(4) . . ?
C51 C52 C53 122.6(4) . . ?
C55 C52 C53 118.9(5) . . ?
C54 C52 C53 114.1(4) . . ?
C56 C55 C51 120.8(4) . . ?
C56 C55 C52 120.0(4) . . ?
C51 C55 C52 59.5(3) . . ?
O51 C56 O52 123.1(5) . . ?
O51 C56 C55 127.3(5) . . ?
O52 C56 C55 109.5(4) . . ?
N5 C61 C62 114.2(4) . . ?
N5 C61 C64 110.4(4) . . ?
C62 C61 C64 109.7(4) . . ?
O61 C62 O62 125.7(5) . . ?
O61 C62 C61 121.5(5) . . ?
O62 C62 C61 112.6(4) . . ?
C65 C64 C61 114.4(5) . . ?
C66 C65 C64 114.9(5) . . ?
O63 C66 O64 123.7(6) . . ?
O63 C66 C65 125.0(7) . . ?
O64 C66 C65 111.3(7) . . ?
N6 C71 C74 111.0(4) . . ?
N6 C71 C72 109.1(4) . . ?
C74 C71 C72 109.3(4) . . ?
O71 C72 O72 126.0(5) . . ?
O71 C72 C71 122.0(5) . . ?
O72 C72 C71 111.8(4) . . ?
C75 C74 C71 114.8(5) . . ?
C74 C75 C76 110.4(5) . . ?
O74 C76 O73 126.4(7) . . ?
O74 C76 C75 112.4(7) . . ?
O73 C76 C75 121.2(6) . . ?
Cl13 C101 Cl11 112.6(4) . . ?
Cl13 C101 Cl12 109.8(4) . . ?
Cl11 C101 Cl12 110.6(4) . . ?
Cl21 C102 Cl23 111.8(6) . . ?
Cl21 C102 Cl22 112.5(5) . . ?
Cl23 C102 Cl22 107.4(4) . . ?
Cl31 C103 Cl33 108.3(4) . . ?
Cl31 C103 Cl32 112.1(4) . . ?
Cl33 C103 Cl32 109.3(4) . . ?
Cl42 C104 Cl41 107.2(4) . . ?
Cl42 C104 Cl43 110.5(3) . . ?
Cl41 C104 Cl43 110.6(4) . . ?
 
loop_
 _geom_hbond_atom_site_label_D
 _geom_hbond_atom_site_label_H
 _geom_hbond_atom_site_label_A
 _geom_hbond_distance_DH
 _geom_hbond_distance_HA
 _geom_hbond_distance_DA
 _geom_hbond_angle_DHA
 _geom_hbond_site_symmetry_A
C71 H71 O31  1.00 2.40 3.197(6) 136.0 .
N5 H5B O41  0.92 2.31 3.185(5) 159.8 .
N6 H6A O51  0.92 2.34 3.170(5) 150.4 .
C102 H102 O61  1.00 2.33 3.300(8) 162.9 .
C33 H33A O64  0.98 2.43 3.394(7) 166.6 2_564
C18 H18 O71  0.95 2.56 3.367(6) 143.5 4_455
C51 H51 O71  1.00 2.46 3.177(6) 127.9 4_455
N6 H6B O72  0.92 2.08 2.617(5) 115.8 .
C101 H101 Cl1  1.00 2.45 3.367(8) 152.1 .
C103 H103 Cl1  1.00 2.47 3.440(7) 164.7 .
C104 H104 Cl1  1.00 2.39 3.374(7) 166.1 .
C31 H31 Cl1  1.00 2.66 3.661(5) 174.4 .
C67 H67B Cl41  0.98 2.75 3.474(10) 131.1 3_545
C27 H27C Cl42  0.98 2.84 3.760(7) 156.7 .
C43 H43B Cl43  0.98 2.77 3.476(5) 129.2 .
C61 H61 O21  1.00 2.58 3.460(6) 147.0 .
 
_diffrn_measured_fraction_theta_max    0.870
_diffrn_reflns_theta_full              29.65
_diffrn_measured_fraction_theta_full   0.870
_refine_diff_density_max    0.781
_refine_diff_density_min   -0.571
_refine_diff_density_rms    0.103
#==END
